# Supplementary material for: Synthesis, Characterization, and Anticancer Activities Evaluation of Compounds Derived from 3,4-Dihydropyrimidin-2(1H)-one
Source: MDPI journal article supplement (doi:10.3390/molecules24050891), 2019-03-03
Supplement: s1 [file s1]

# Supplementary Materials

## Synthesis, Characterization, and Anticancer Activities Evaluation of Compounds Derived from 3,4-Dihydropyrimidin-2(1H)-one

Ye Liu <sup>1</sup>, Jiaqi Liu <sup>1</sup>, Renmei Zhang <sup>1</sup>, Yan Guo <sup>1</sup>, Hongbo Wang <sup>1</sup>, Qingguo Meng <sup>1</sup>, Yuan Sun <sup>2</sup>  
and Zongliang Liu <sup>1,\*</sup>

<sup>1</sup> School of Pharmacy, Key Laboratory of Molecular Pharmacology and Drug Evaluation (Yantai University), Ministry of Education, Collaborative Innovation Center of Advanced Drug Delivery System and Biotech Drugs in Universities of Shandong, Yantai University, Yantai 264005, China; liuyeer126@126.com (Y.L.); jiaqi.miami@gmail.com (J.L.); zhangrenmeigrace@126.com (R.Z.); 18865672173@163.com (Y.G.); hongbowangyt@163.com (H.W.); qinggmeng@163.com (Q.M.)

<sup>2</sup> Department of Biochemistry and Molecular Medicine, School of Medicine, University of California Davis, Sacramento, CA 95817, USA; ysysun@ucdavis.edu

\* Correspondence: lz1\_0\_0@126.com; Tel.: +86-0535-6706023

**Table S1.** Results of N<sup>1</sup>-alkylation of DHPMs reaction with different bases.

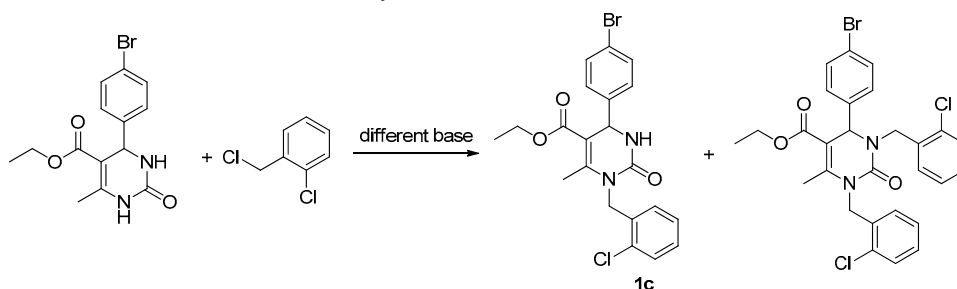

| Entry | Base                               | Additive | Reaction time (h) | Temperature (°C)  | N1-alkylation Yield <sup>a</sup> (%) | N1 and N3-dialkylation Yield (%) |
|-------|------------------------------------|----------|-------------------|-------------------|--------------------------------------|----------------------------------|
| 1     | potassium carbonate                | KI TBA   | 24                | r.t. <sup>b</sup> | \                                    | \                                |
| 2     | cesium carbonate                   | KI TBA   | 22                | r.t.              | 25                                   | 27                               |
| 3     | lithium hydroxide                  | KI TBA   | 22                | r.t.              | 12                                   | 31                               |
| 4     | sodium hydride                     | \        | 1.5               | 0-5 then r.t.     | 9                                    | 18                               |
| 5     | triethylamine                      | KI TBA   | 22                | r.t.              | \                                    | \                                |
| 6     | 1,8-diazabicyclo[5.4.0]undec-7-ene | KI TBA   | 22                | r.t.              | \                                    | \                                |
| 7     | tetramethylguanidine               | KI TBA   | 22                | r.t.              | \                                    | \                                |
| 8     | tetrabutylammonium hydroxide       | KI TBA   | 22                | r.t.              | 23                                   | NA                               |
| 9     | potassium tert-butoxide            | KI TBA   | 16                | r.t.              | 13                                   | 20                               |

<sup>a</sup> The separation yield.

<sup>b</sup> Room temperature.

**Table S2.** Orthogonal tests for N1-alkylation of DHPMs in tetrabutylammonium hydroxide system.

| Entry                   | Mole ratio of halohydrocarbons | Mole equivalent of base | Temperature (°C) | Reaction time (h) | Interval time <sup>a</sup> (h) | Phase transfer catalyst | Amount of solvent (ml/g) | N1-alkylation Yield (%) | N3-dialkylation Yield (%) |
|-------------------------|--------------------------------|-------------------------|------------------|-------------------|--------------------------------|-------------------------|--------------------------|-------------------------|---------------------------|
| 1                       | 1.5                            | 1.7                     | 15               | 24                | 1.5                            | TBA                     | 20                       | 17.2                    | NA                        |
| 2                       | 1.8                            | 1.7                     | 45               | 24                | 0.5                            | TBA                     | 10                       | 21.9                    | NA                        |
| 3                       | 1.5                            | 2.0                     | 45               | 24                | 1.5                            | \                       | 10                       | 21.2                    | NA                        |
| 4                       | 1.8                            | 2.0                     | 15               | 24                | 0.5                            | \                       | 20                       | 11.3                    | NA                        |
| 5                       | 1.5                            | 1.7                     | 45               | 16                | 0.5                            | \                       | 20                       | 21.6                    | NA                        |
| 6                       | 1.8                            | 1.7                     | 15               | 16                | 1.5                            | \                       | 10                       | 19.0                    | NA                        |
| 7                       | 1.5                            | 2.0                     | 15               | 16                | 0.5                            | TBA                     | 10                       | 15.4                    | NA                        |
| 8                       | 1.8                            | 2.0                     | 45               | 16                | 1.5                            | TBA                     | 20                       | 35.1                    | NA                        |
| Sum of low dose yields  | 77.5                           | 79.7                    | 62.9             | 91.1              | 70.2                           | 89.6                    | 77.5                     |                         |                           |
| Sum of high dose yields | 85.2                           | 83.0                    | 99.8             | 71.6              | 92.5                           | 73.1                    | 85.2                     |                         |                           |
| Range(R)                | 11.9                           | 3.3                     | 36.9             | 19.5              | 22.3                           | 16.5                    | 7.7                      |                         |                           |

<sup>a</sup> interval time between compound **1** and compound **2**.**Table S3.** Dataset used for Pharmacophore analysis.

| Cpd.      | Structure                                                                           | In Vitro Cell Viability |
|-----------|-------------------------------------------------------------------------------------|-------------------------|
| <b>1d</b> | 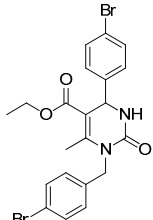 | 9.72 <sup>a</sup>       |

**1h**

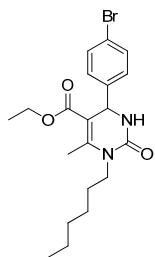

9.30 <sup>a</sup>

**1j**

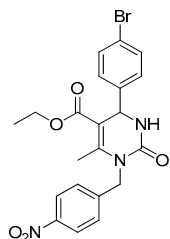

39.31 <sup>b</sup>

**3d**

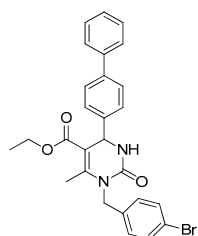

6.36 <sup>a</sup>

**3g**

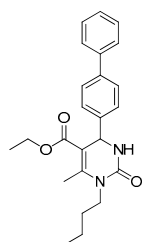

7.32 <sup>a</sup>

**3h**

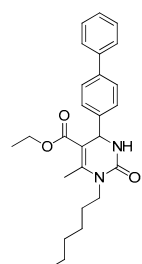

48.79 <sup>b</sup>

**1**

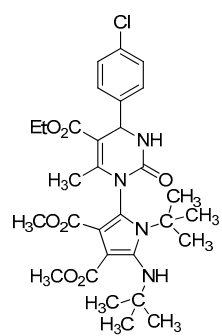

10.36 <sup>a</sup>

|   |                                                                                     |                   |
|---|-------------------------------------------------------------------------------------|-------------------|
| 2 | 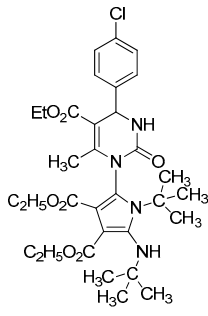   | 9.90 <sup>a</sup> |
| 3 |    | 0.68 <sup>a</sup> |
| 4 |    | 0.48 <sup>a</sup> |
| 5 |   | 1.41 <sup>a</sup> |
| 6 |  | 71 <sup>b</sup>   |
| 7 |  | 79 <sup>b</sup>   |

<sup>a</sup> Compounds **1d**, **1h**, **3d**, **3g**, **1**, **2**, **3**, **4** and **5** were IC<sub>50</sub> values (μM). <sup>b</sup> Compounds **1j**, **3h**, **6** and **7** were cytotoxic activity (%).
