# Supplementary figures and images for: Synthesis, Characterization, and Anticancer Activities Evaluation of Compounds Derived from 3,4-Dihydropyrimidin-2(1H)-one
Source: MDPI journal article supplement (doi:10.3390/molecules24050891), 2019-03-03

LZL20160323  
Liu2016032301-1H

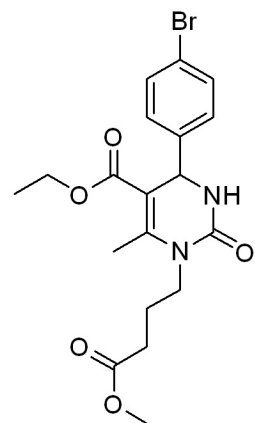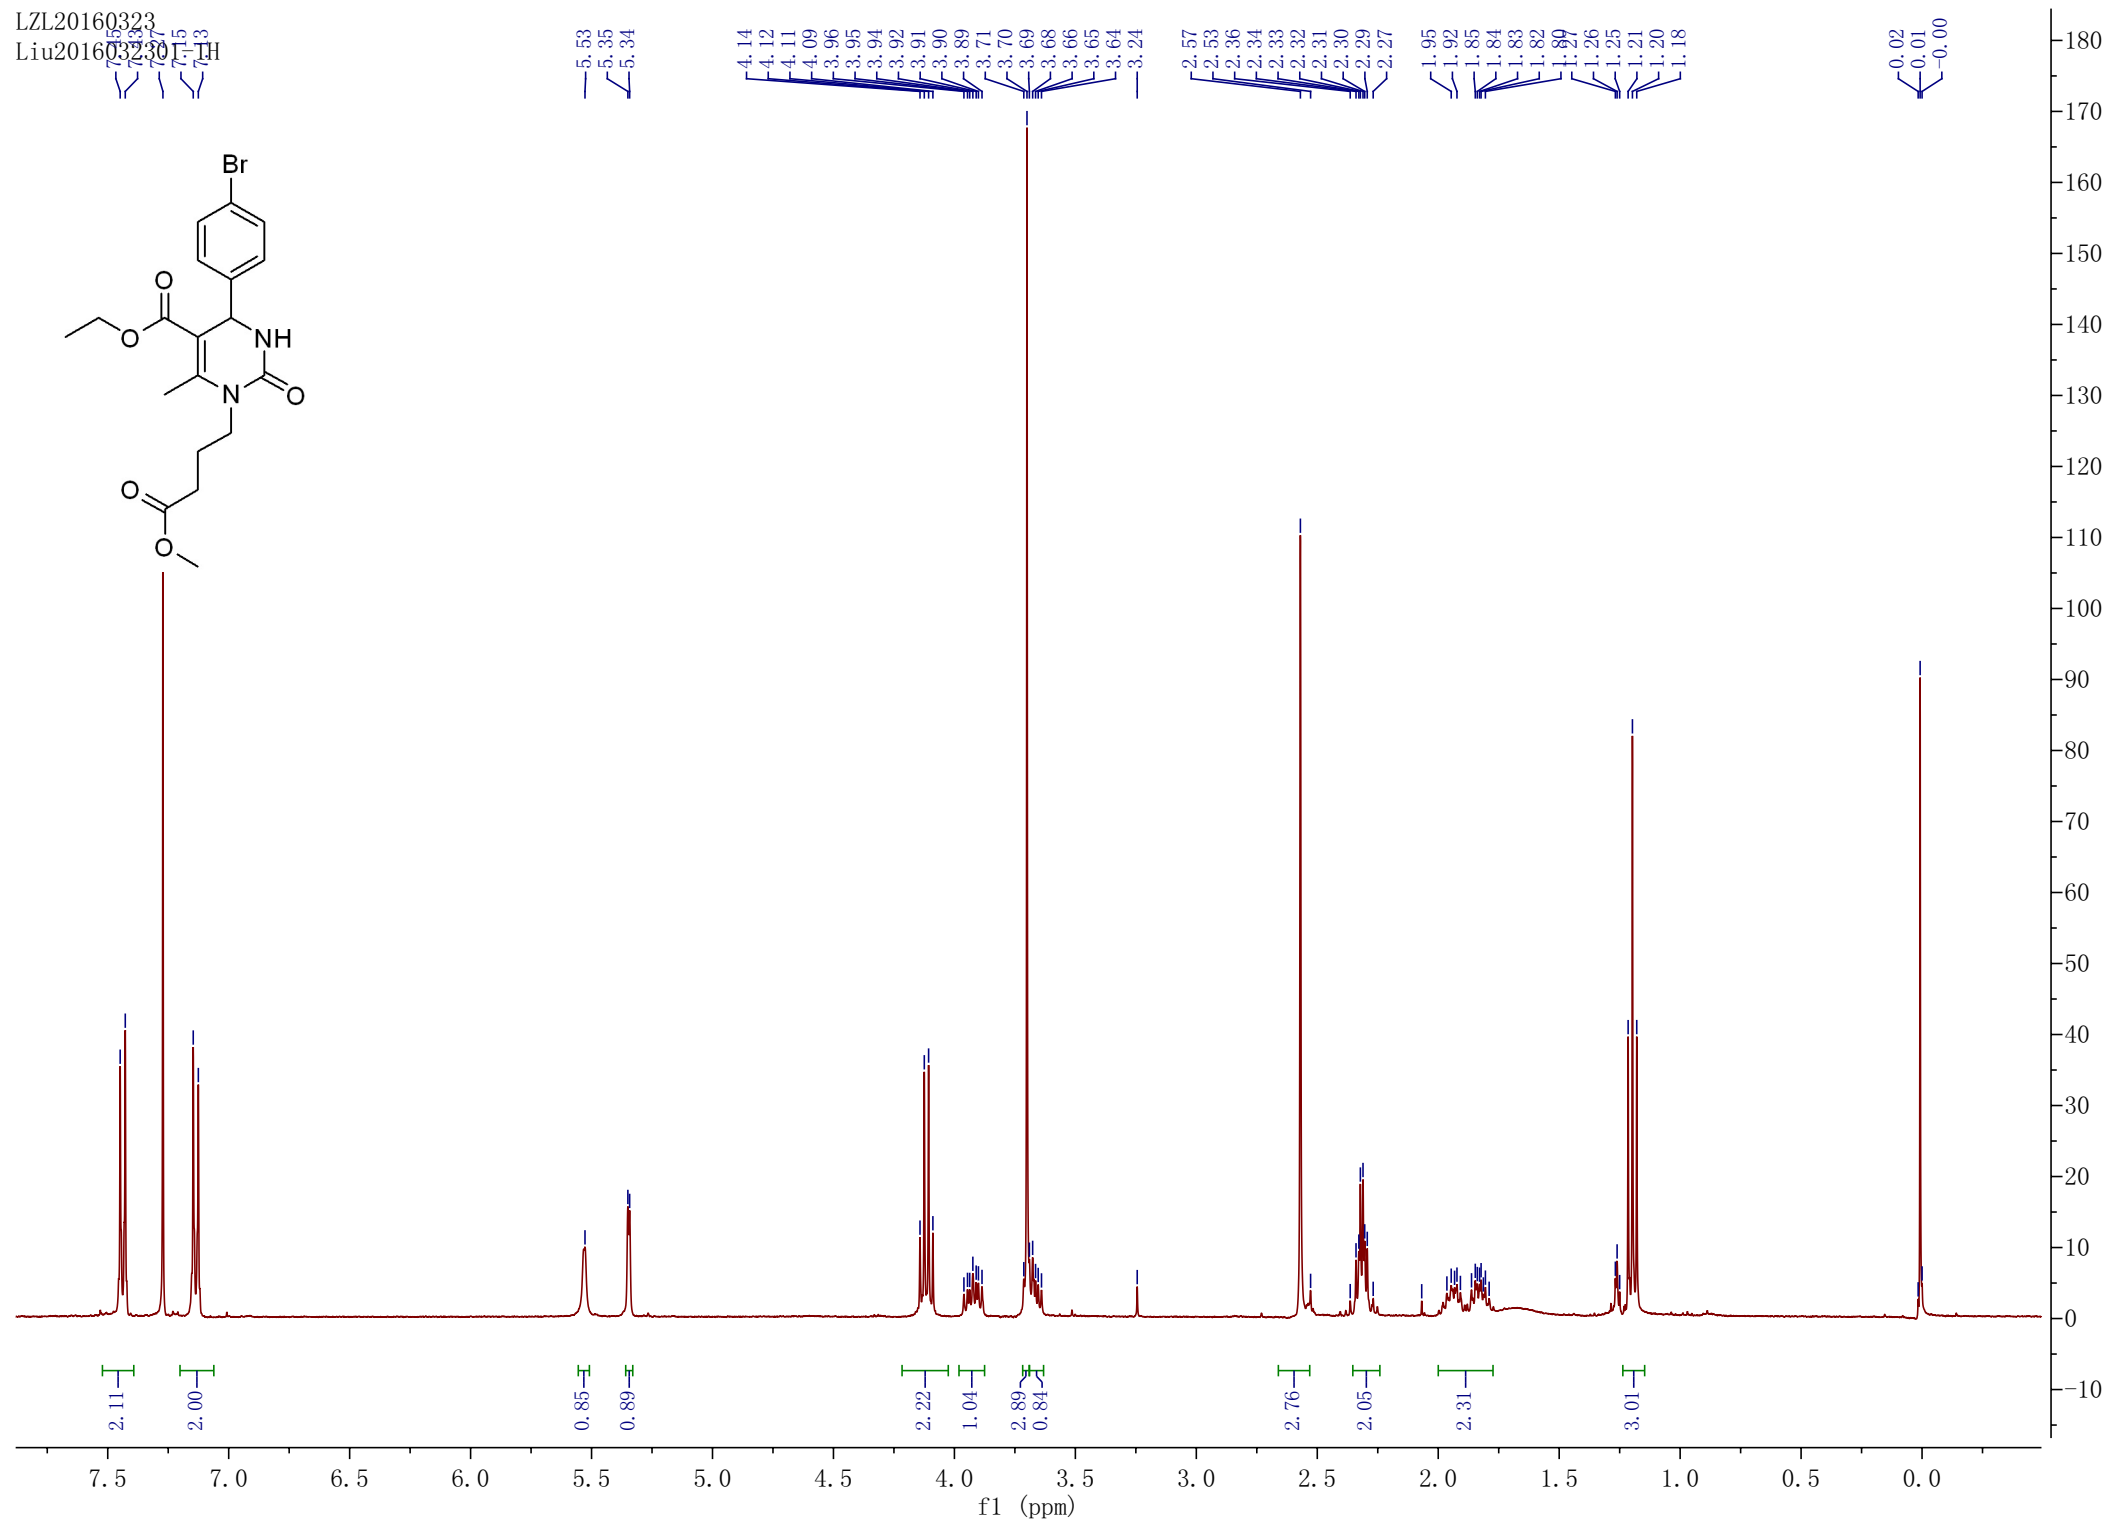

Supplement: s1 [file s1]

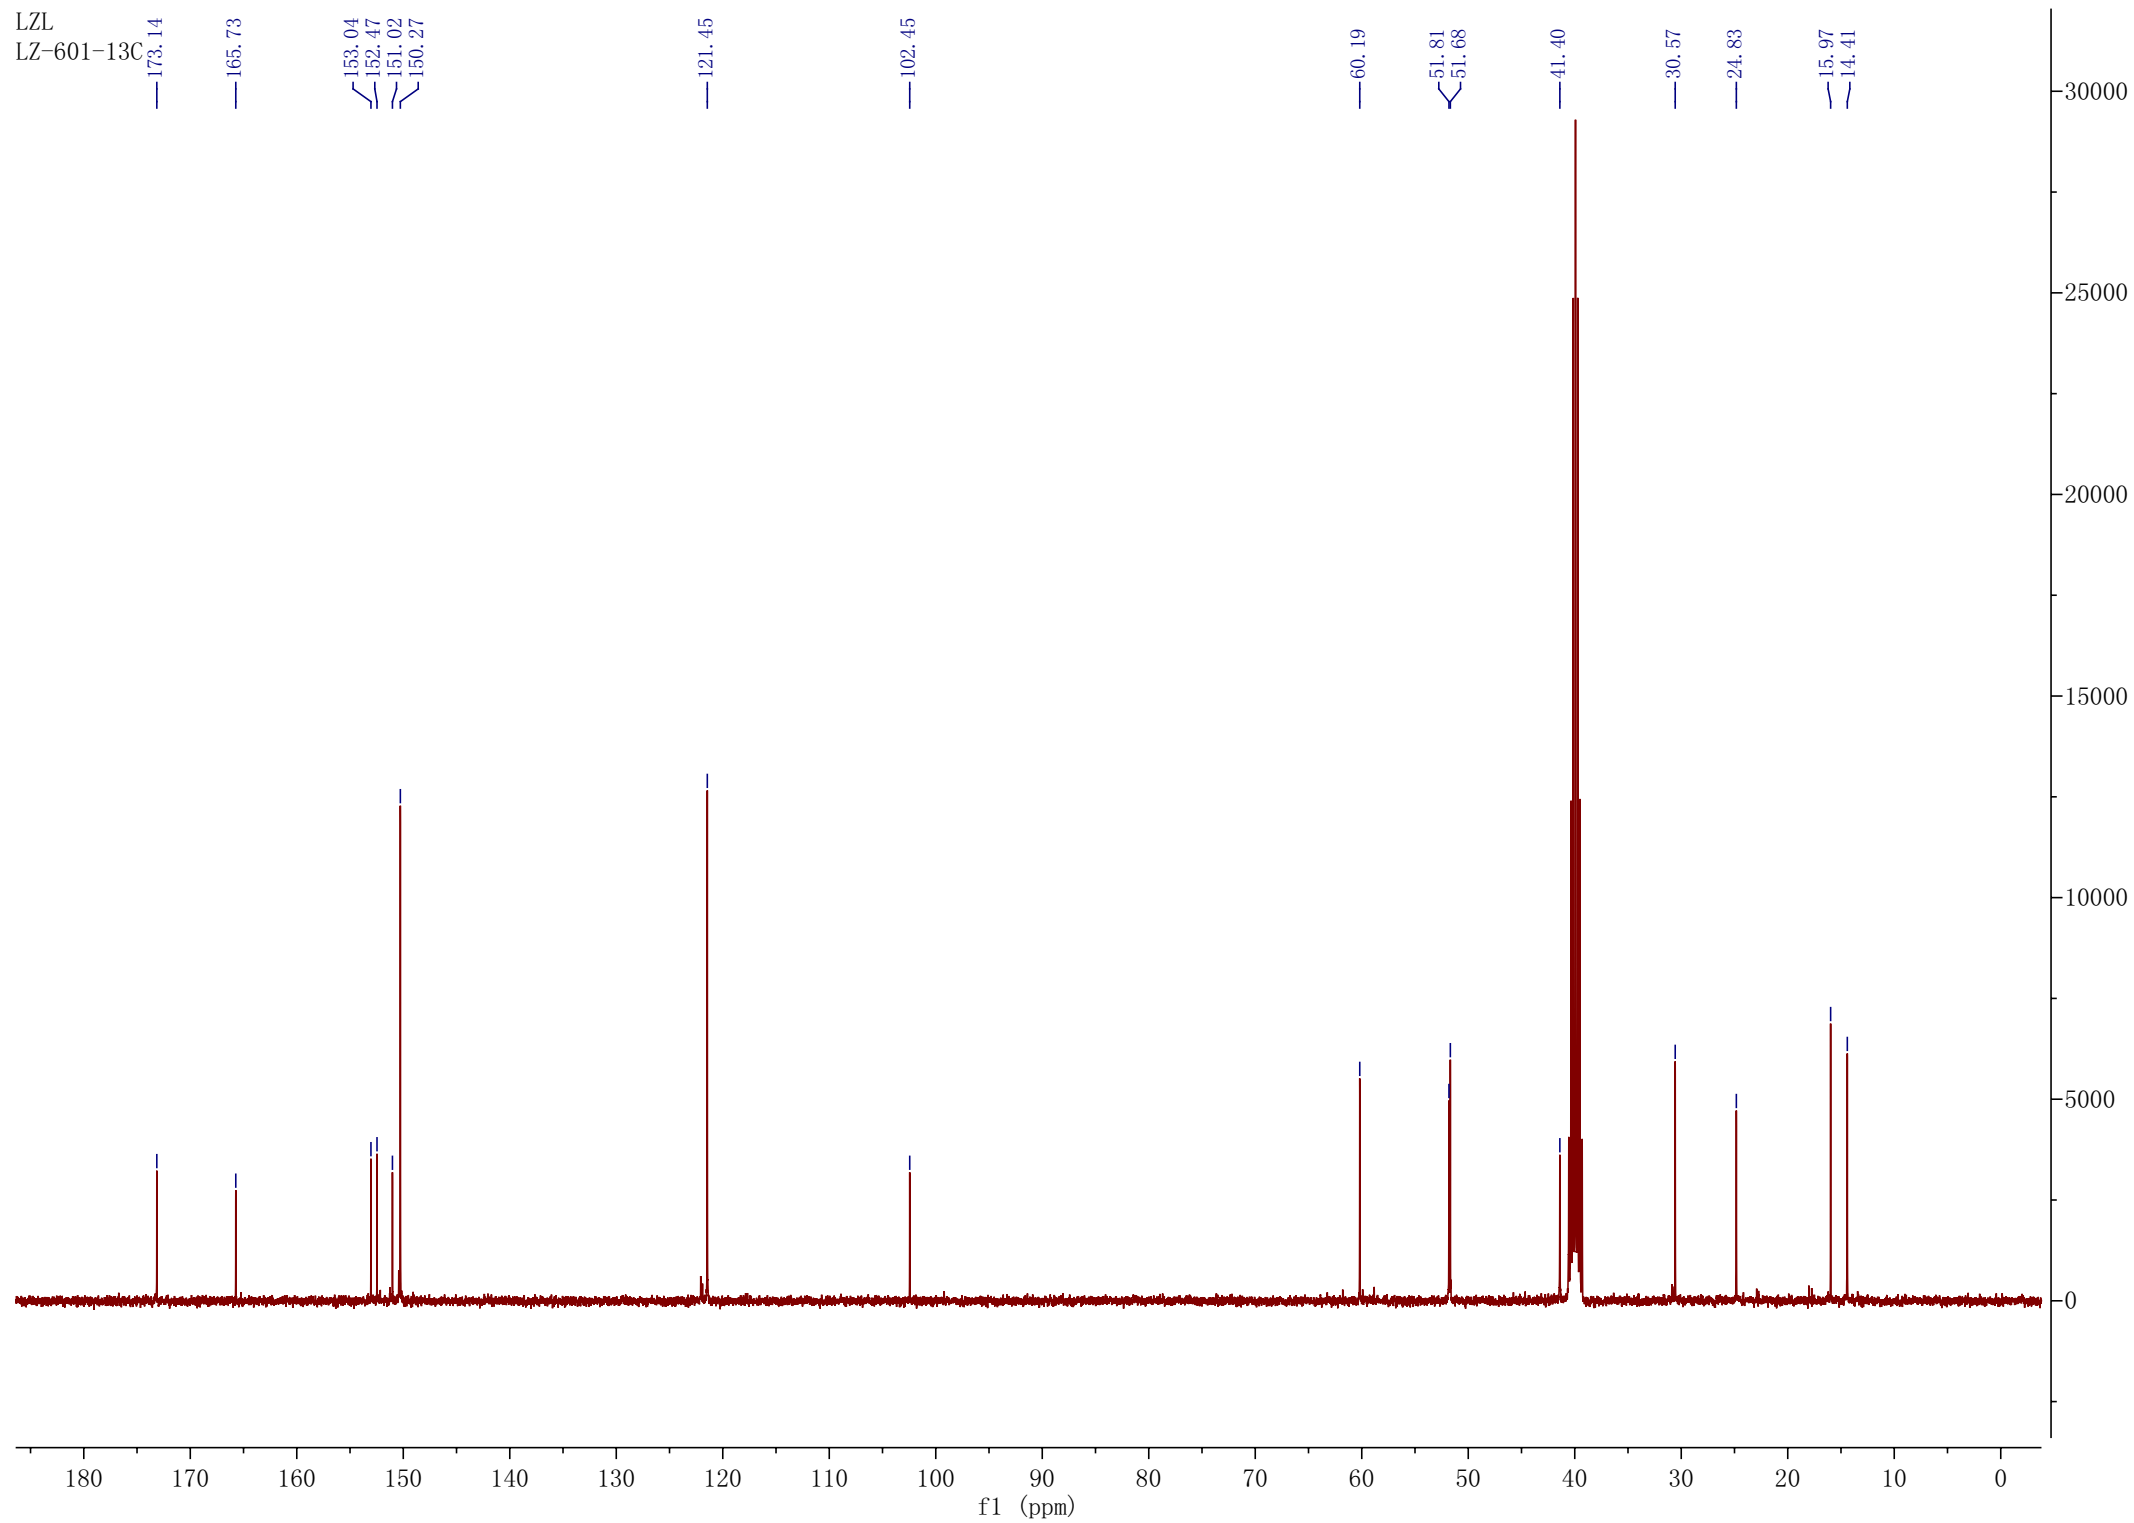

Supplement: s1 [file s1]

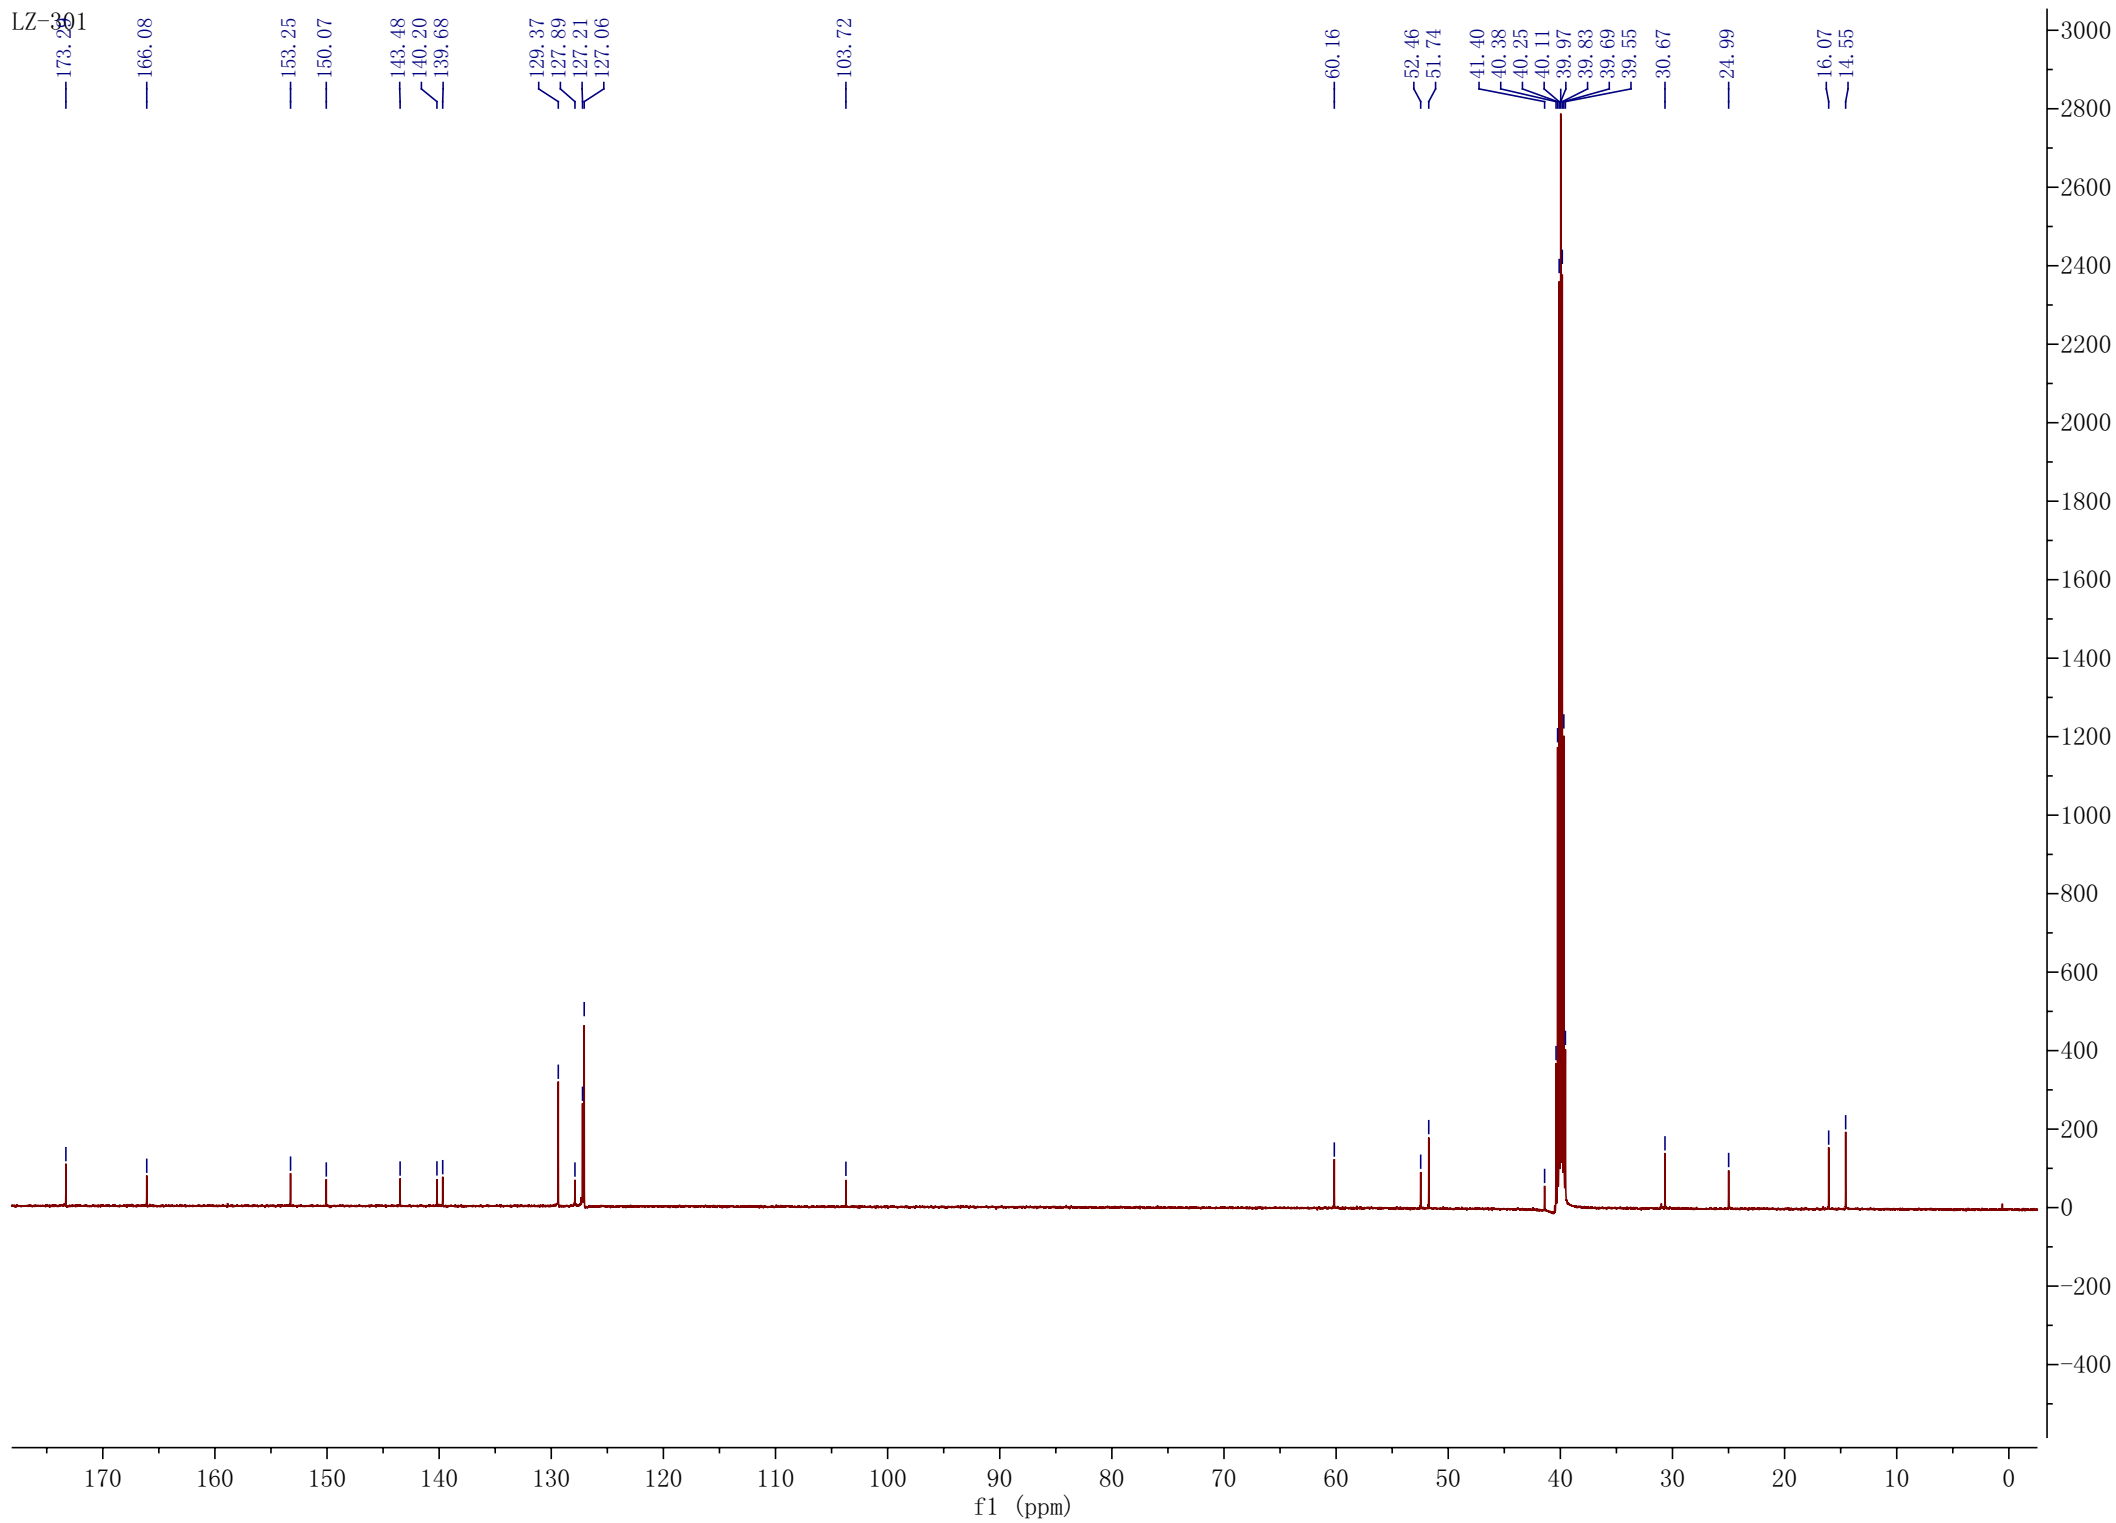

Supplement: s1 [file s1]

160928

Liu2016092803

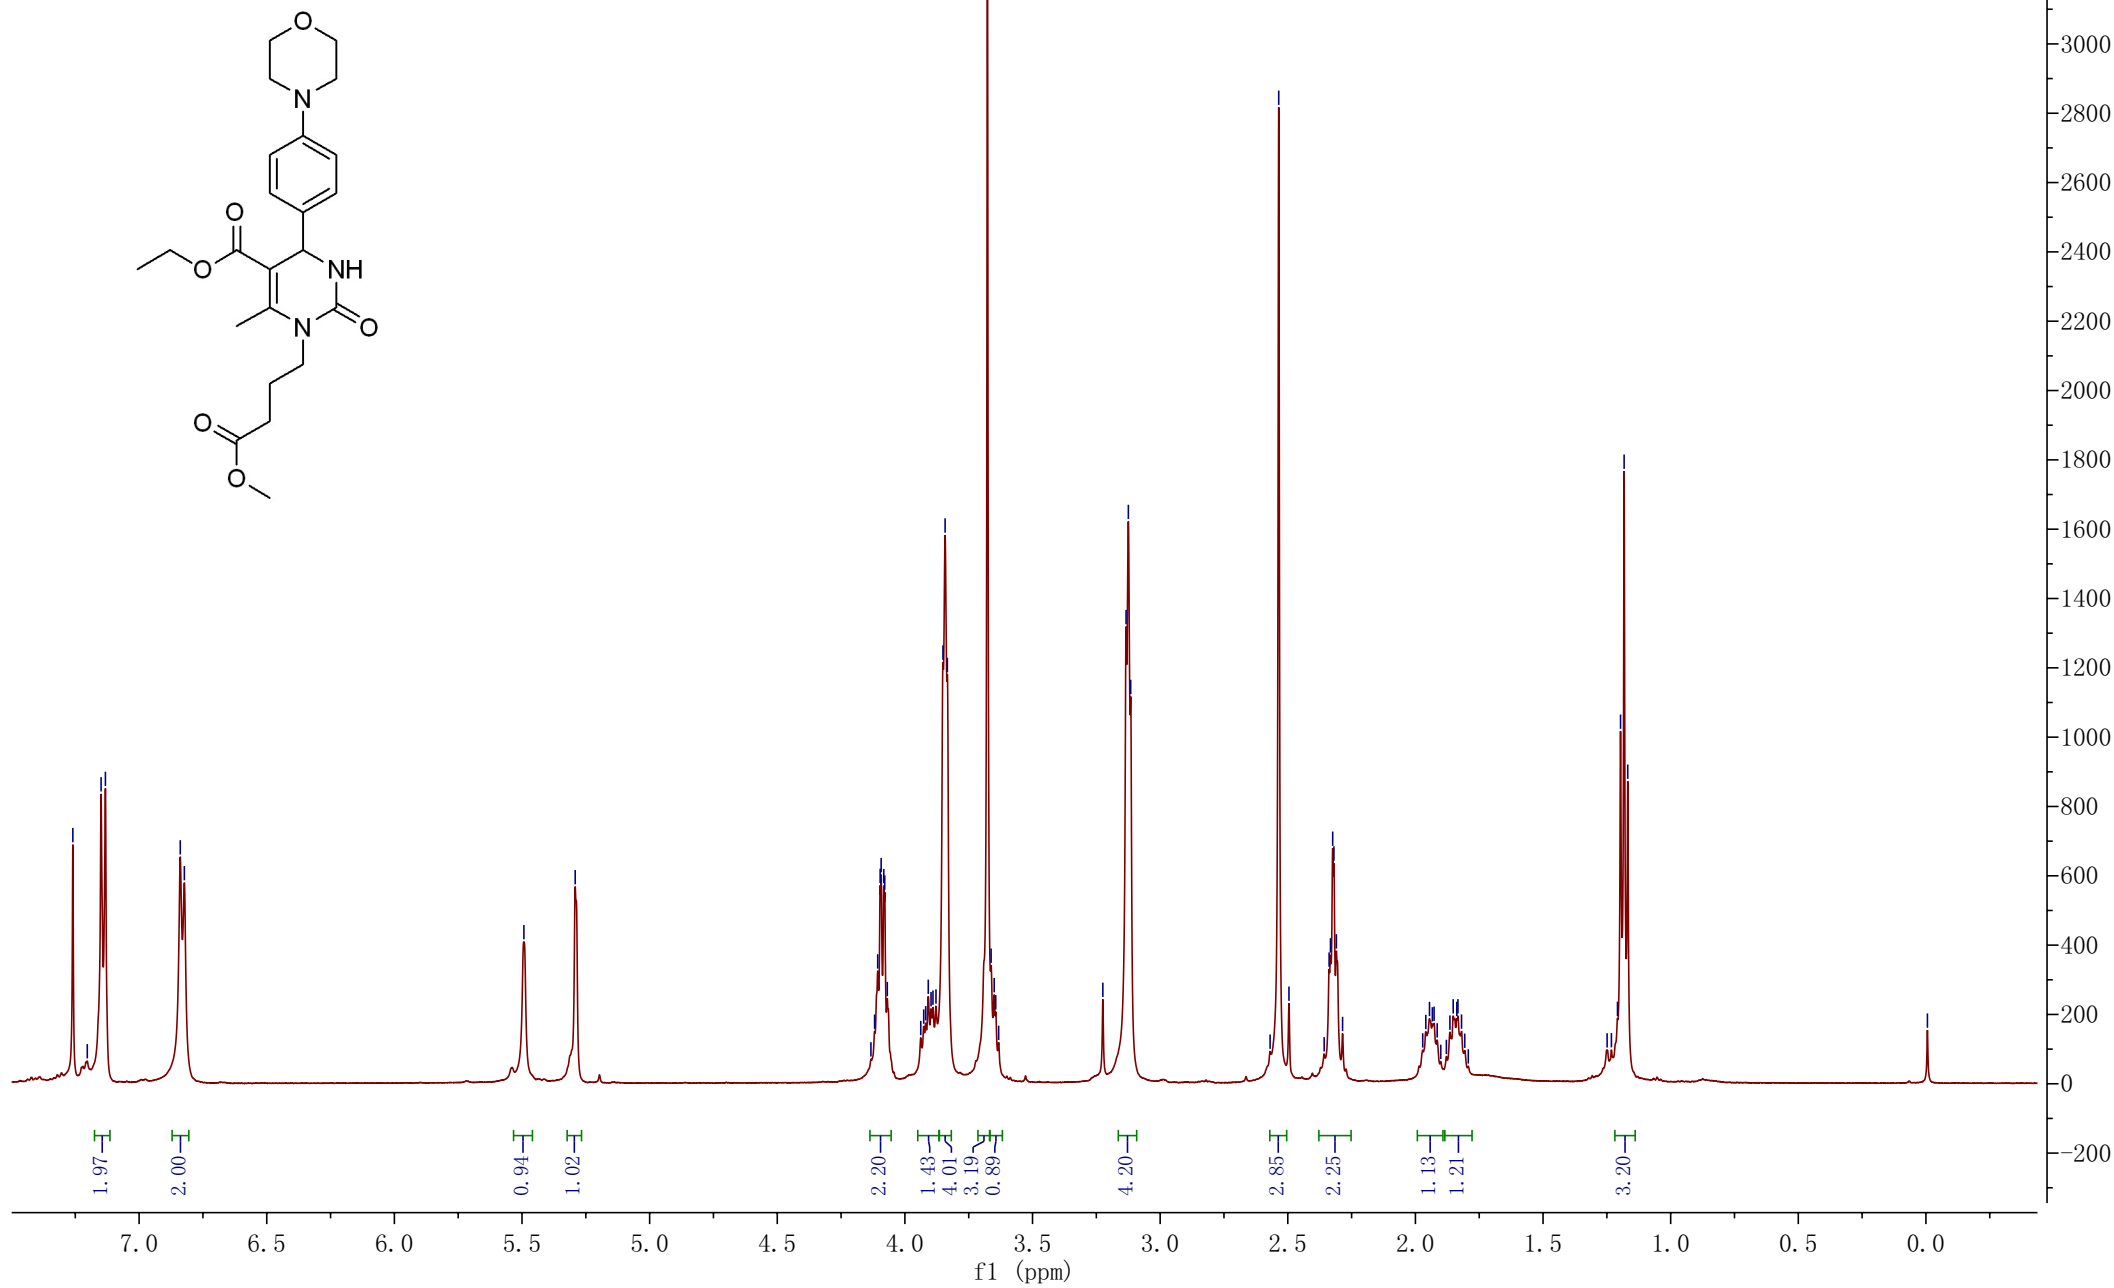

Supplement: s1 [file s1]

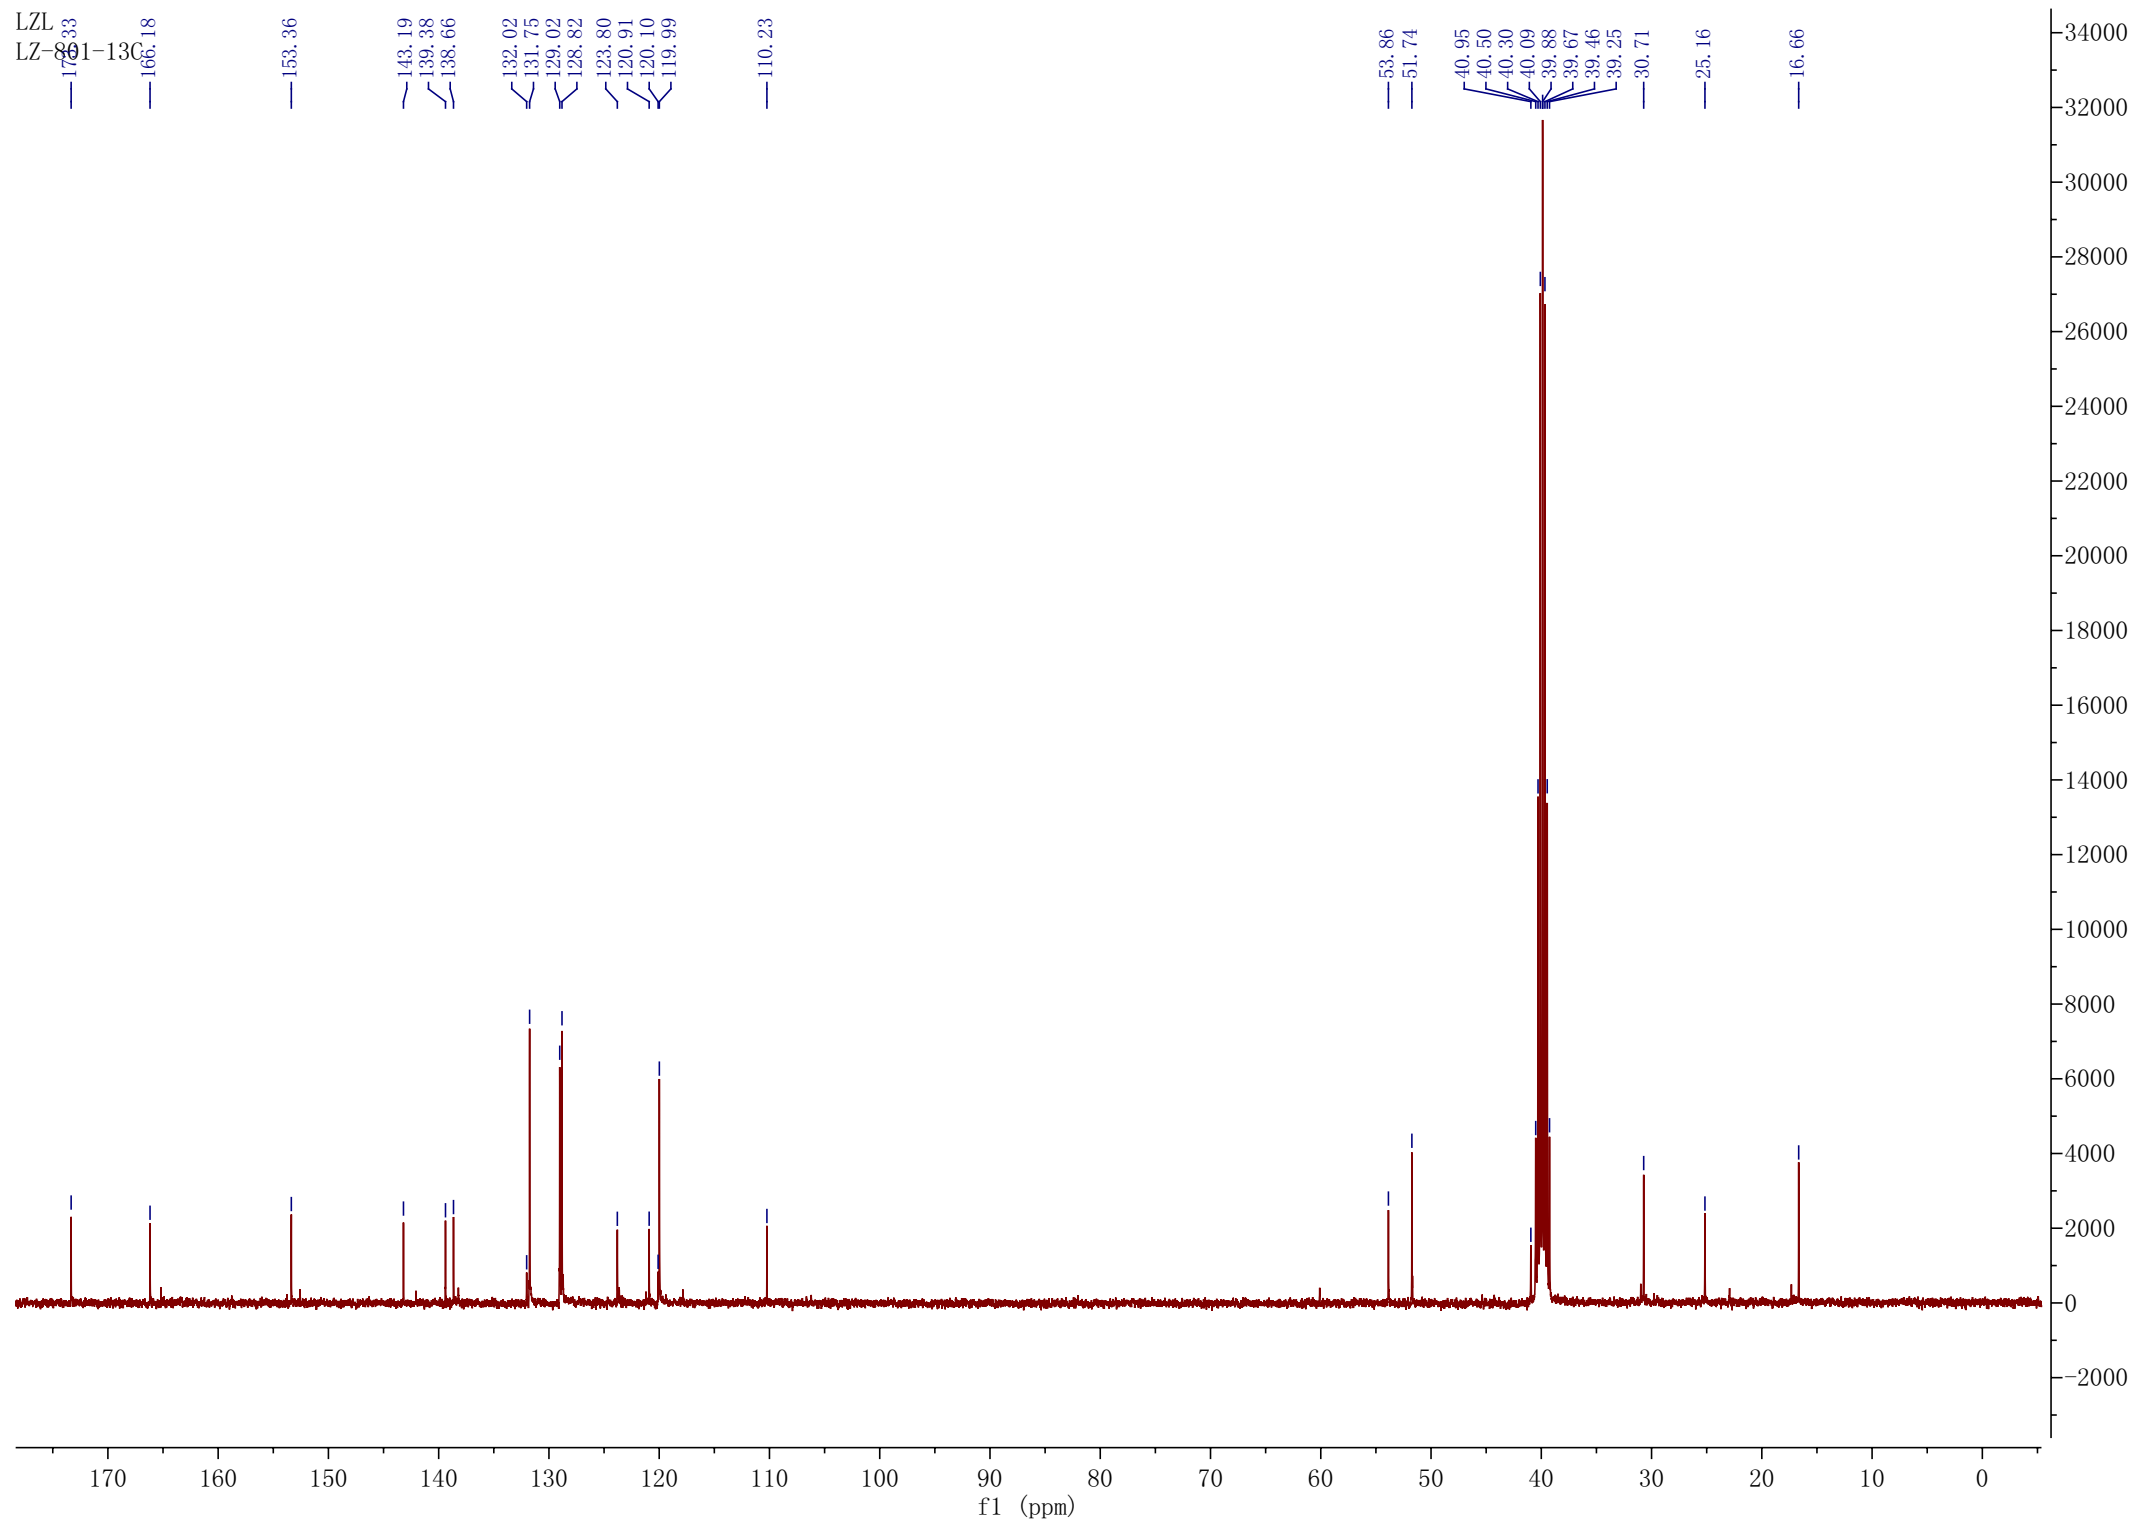

Supplement: s1 [file s1]

LZL20170419  
Liu2017041903-1H

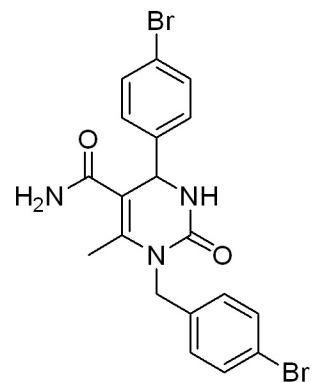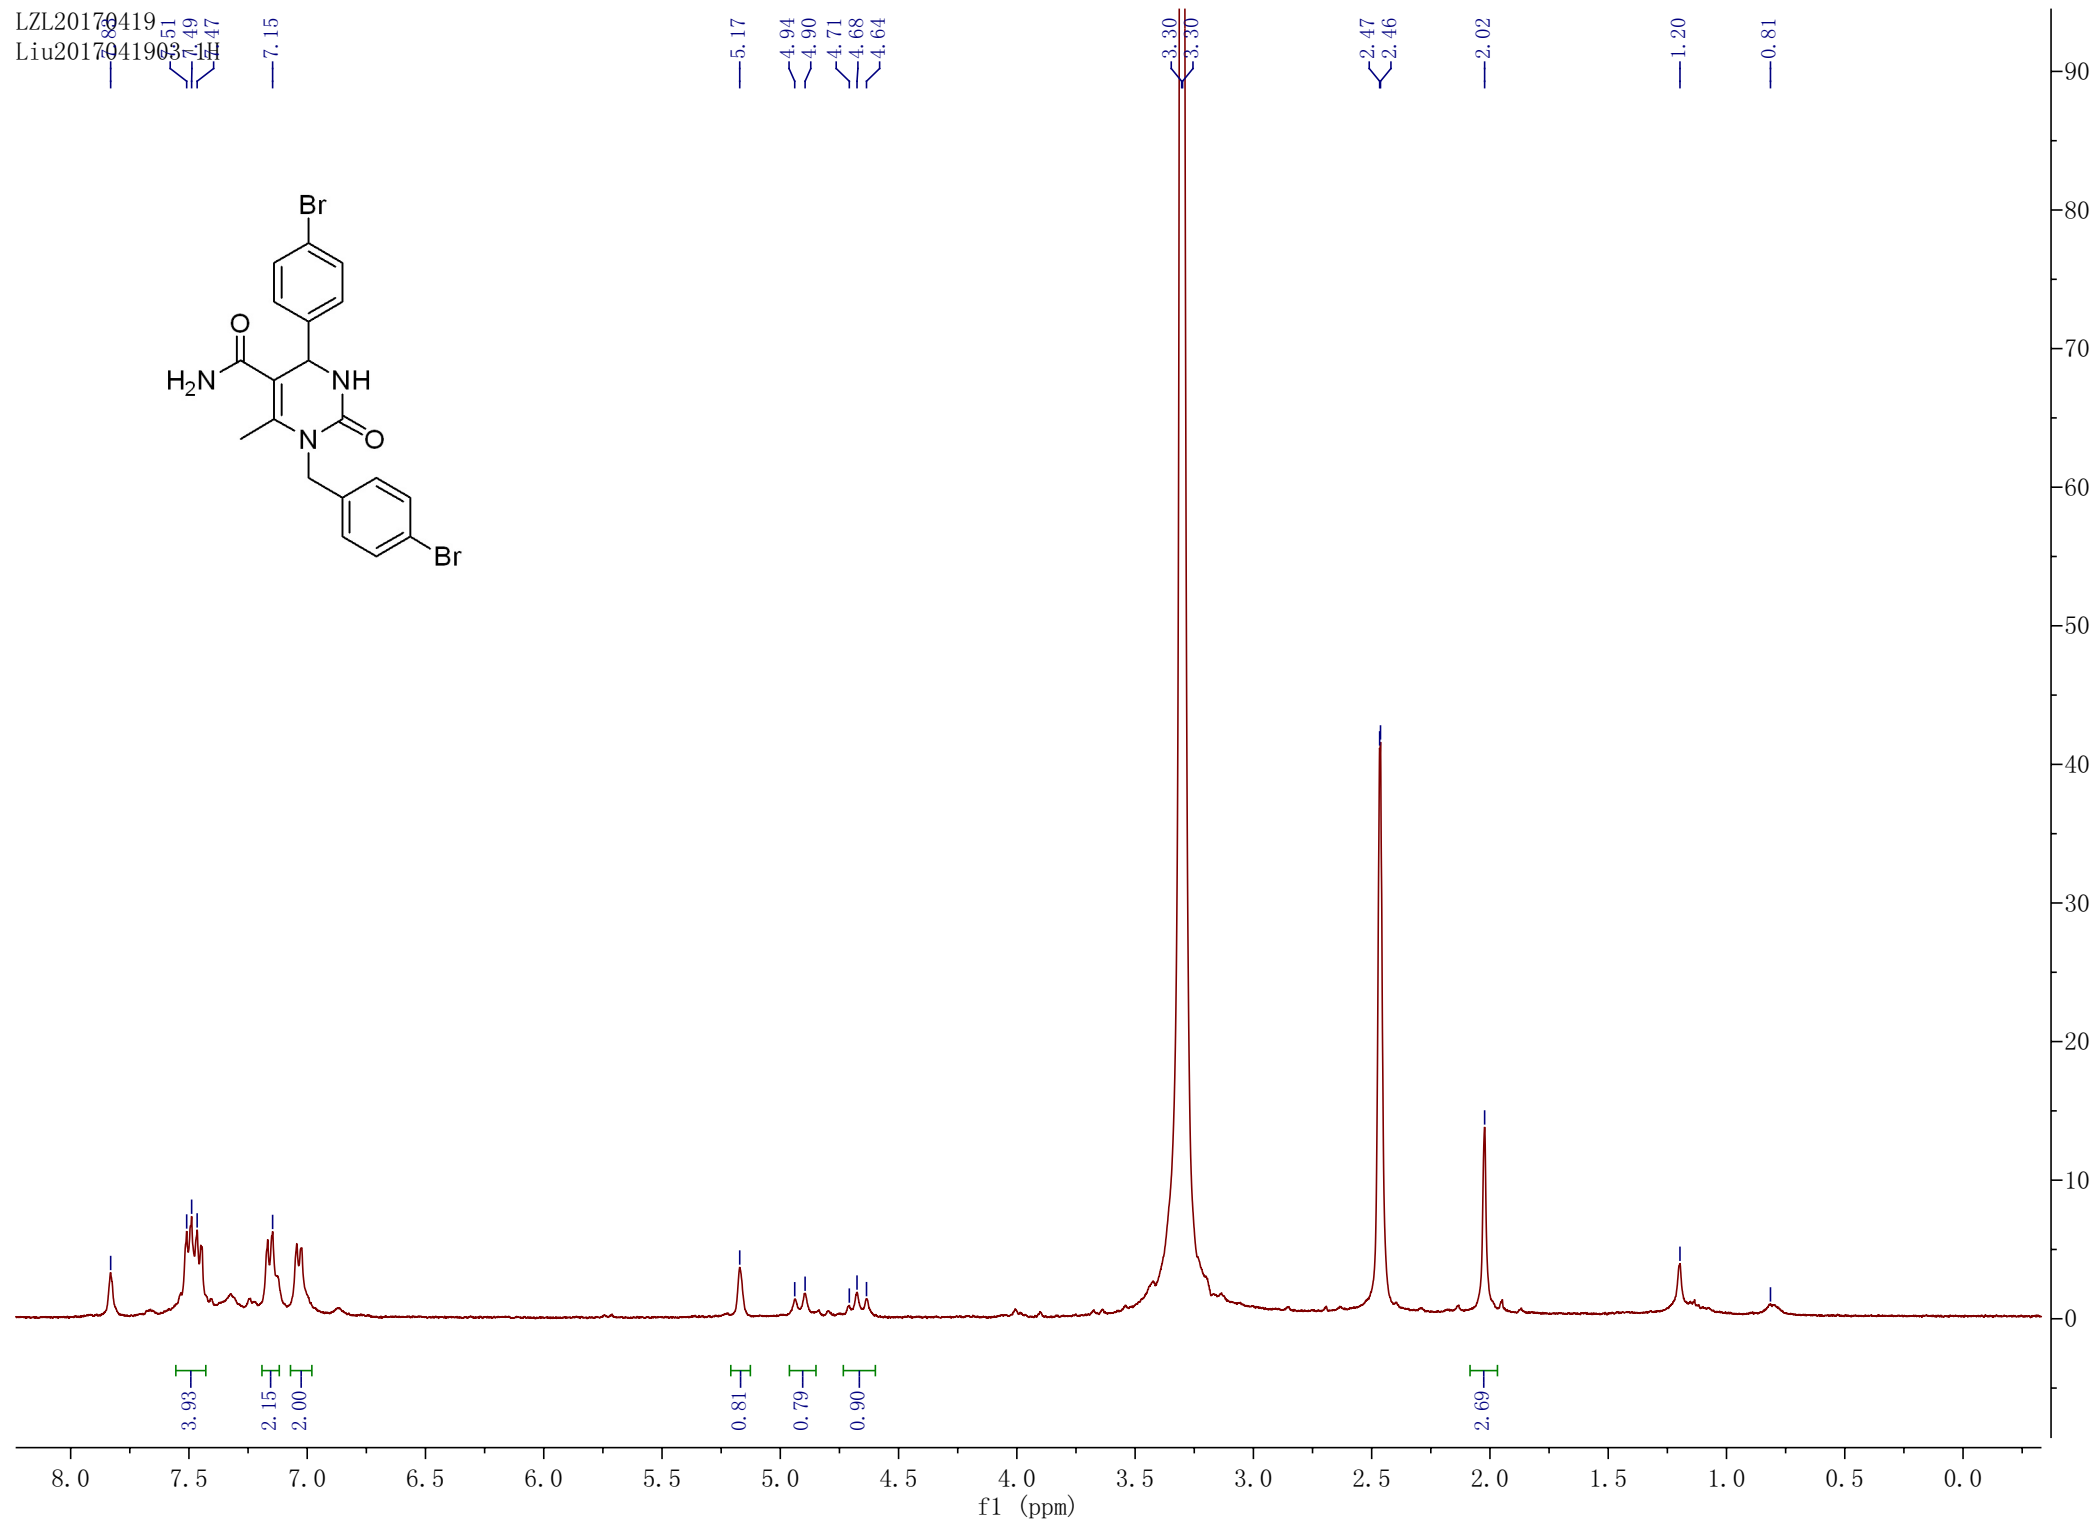

Supplement: s1 [file s1]

LZ103  
single pulse decoupled gated NOE

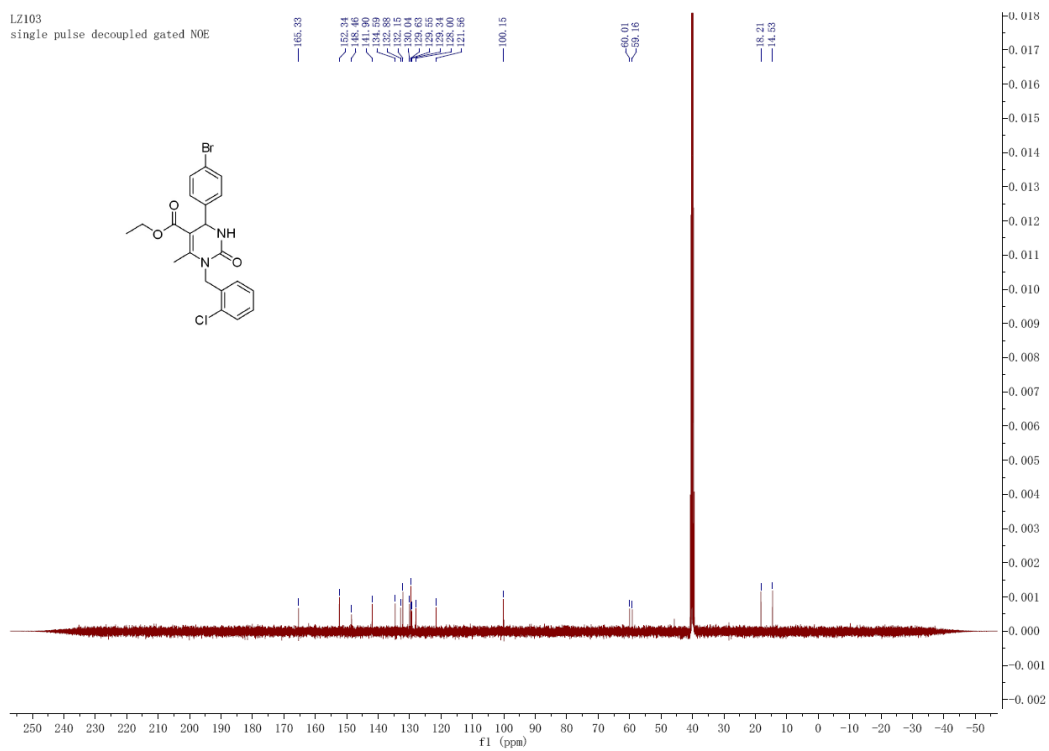

Supplement: s1 [file s1]

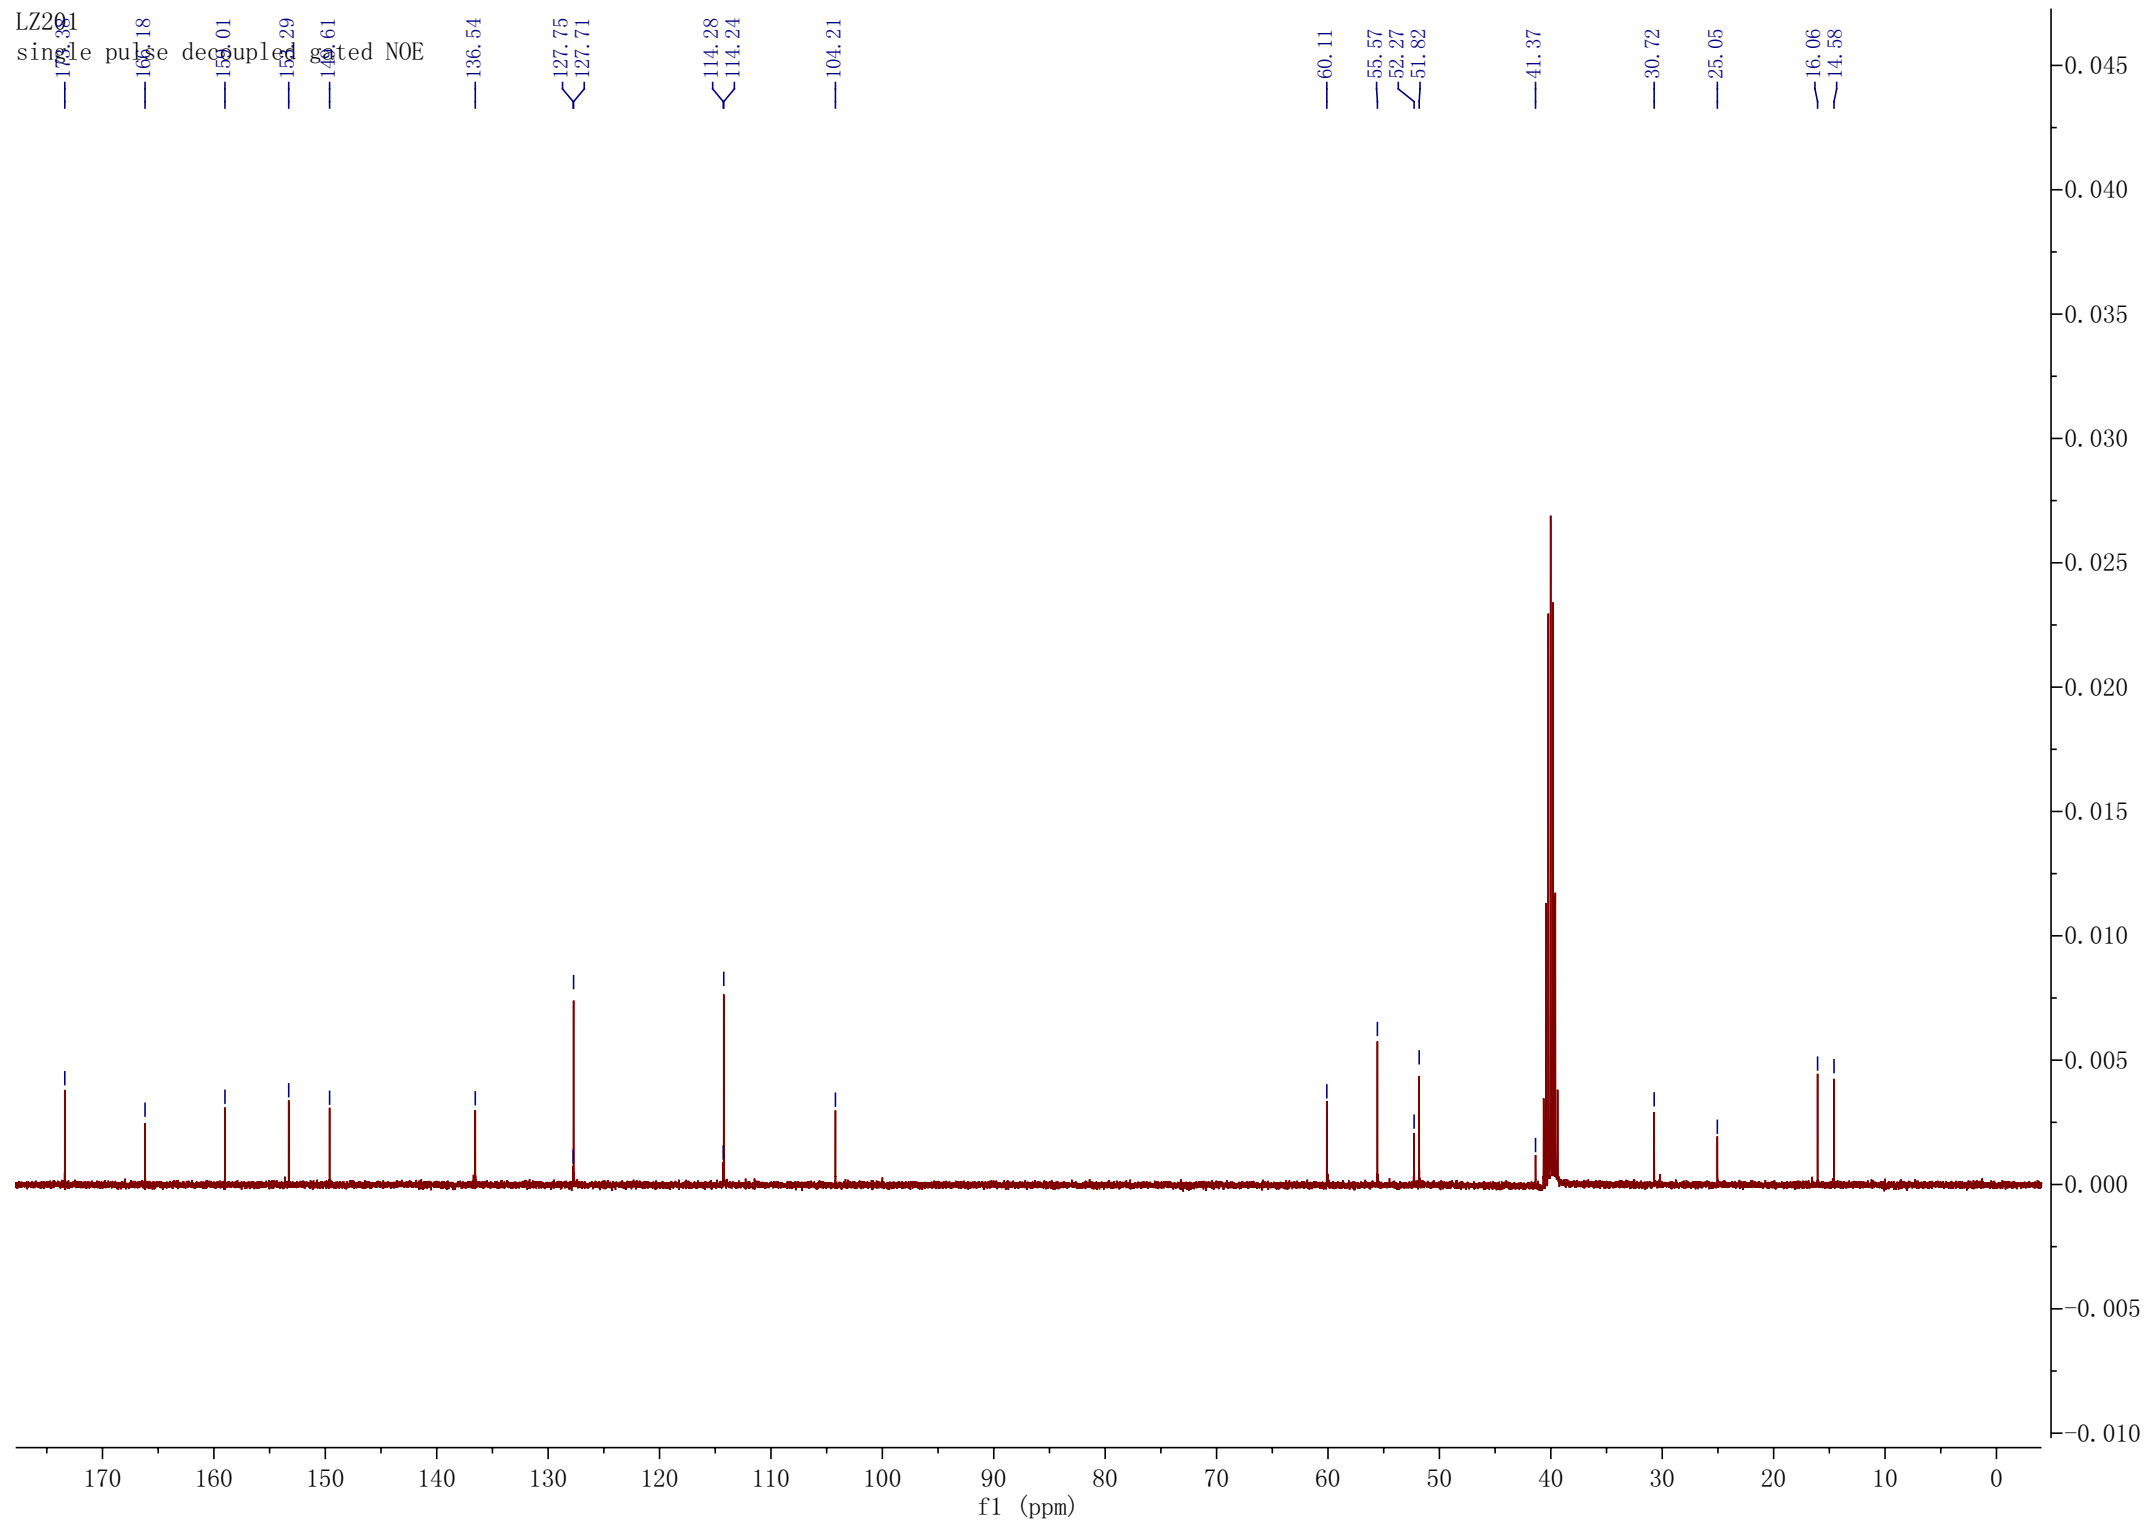

Supplement: s1 [file s1]

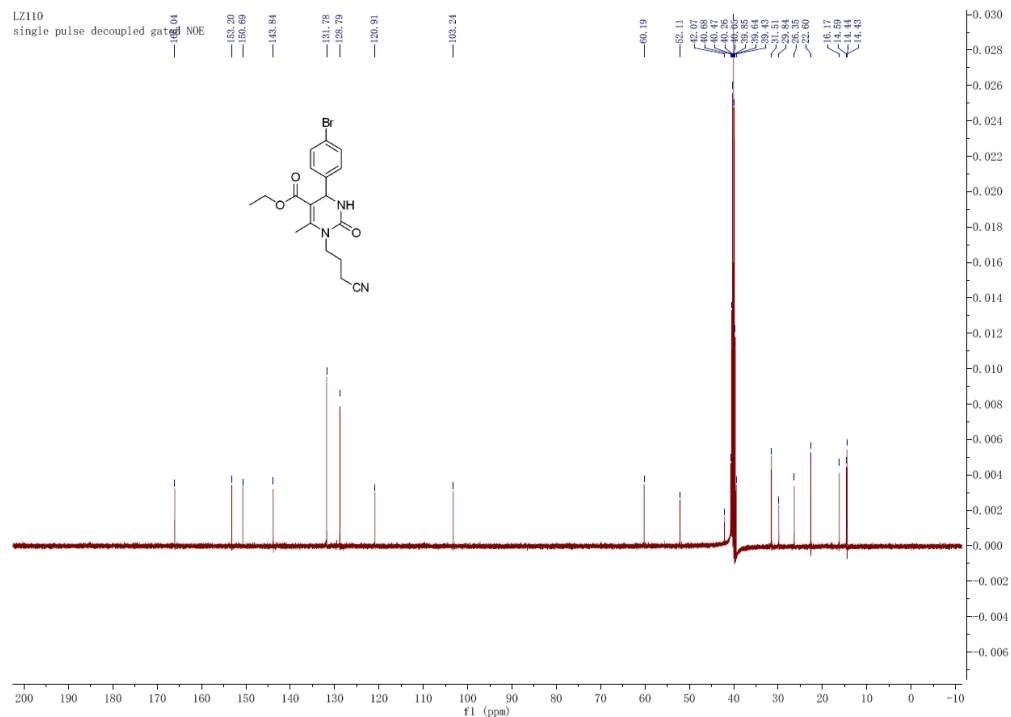

Supplement: s1 [file s1]

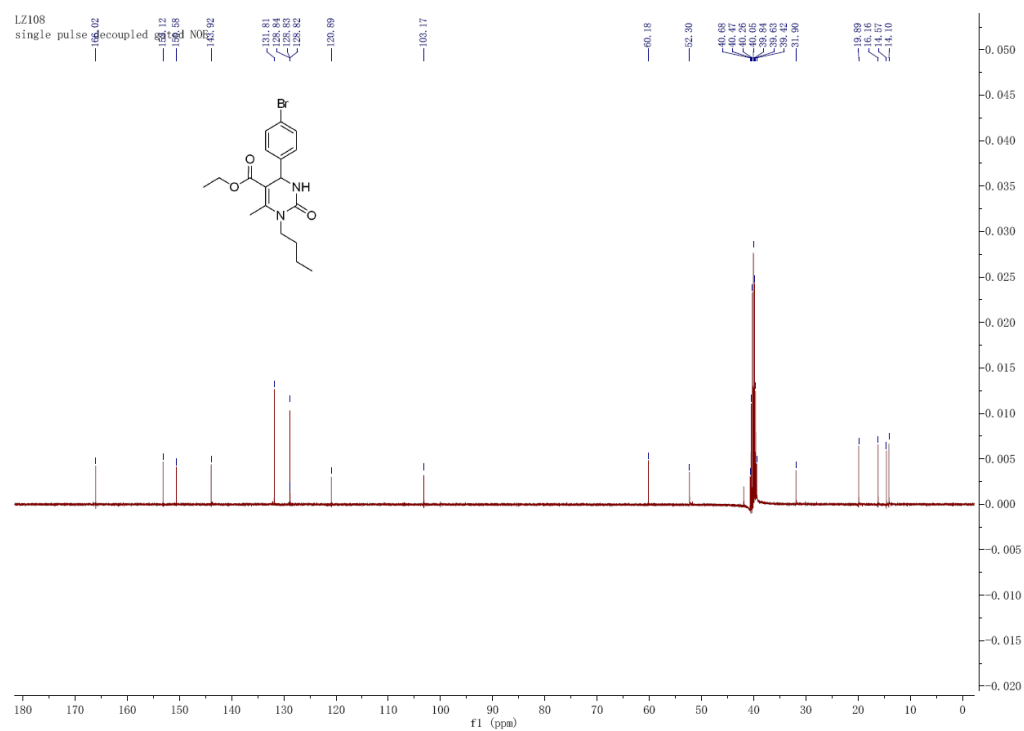

Supplement: s1 [file s1]

LZL20170702

Liu2017070202-11

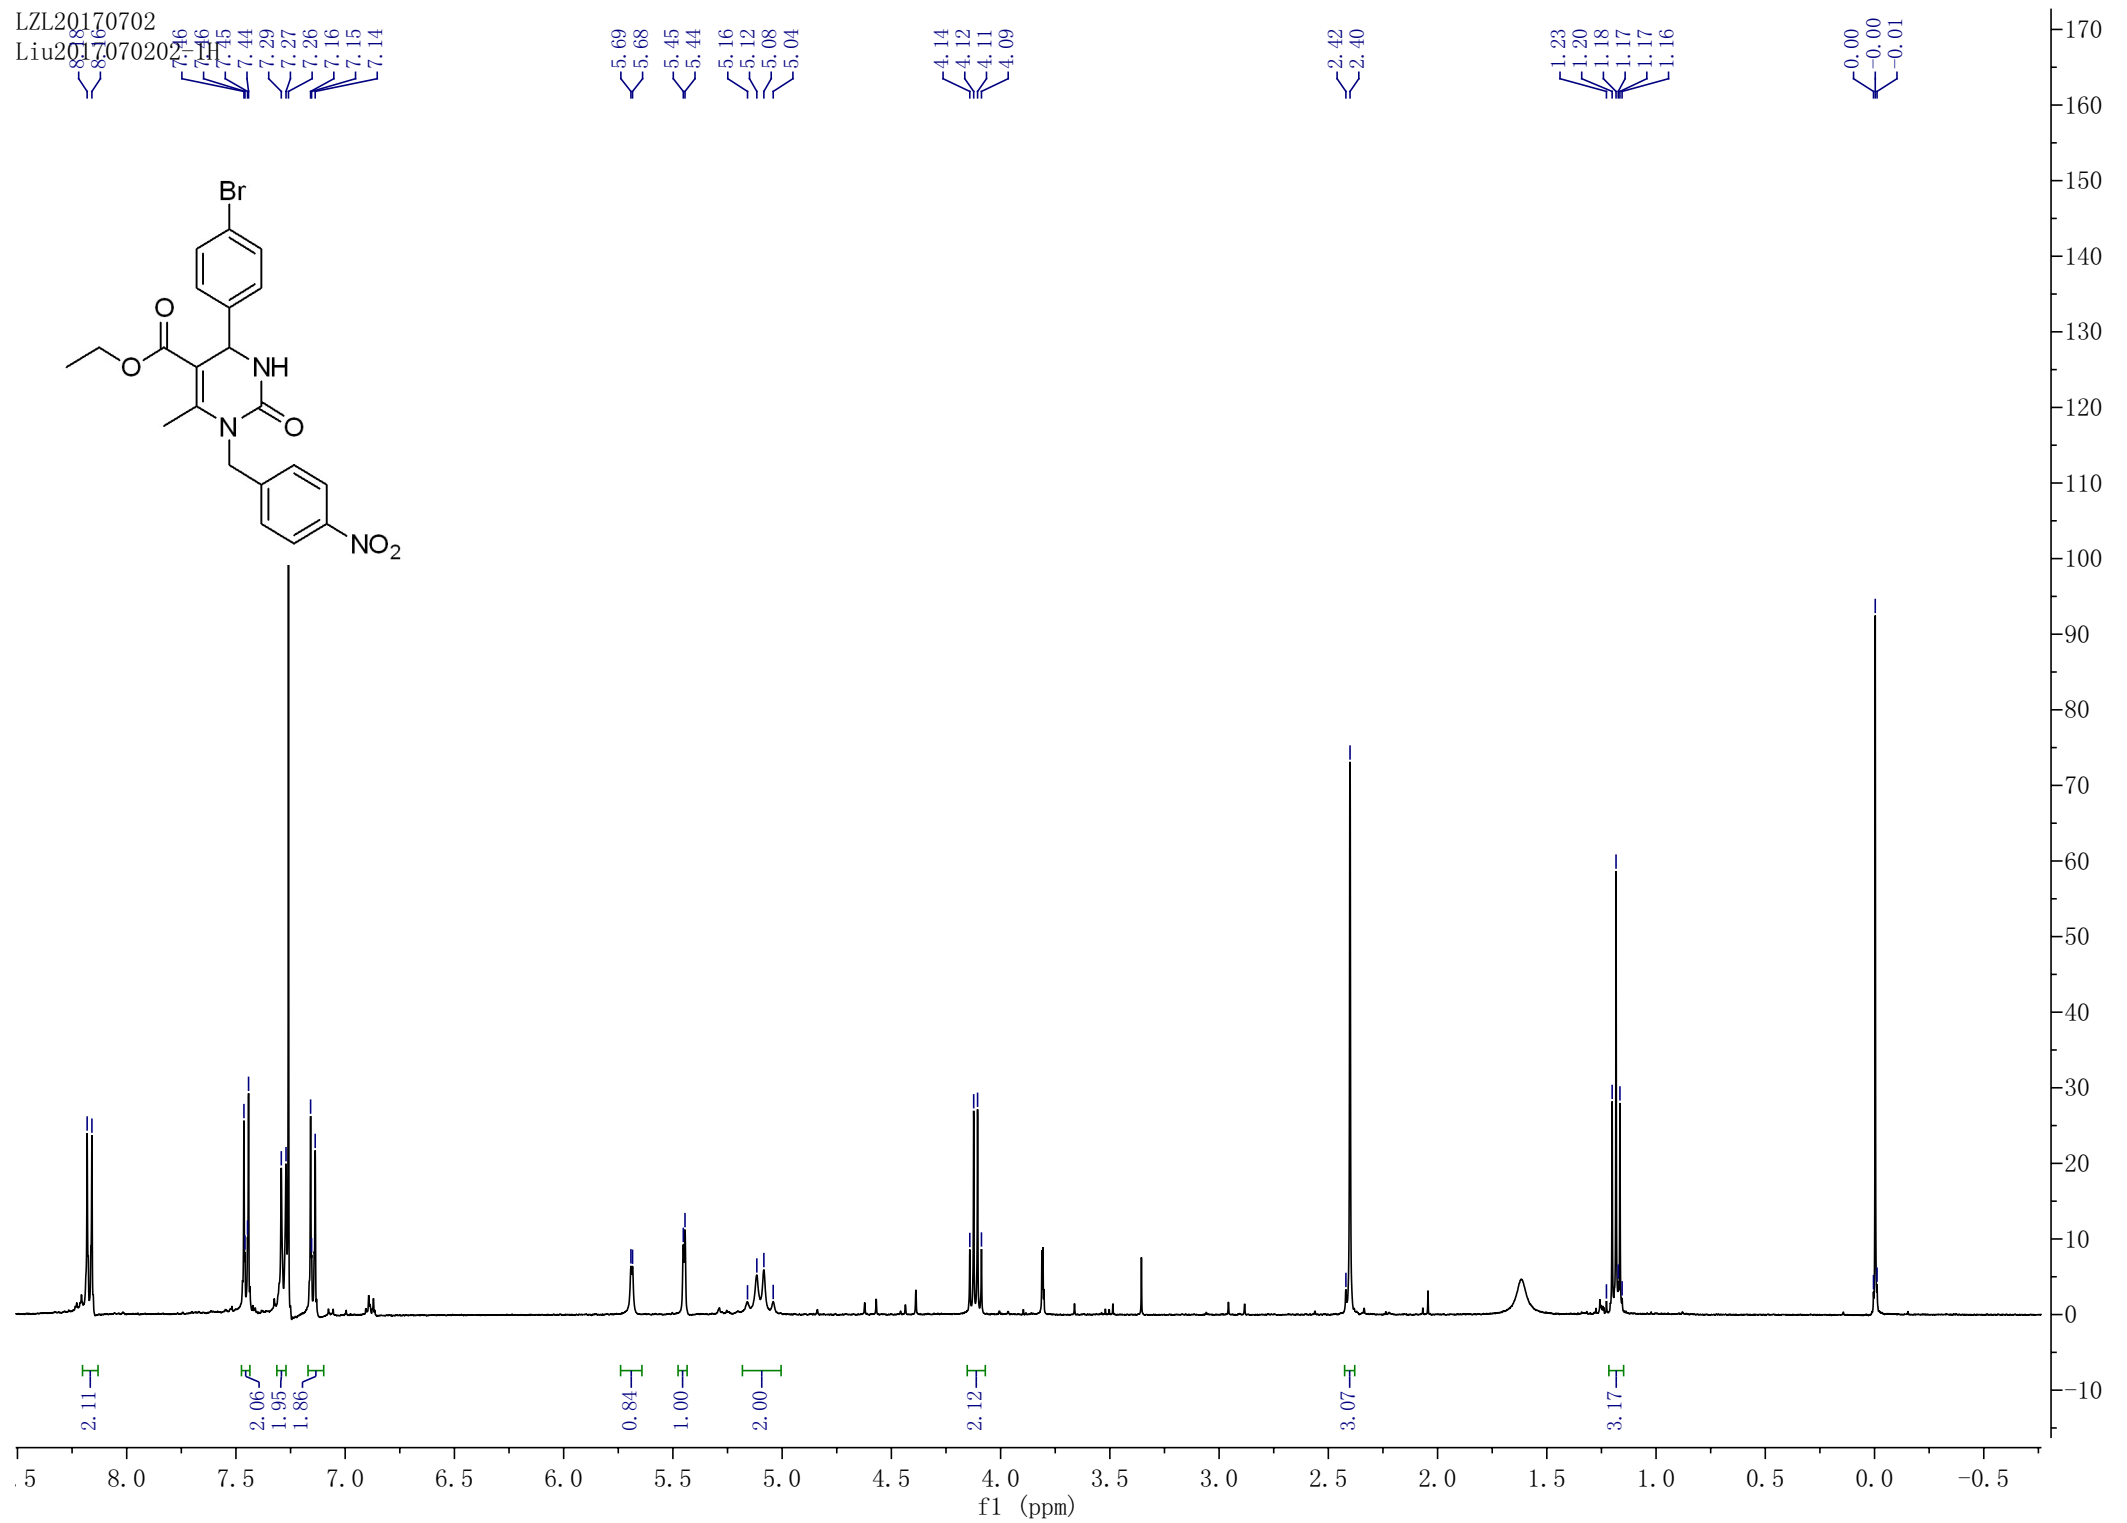

Supplement: s1 [file s1]

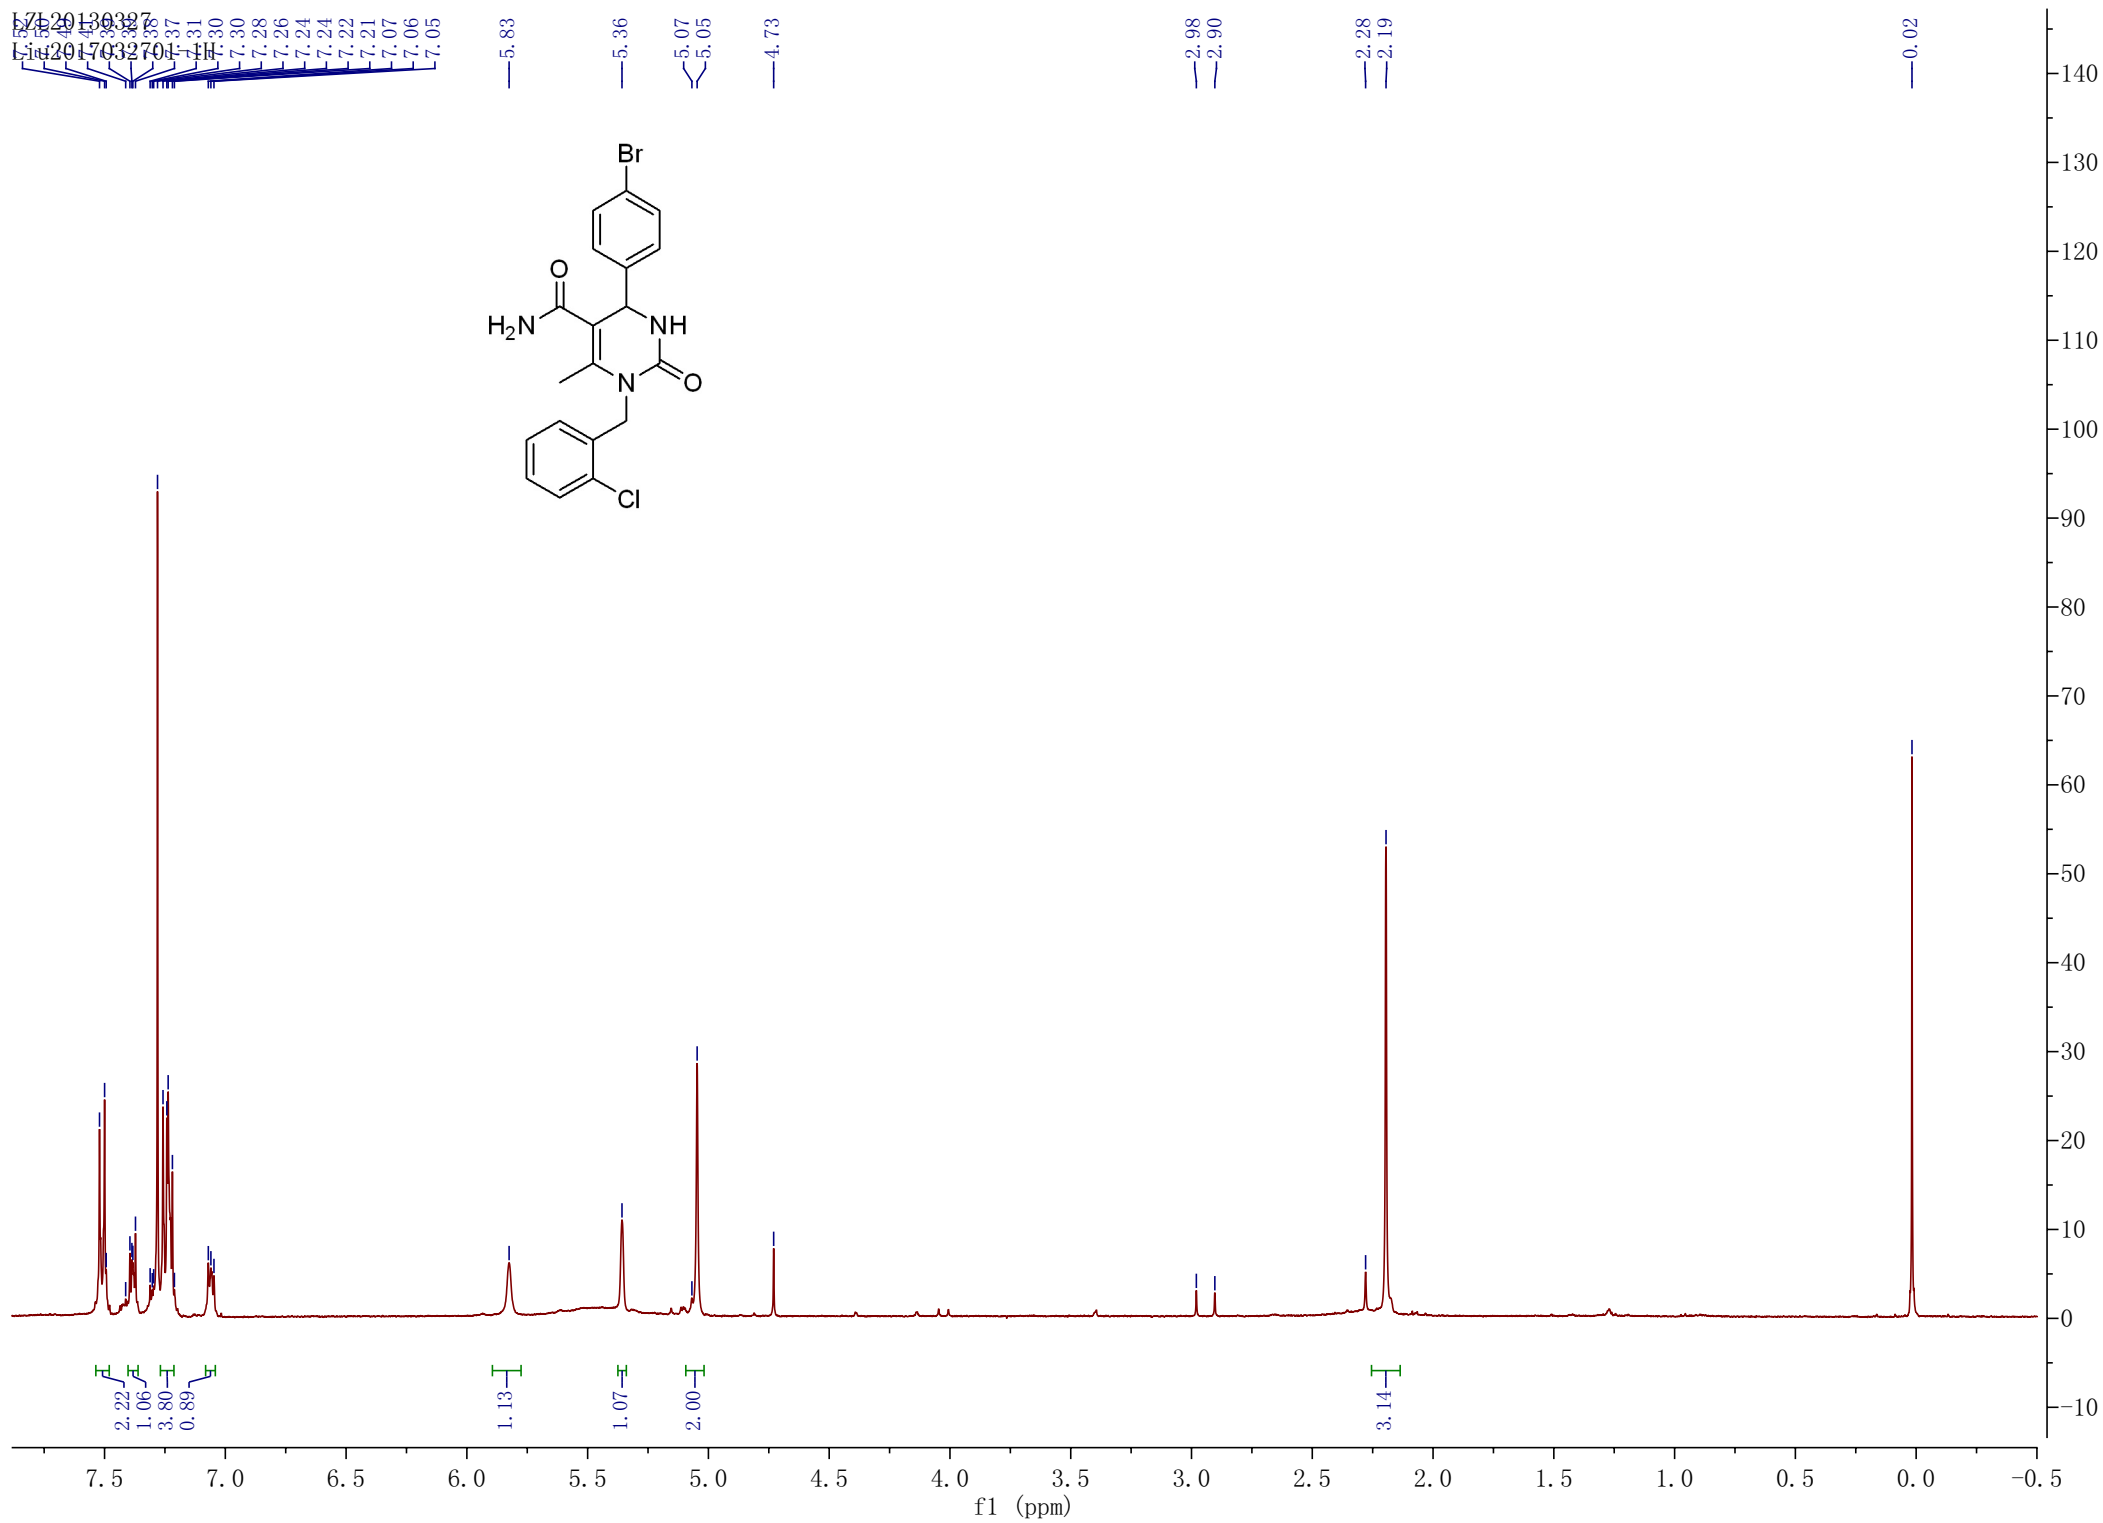

Supplement: s1 [file s1]

LZ120160617  
Liu2016061702-1H

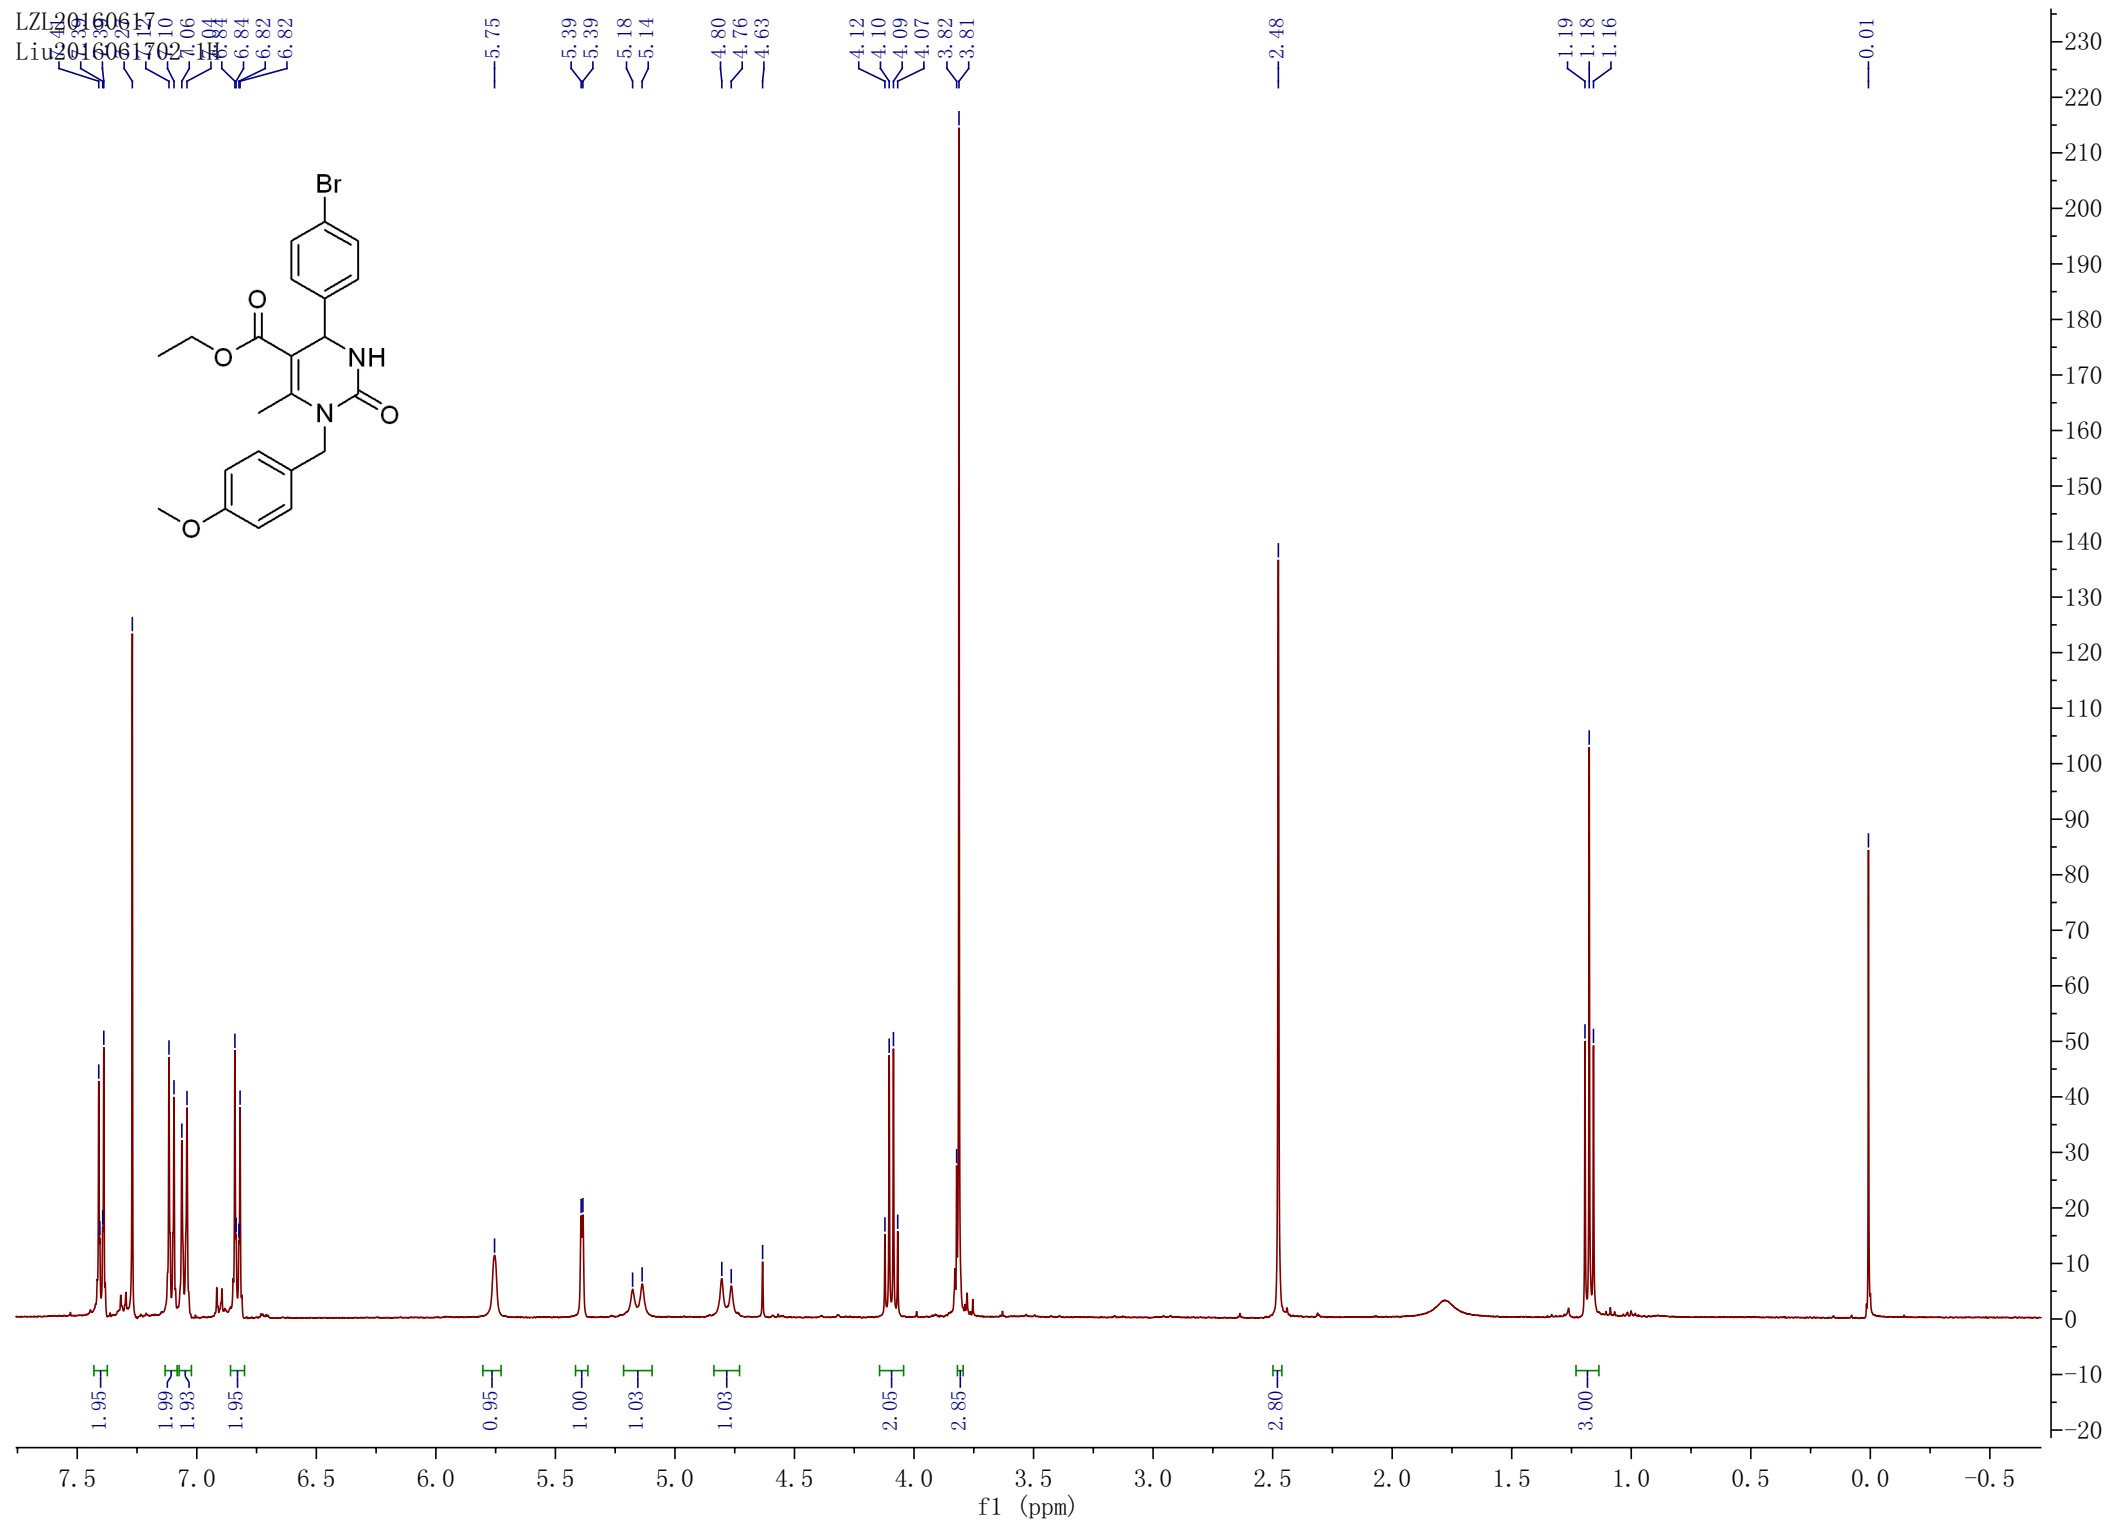

Supplement: s1 [file s1]

氢谱  
LZ-704-1H

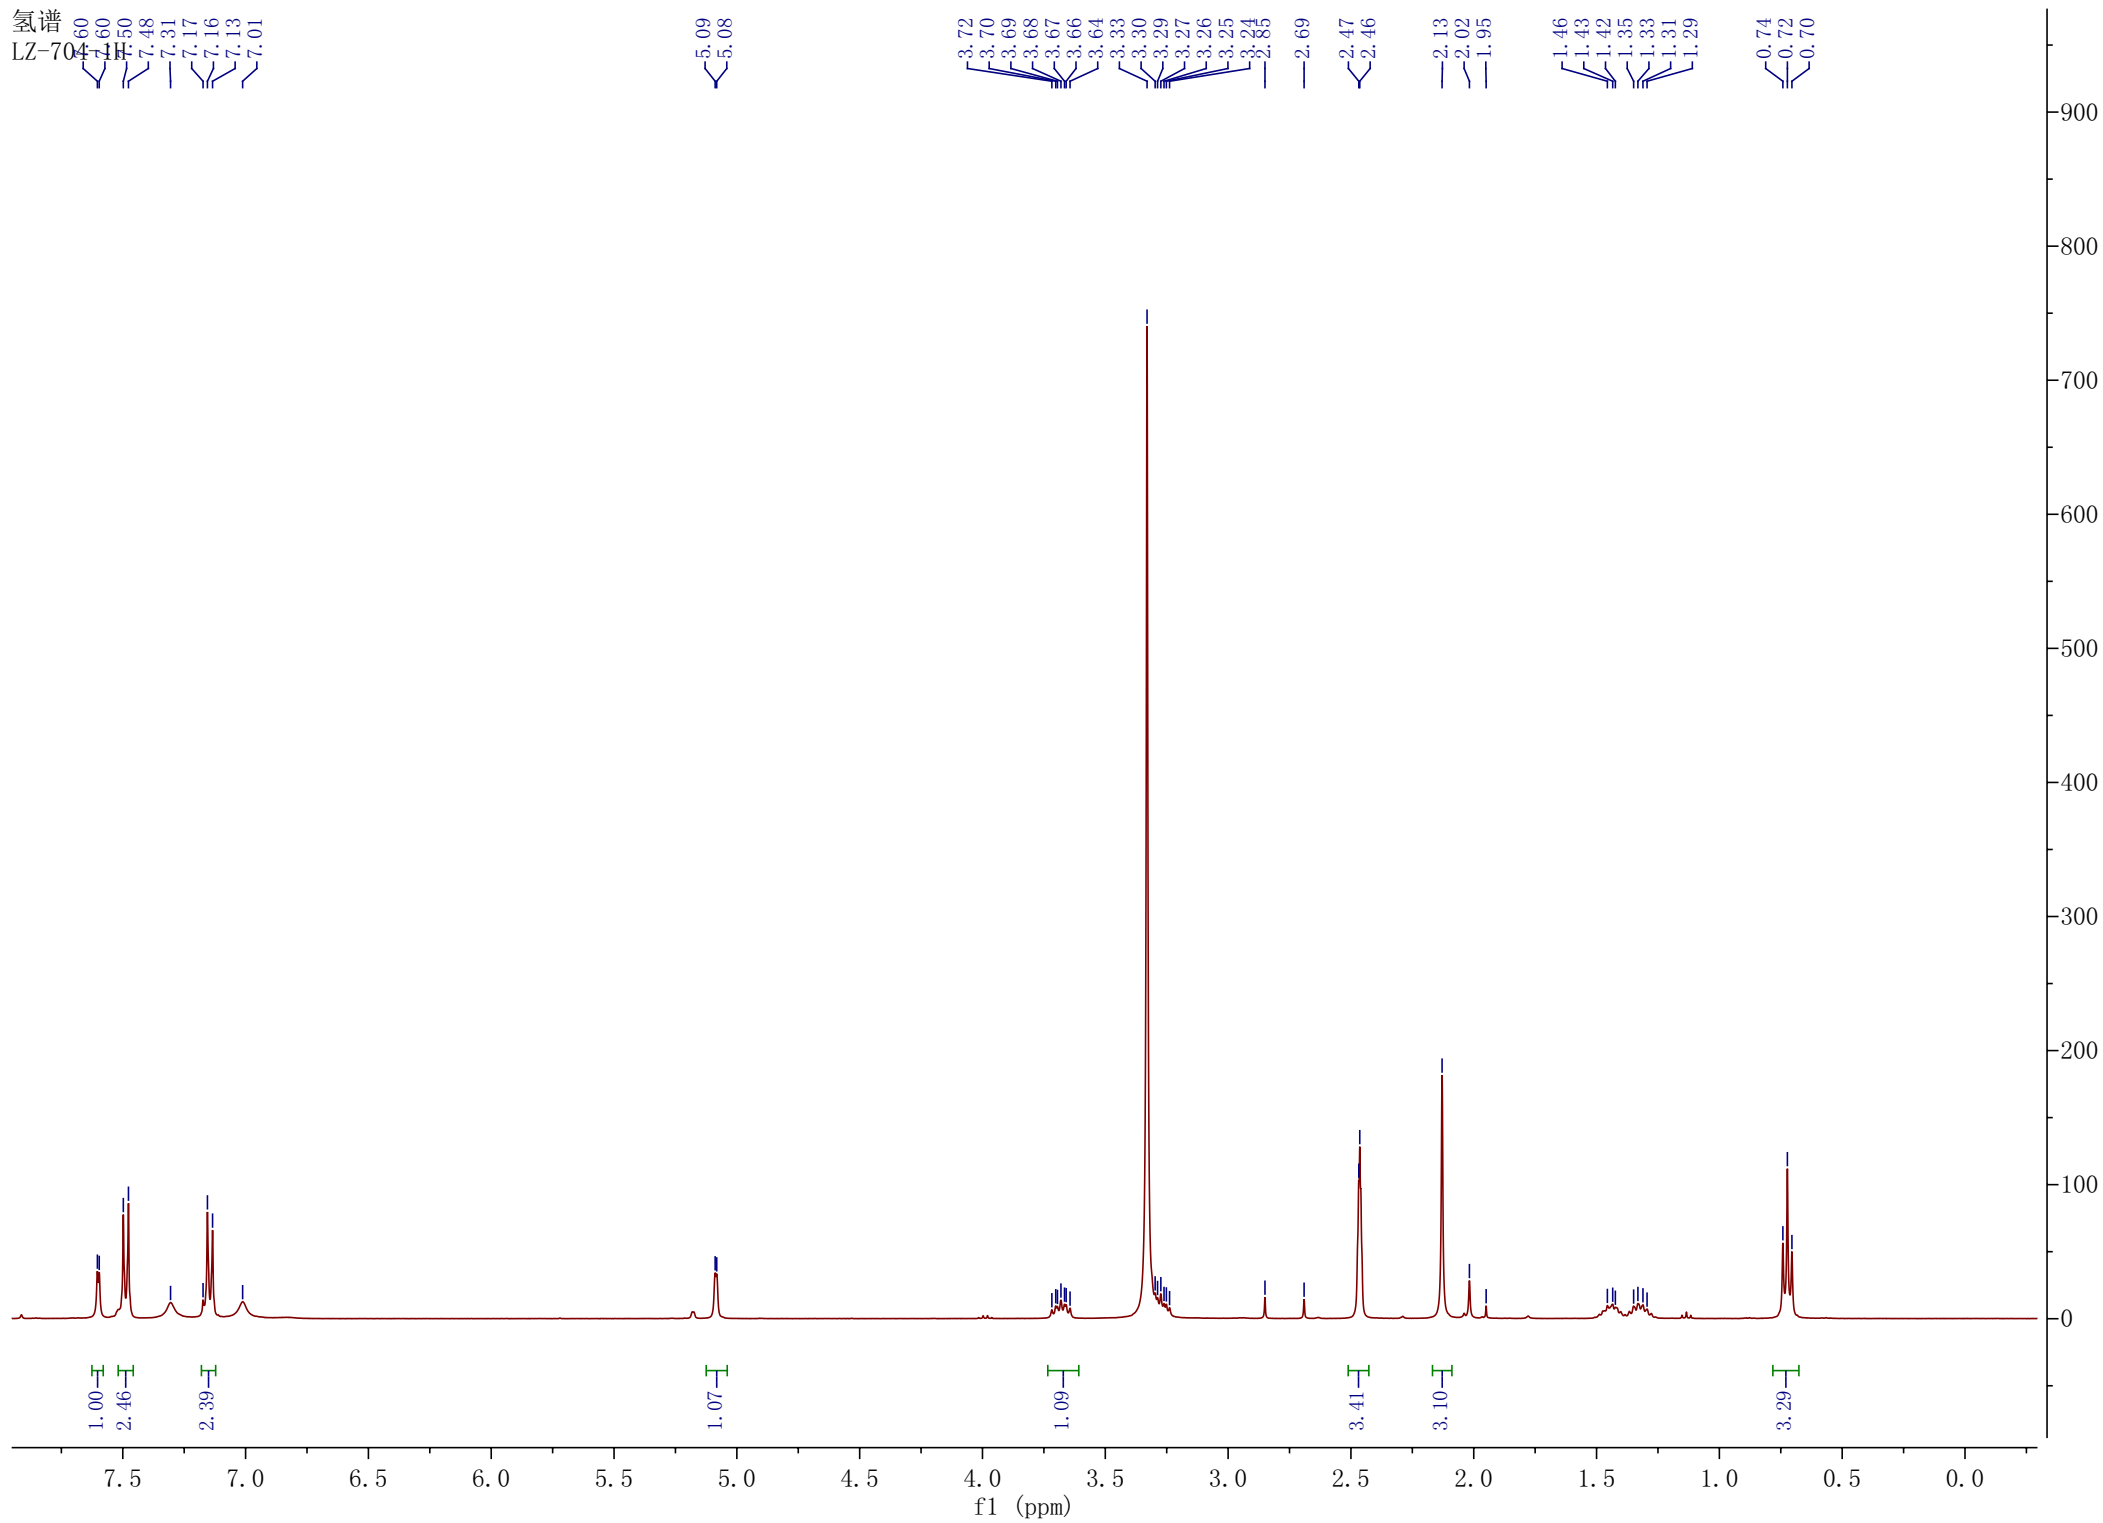

Supplement: s1 [file s1]

LZL20170608  
Liub17060801-1H

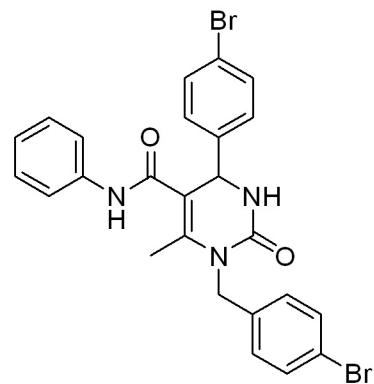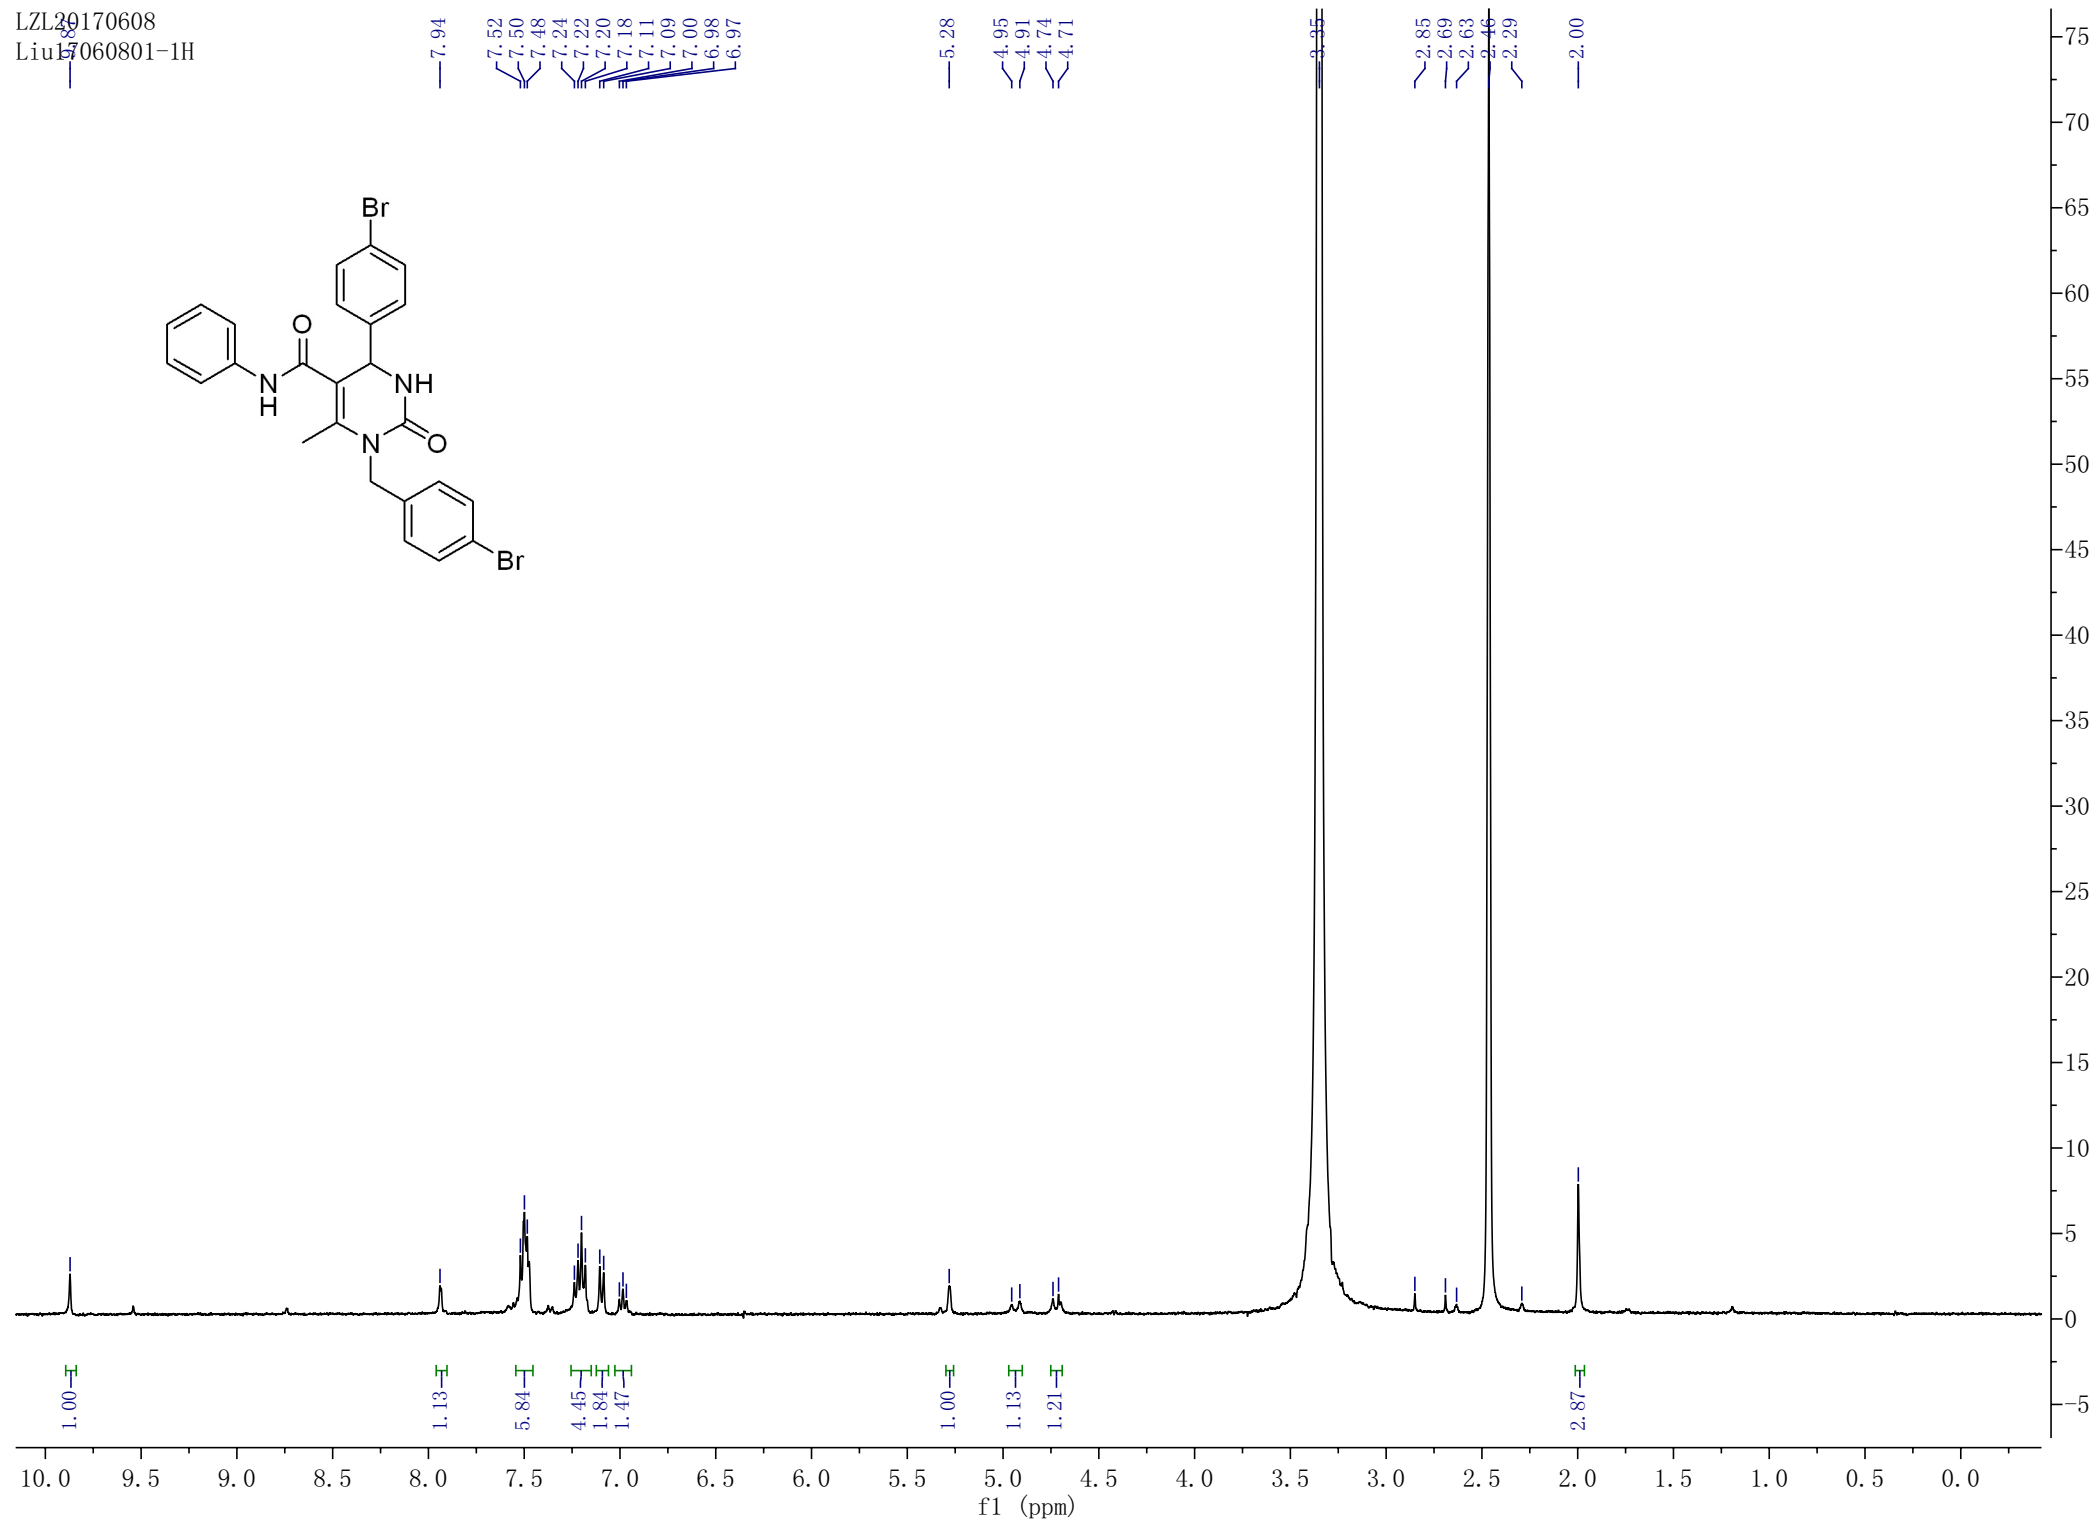

Supplement: s1 [file s1]

LZ-304

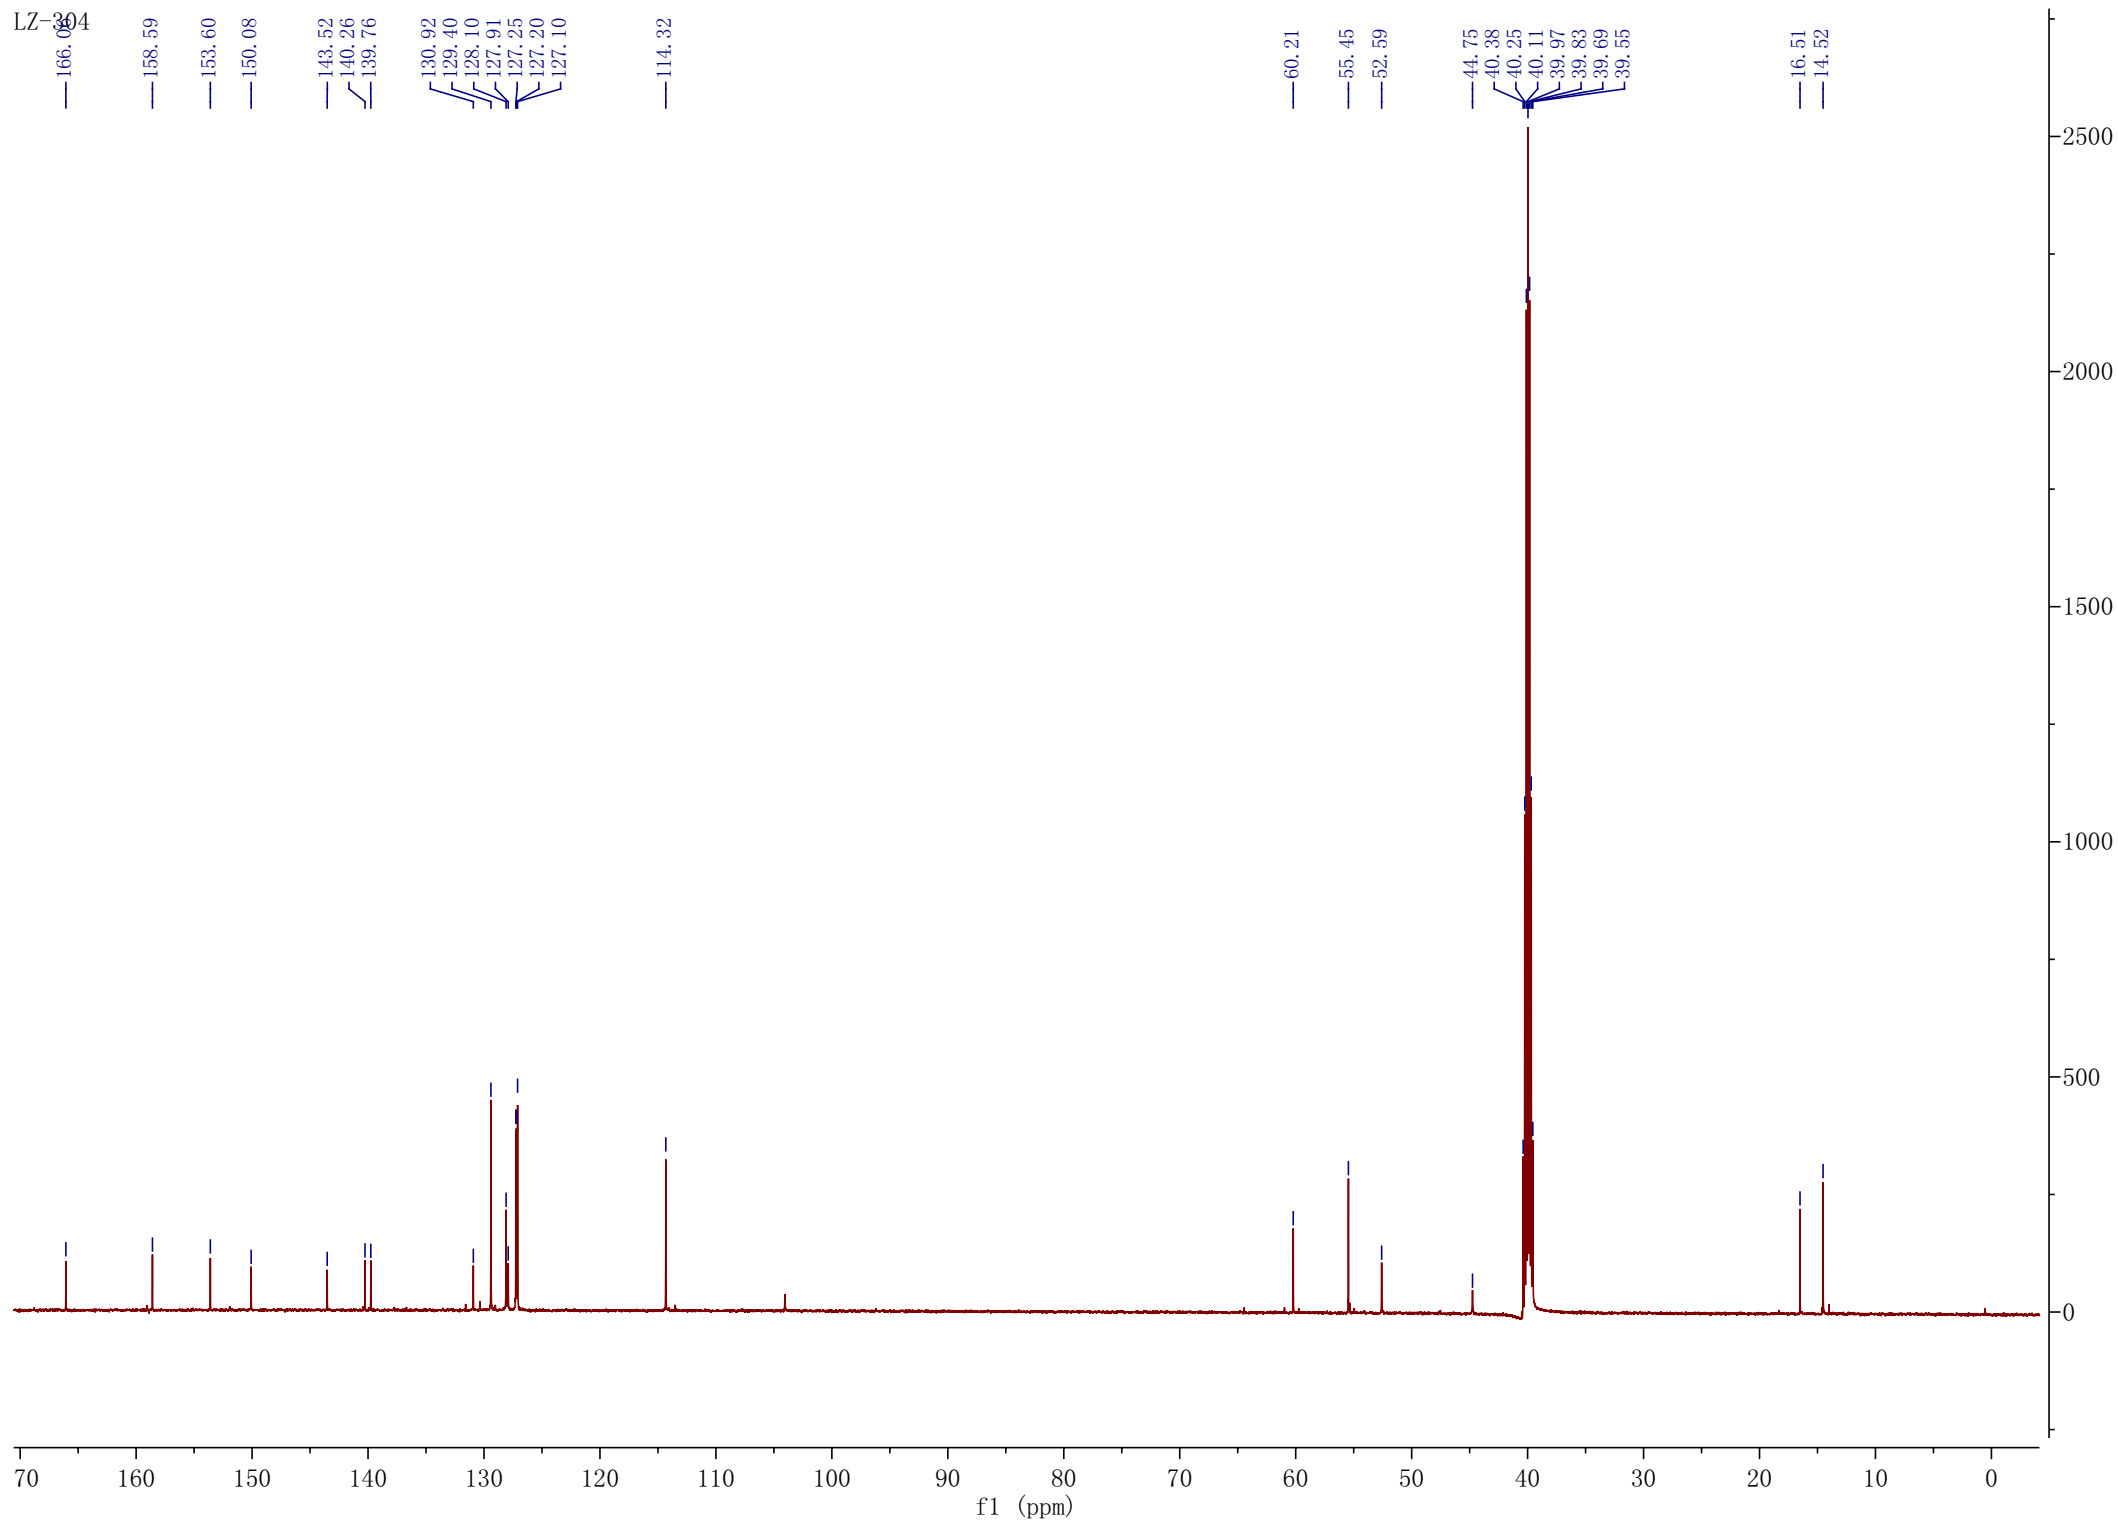

Supplement: s1 [file s1]

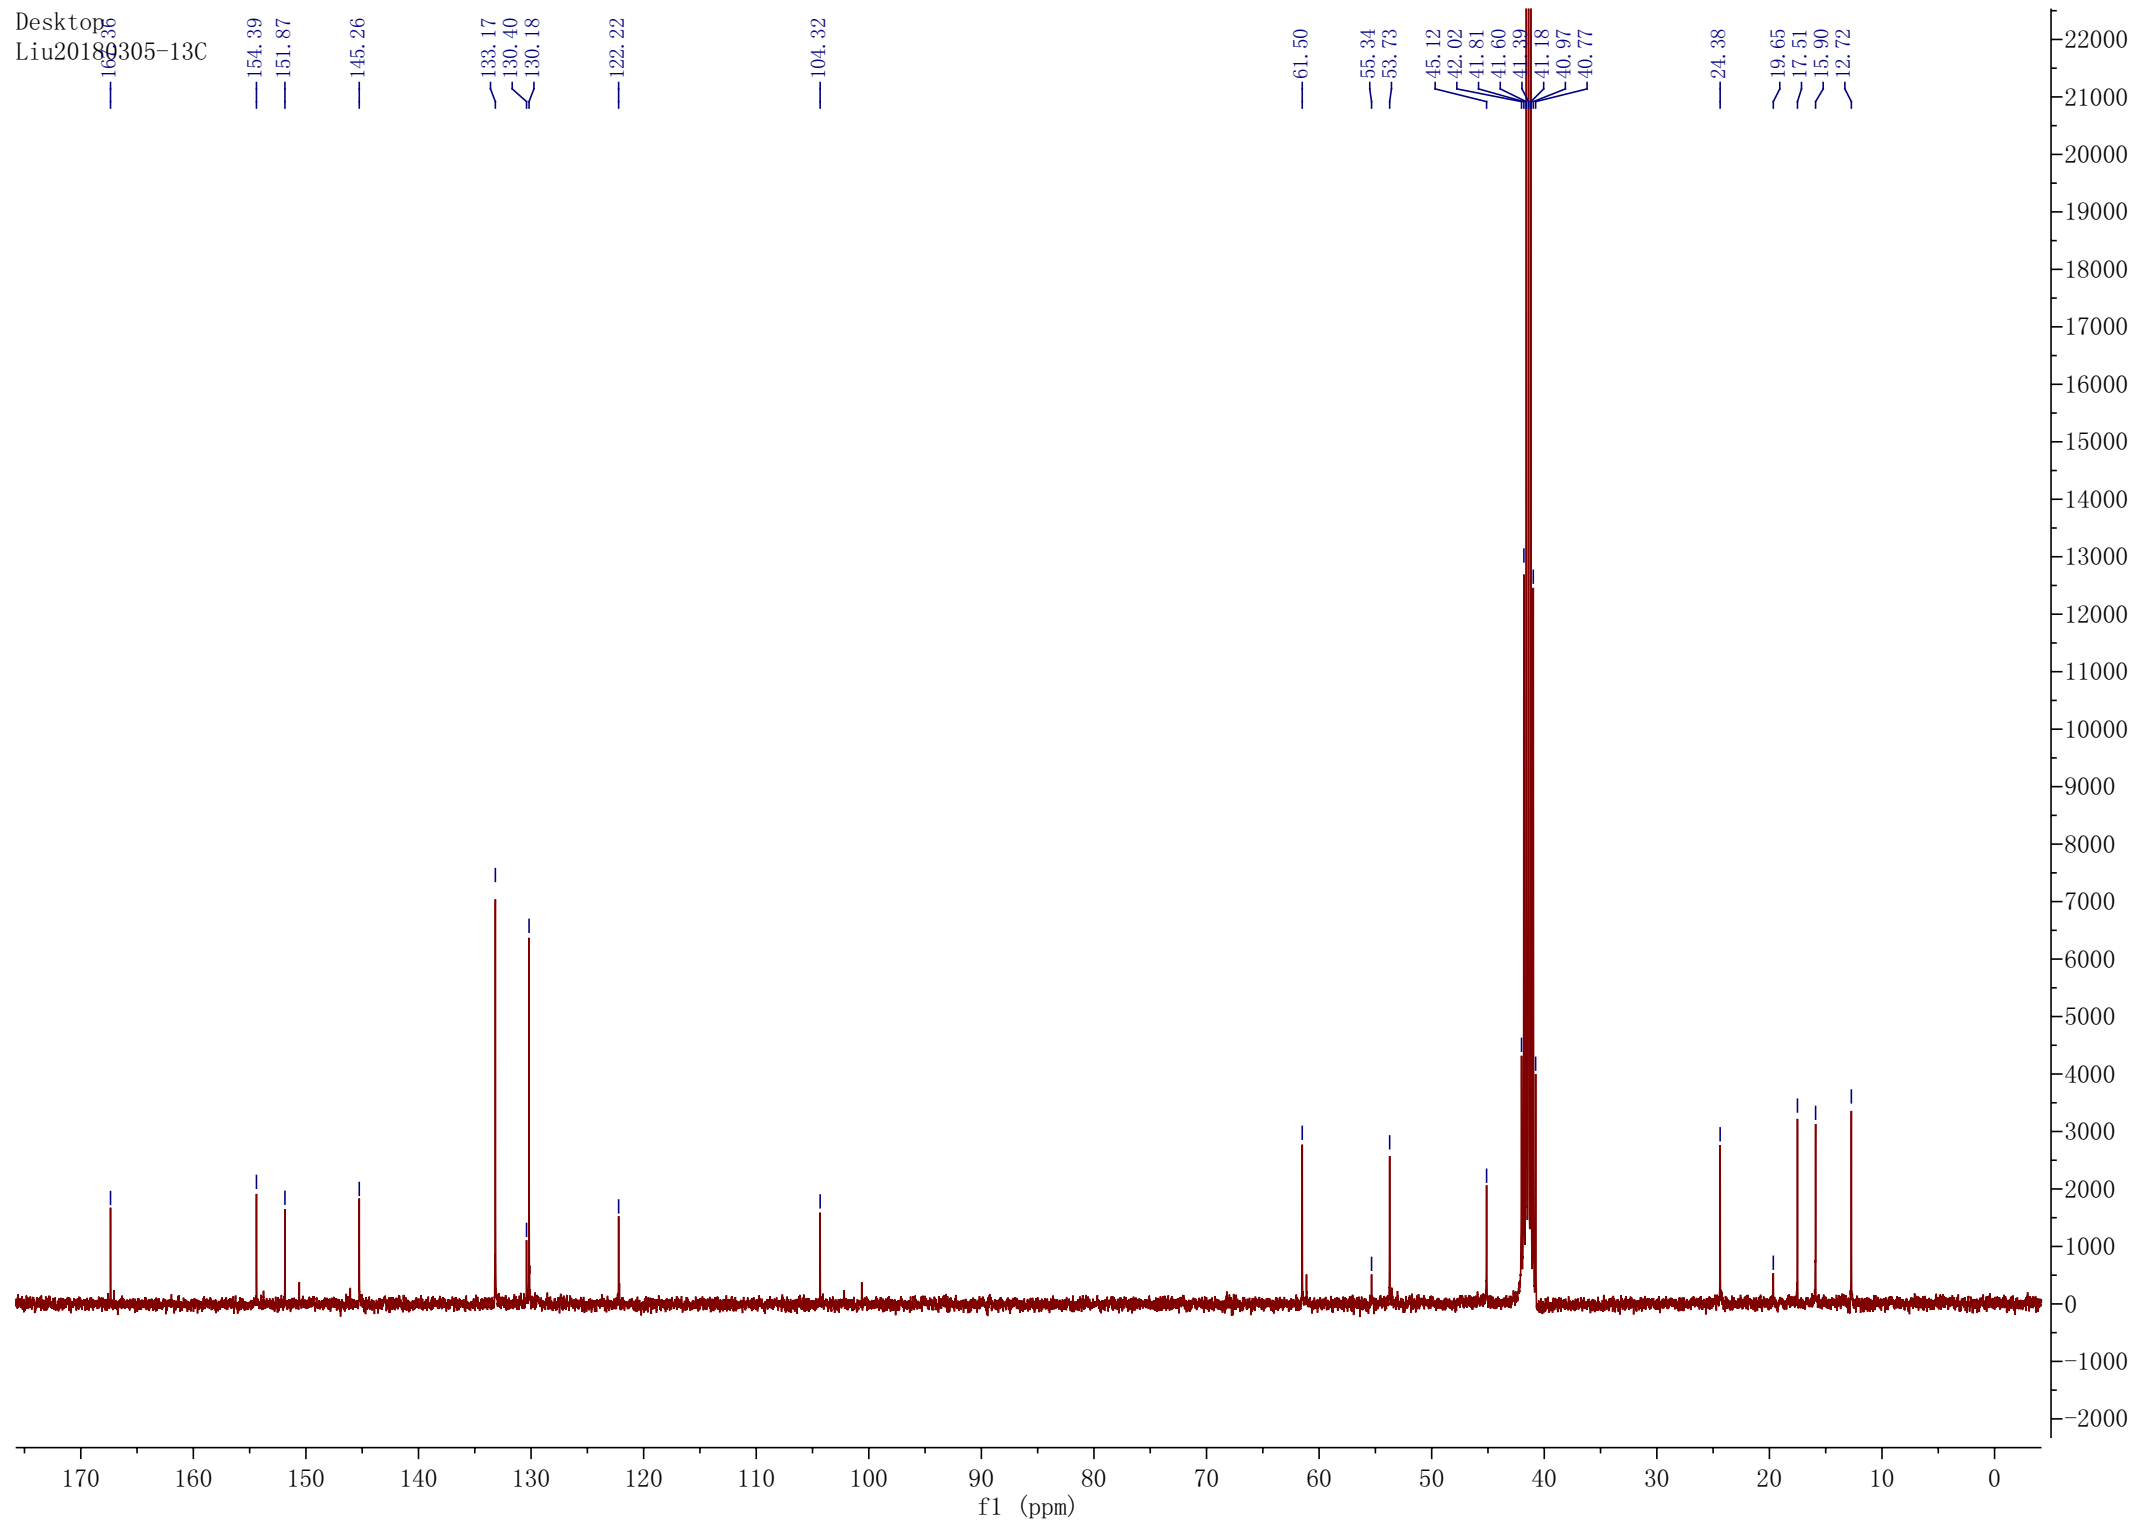

Supplement: s1 [file s1]

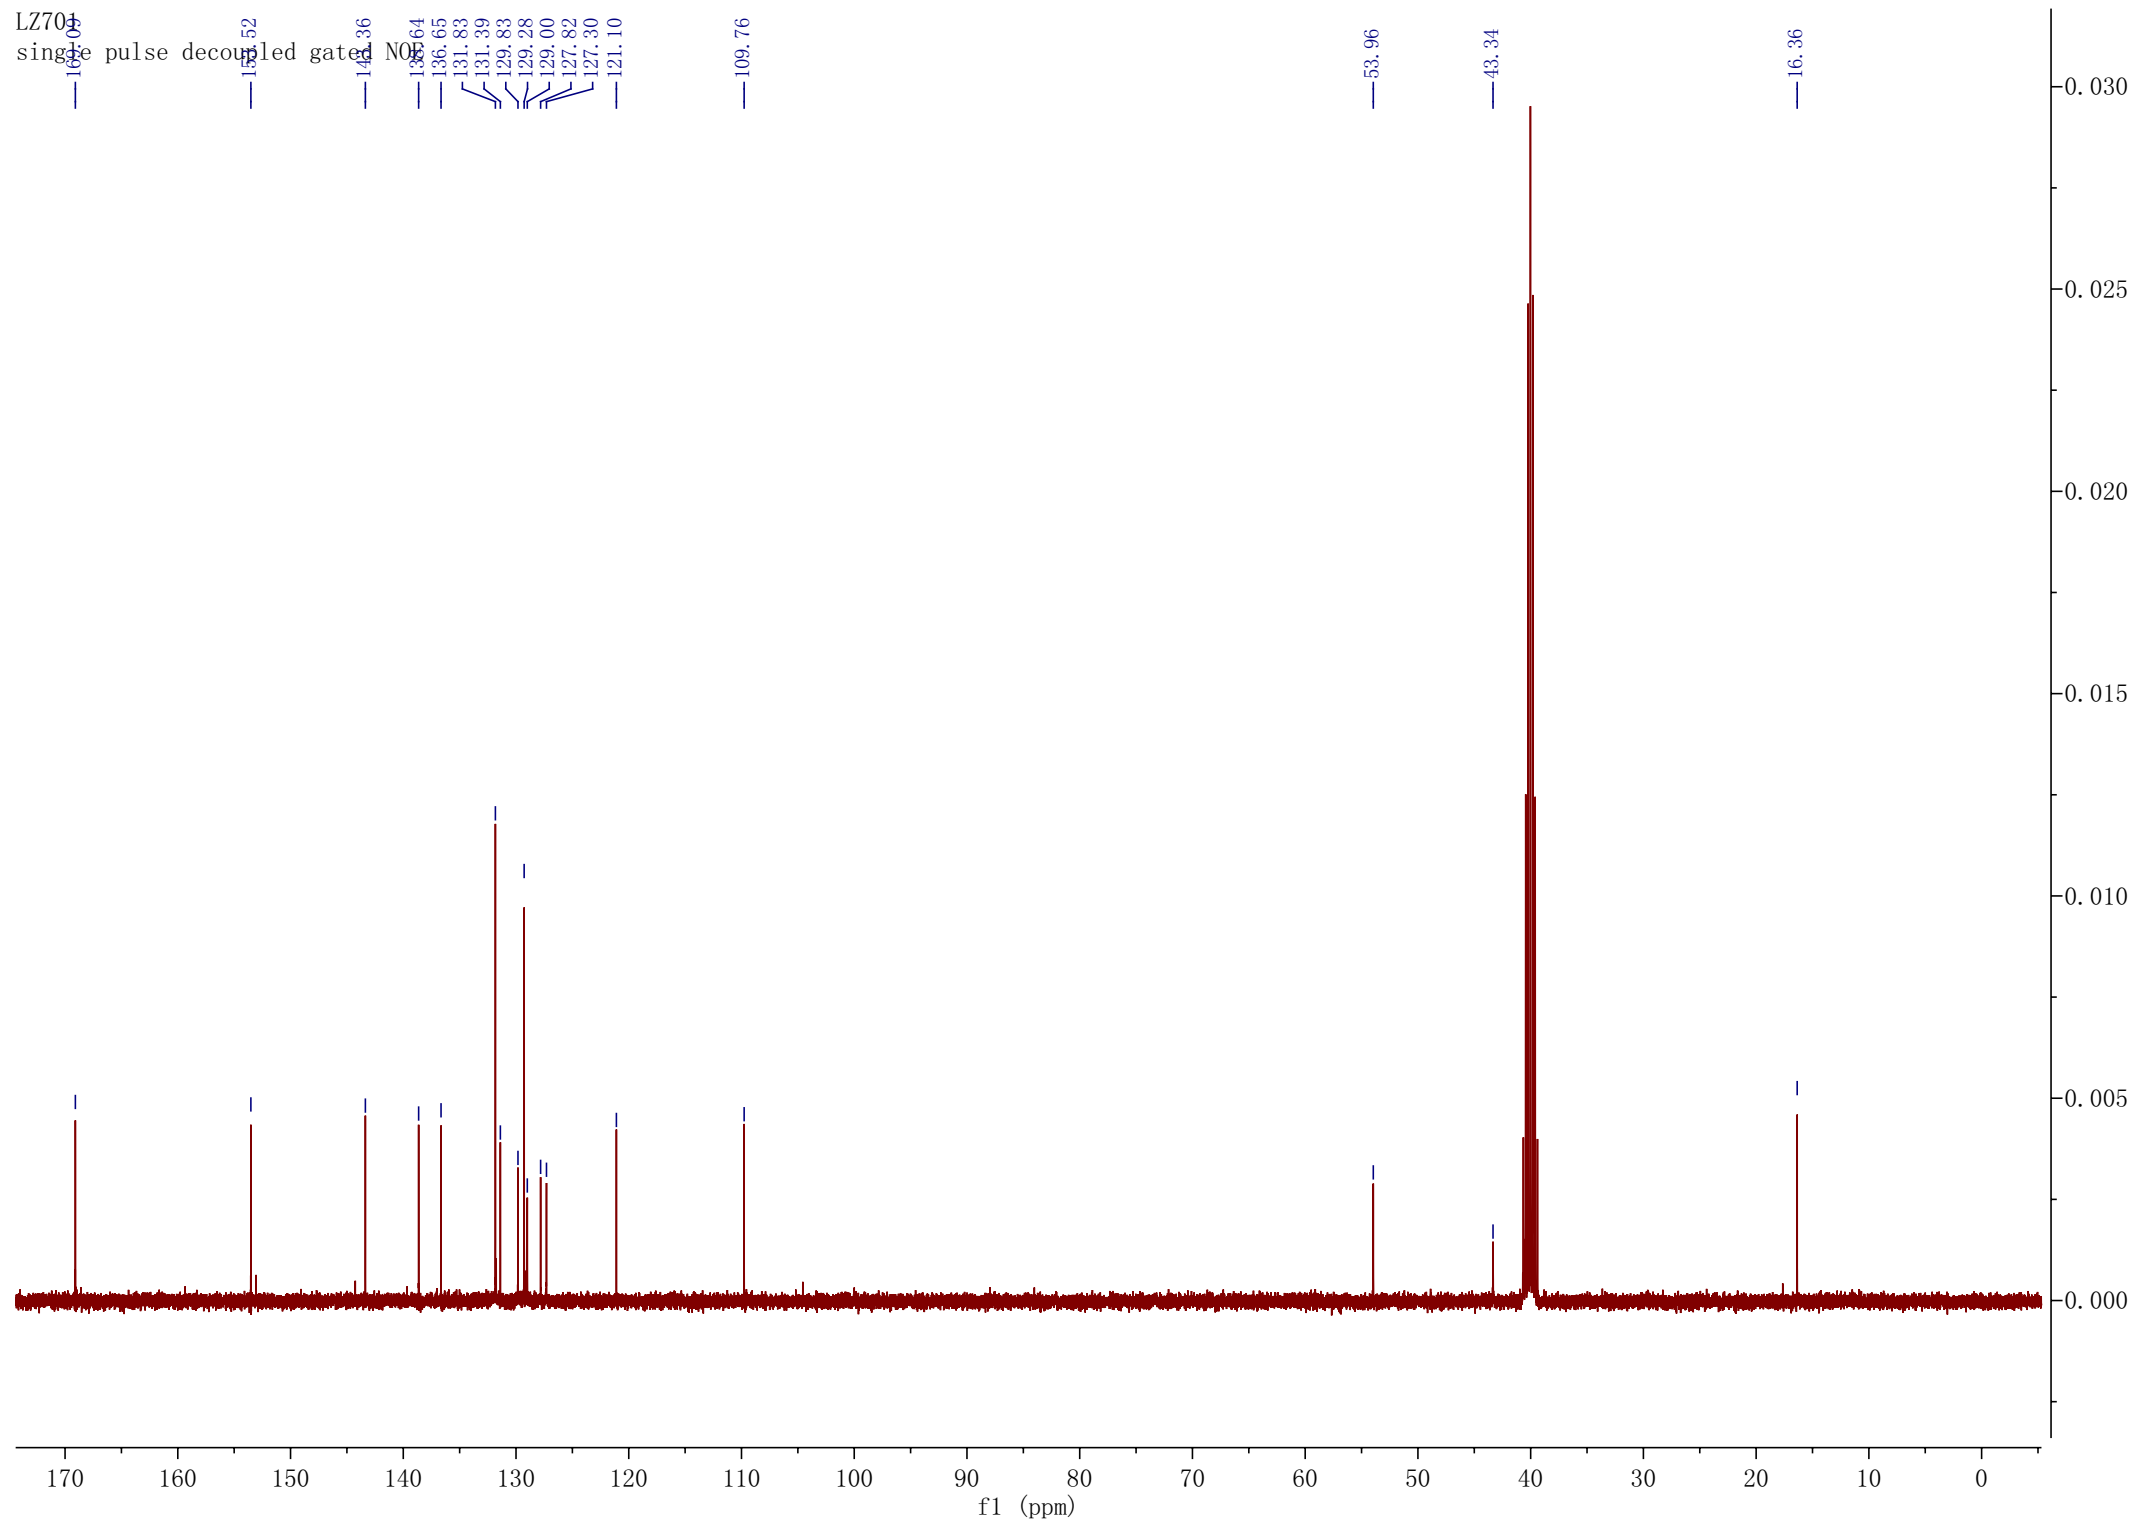

Supplement: s1 [file s1]

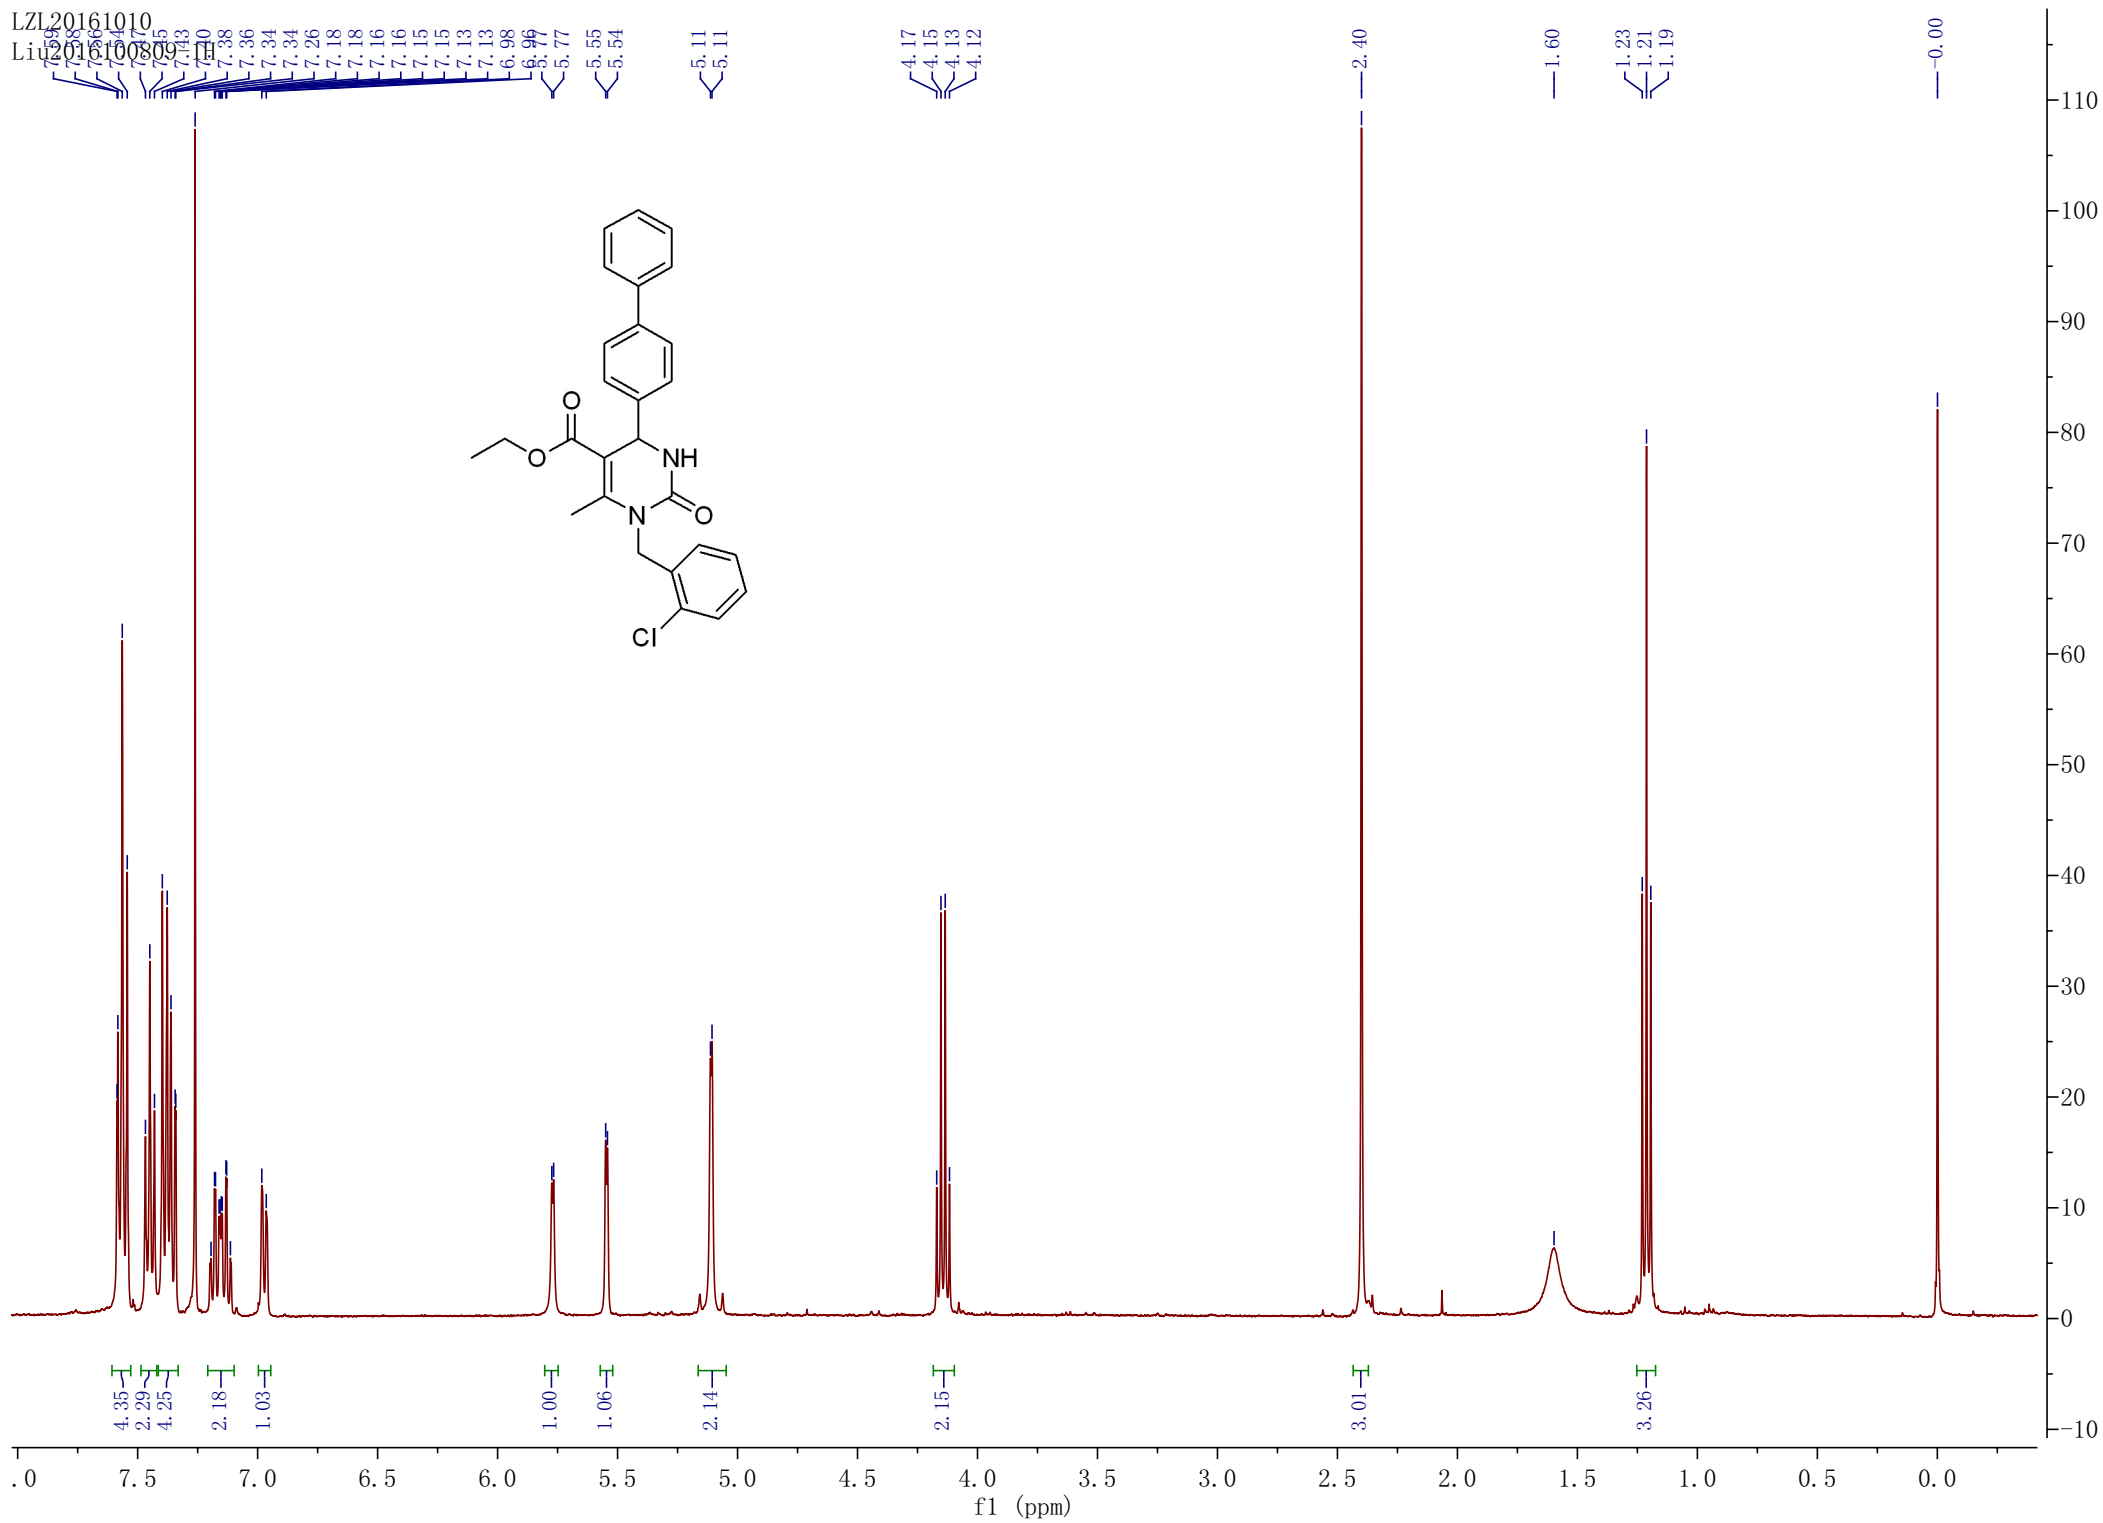

Supplement: s1 [file s1]

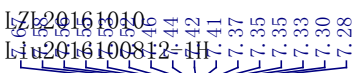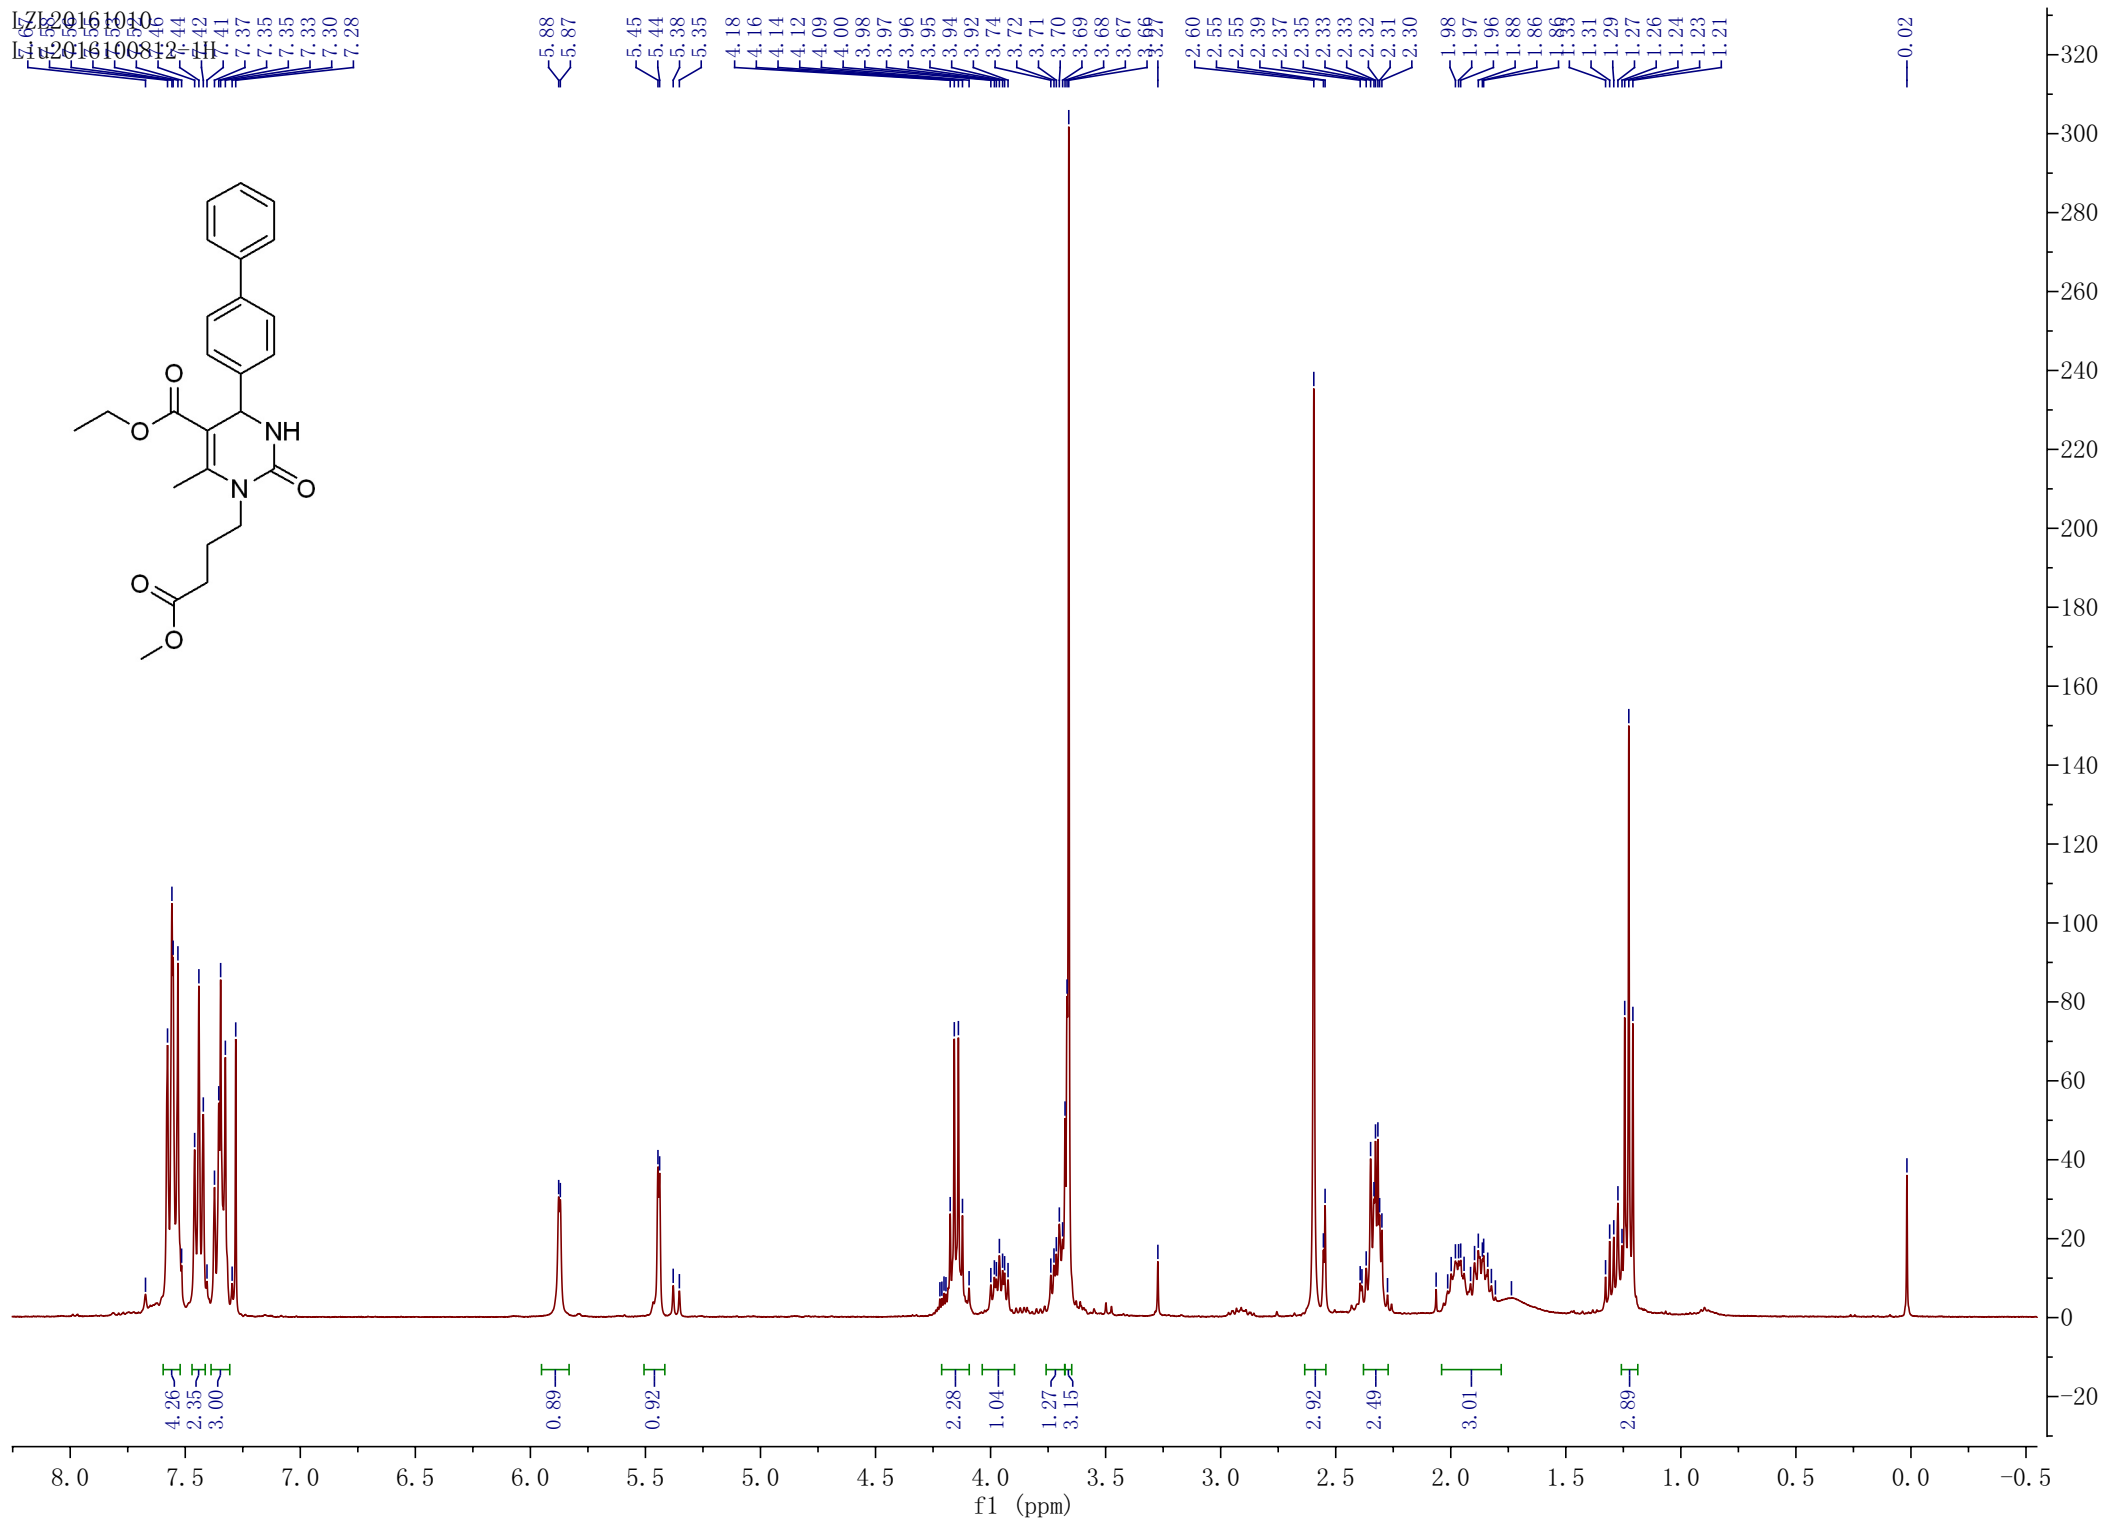

Supplement: s1 [file s1]

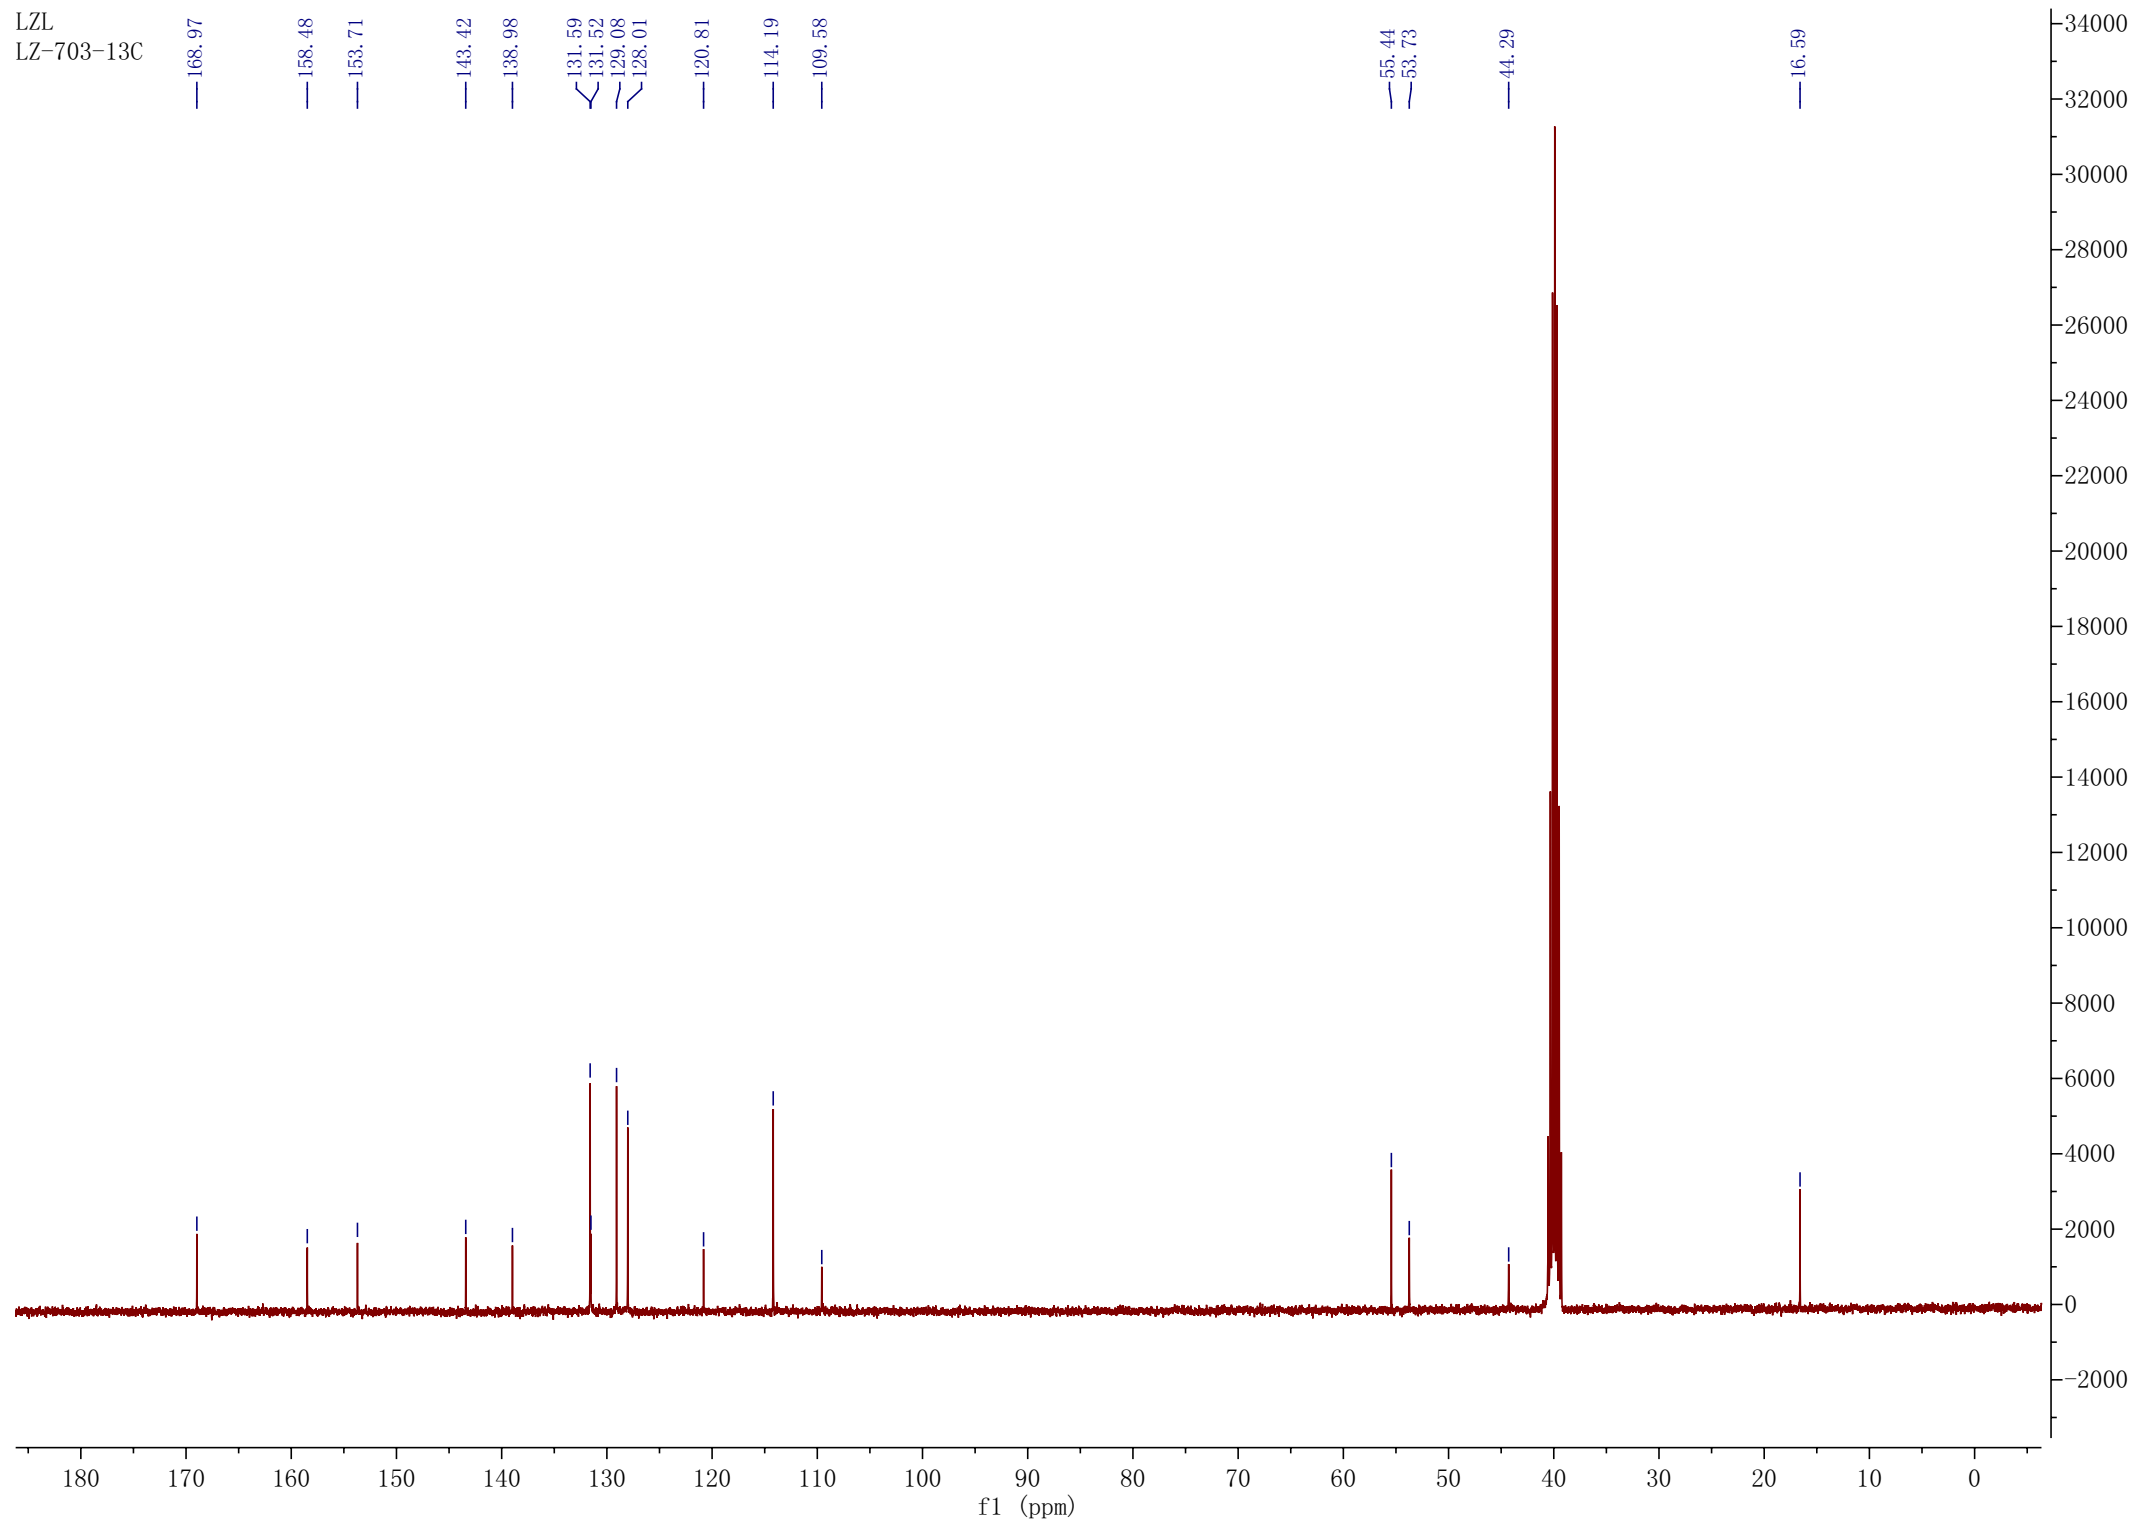

Supplement: s1 [file s1]

LZL20170515  
Liu2017051504-1H

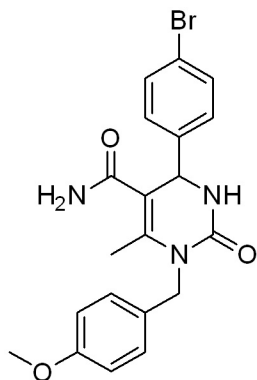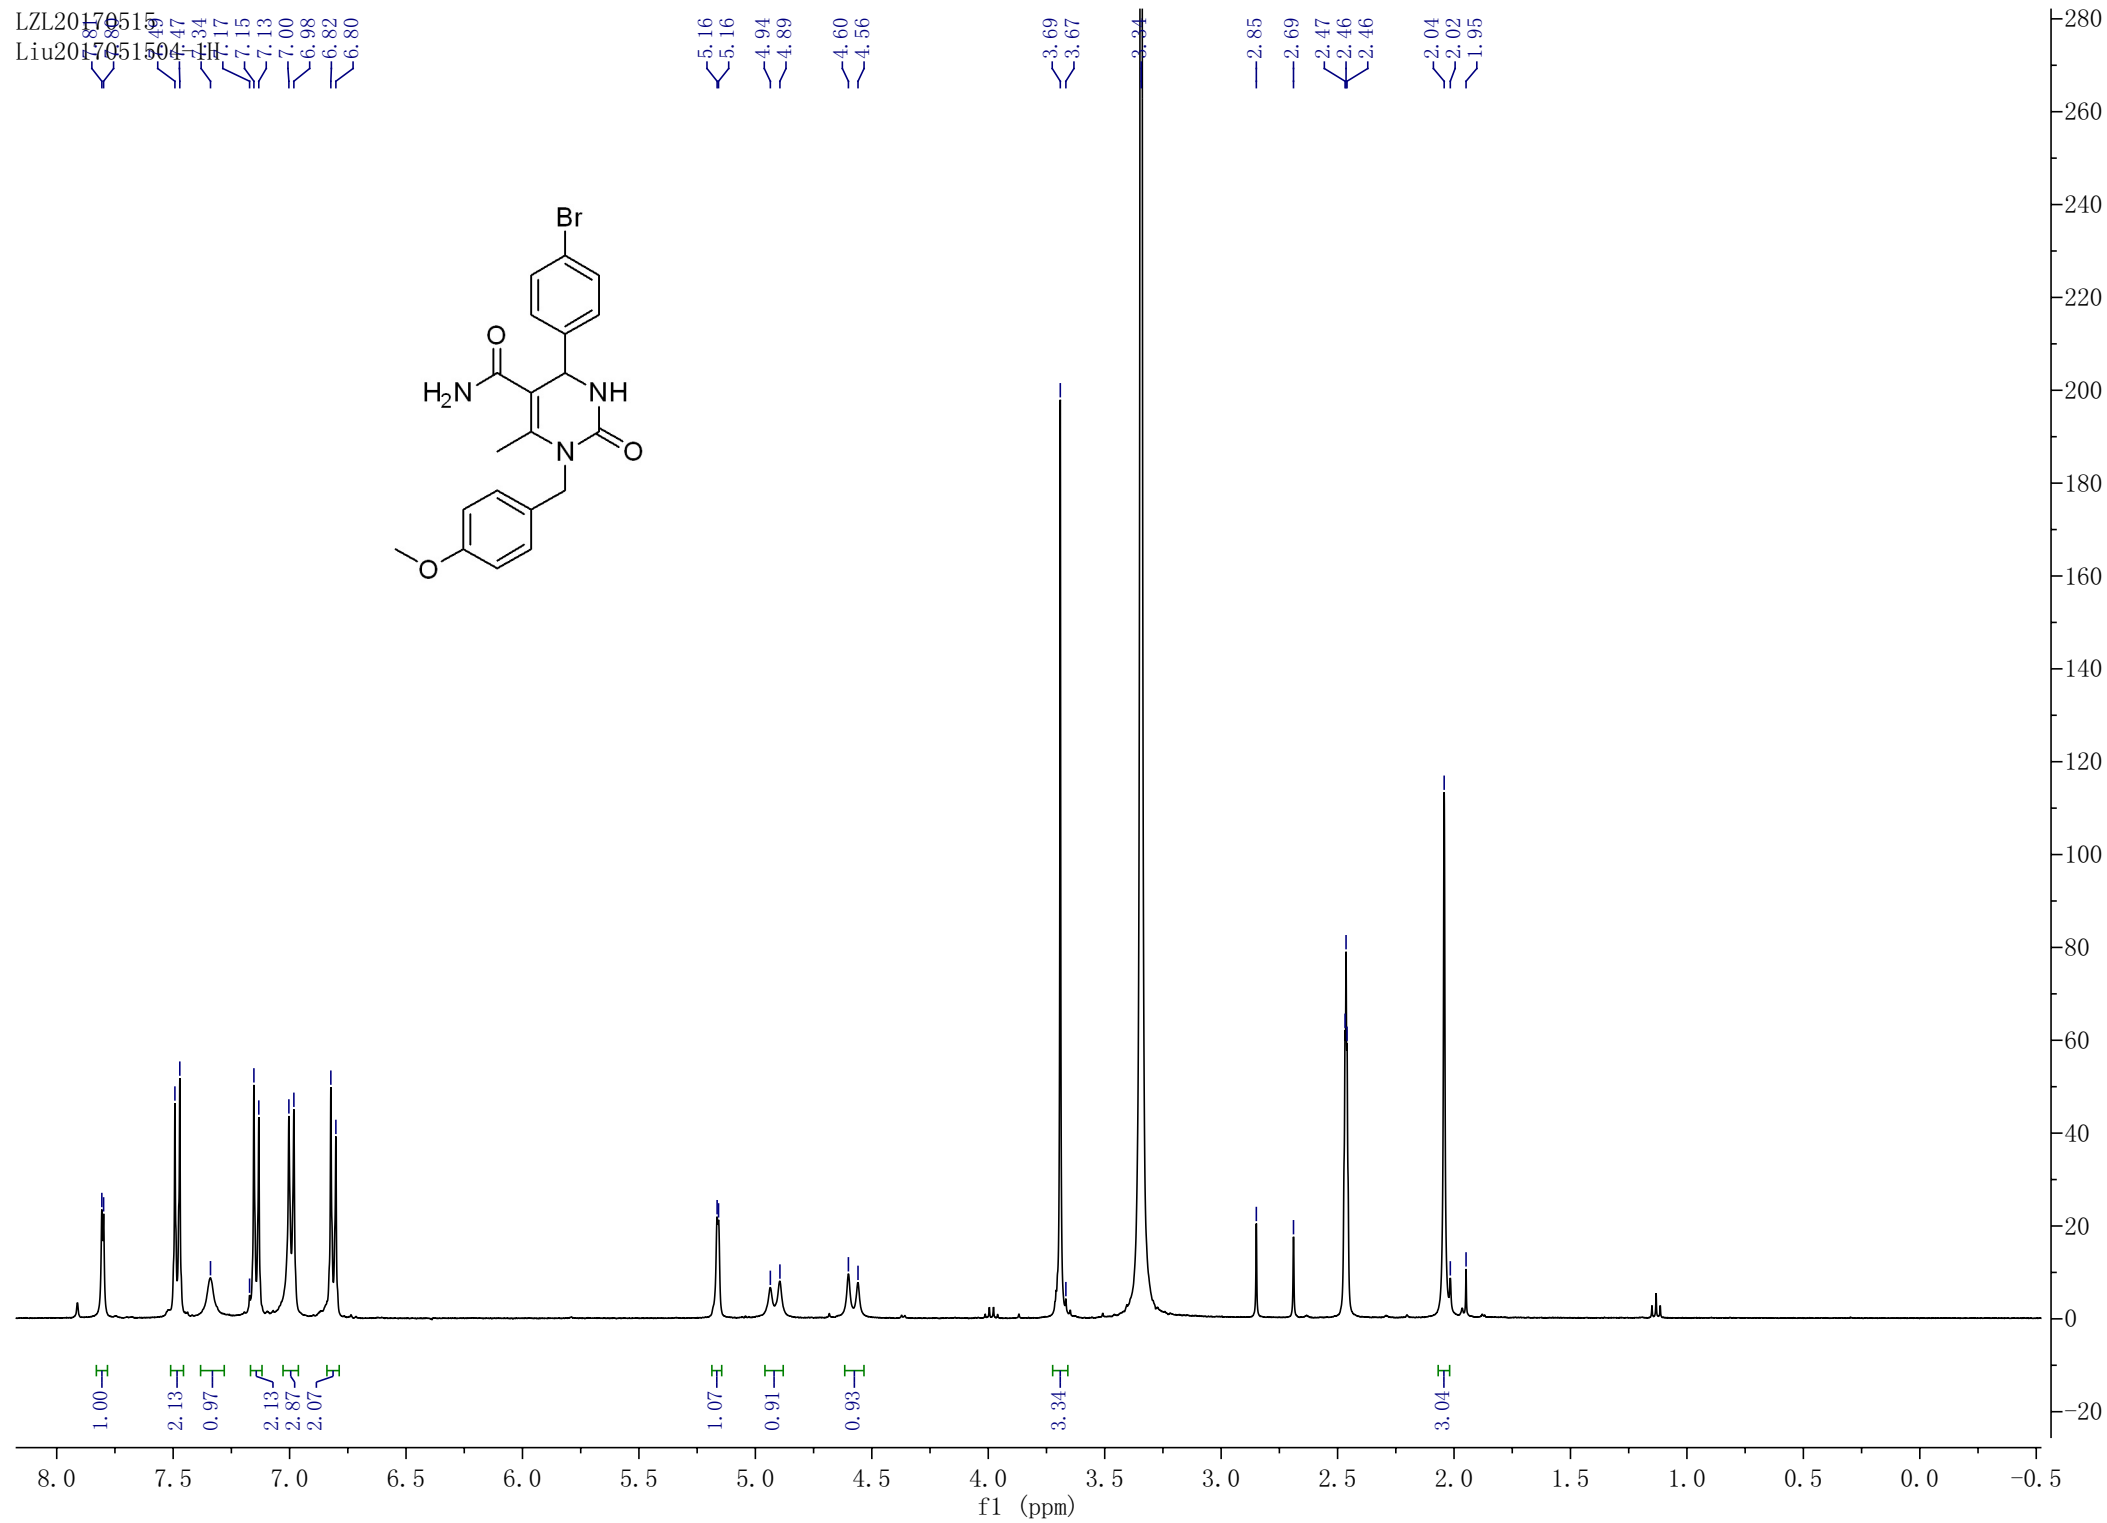

Supplement: s1 [file s1]

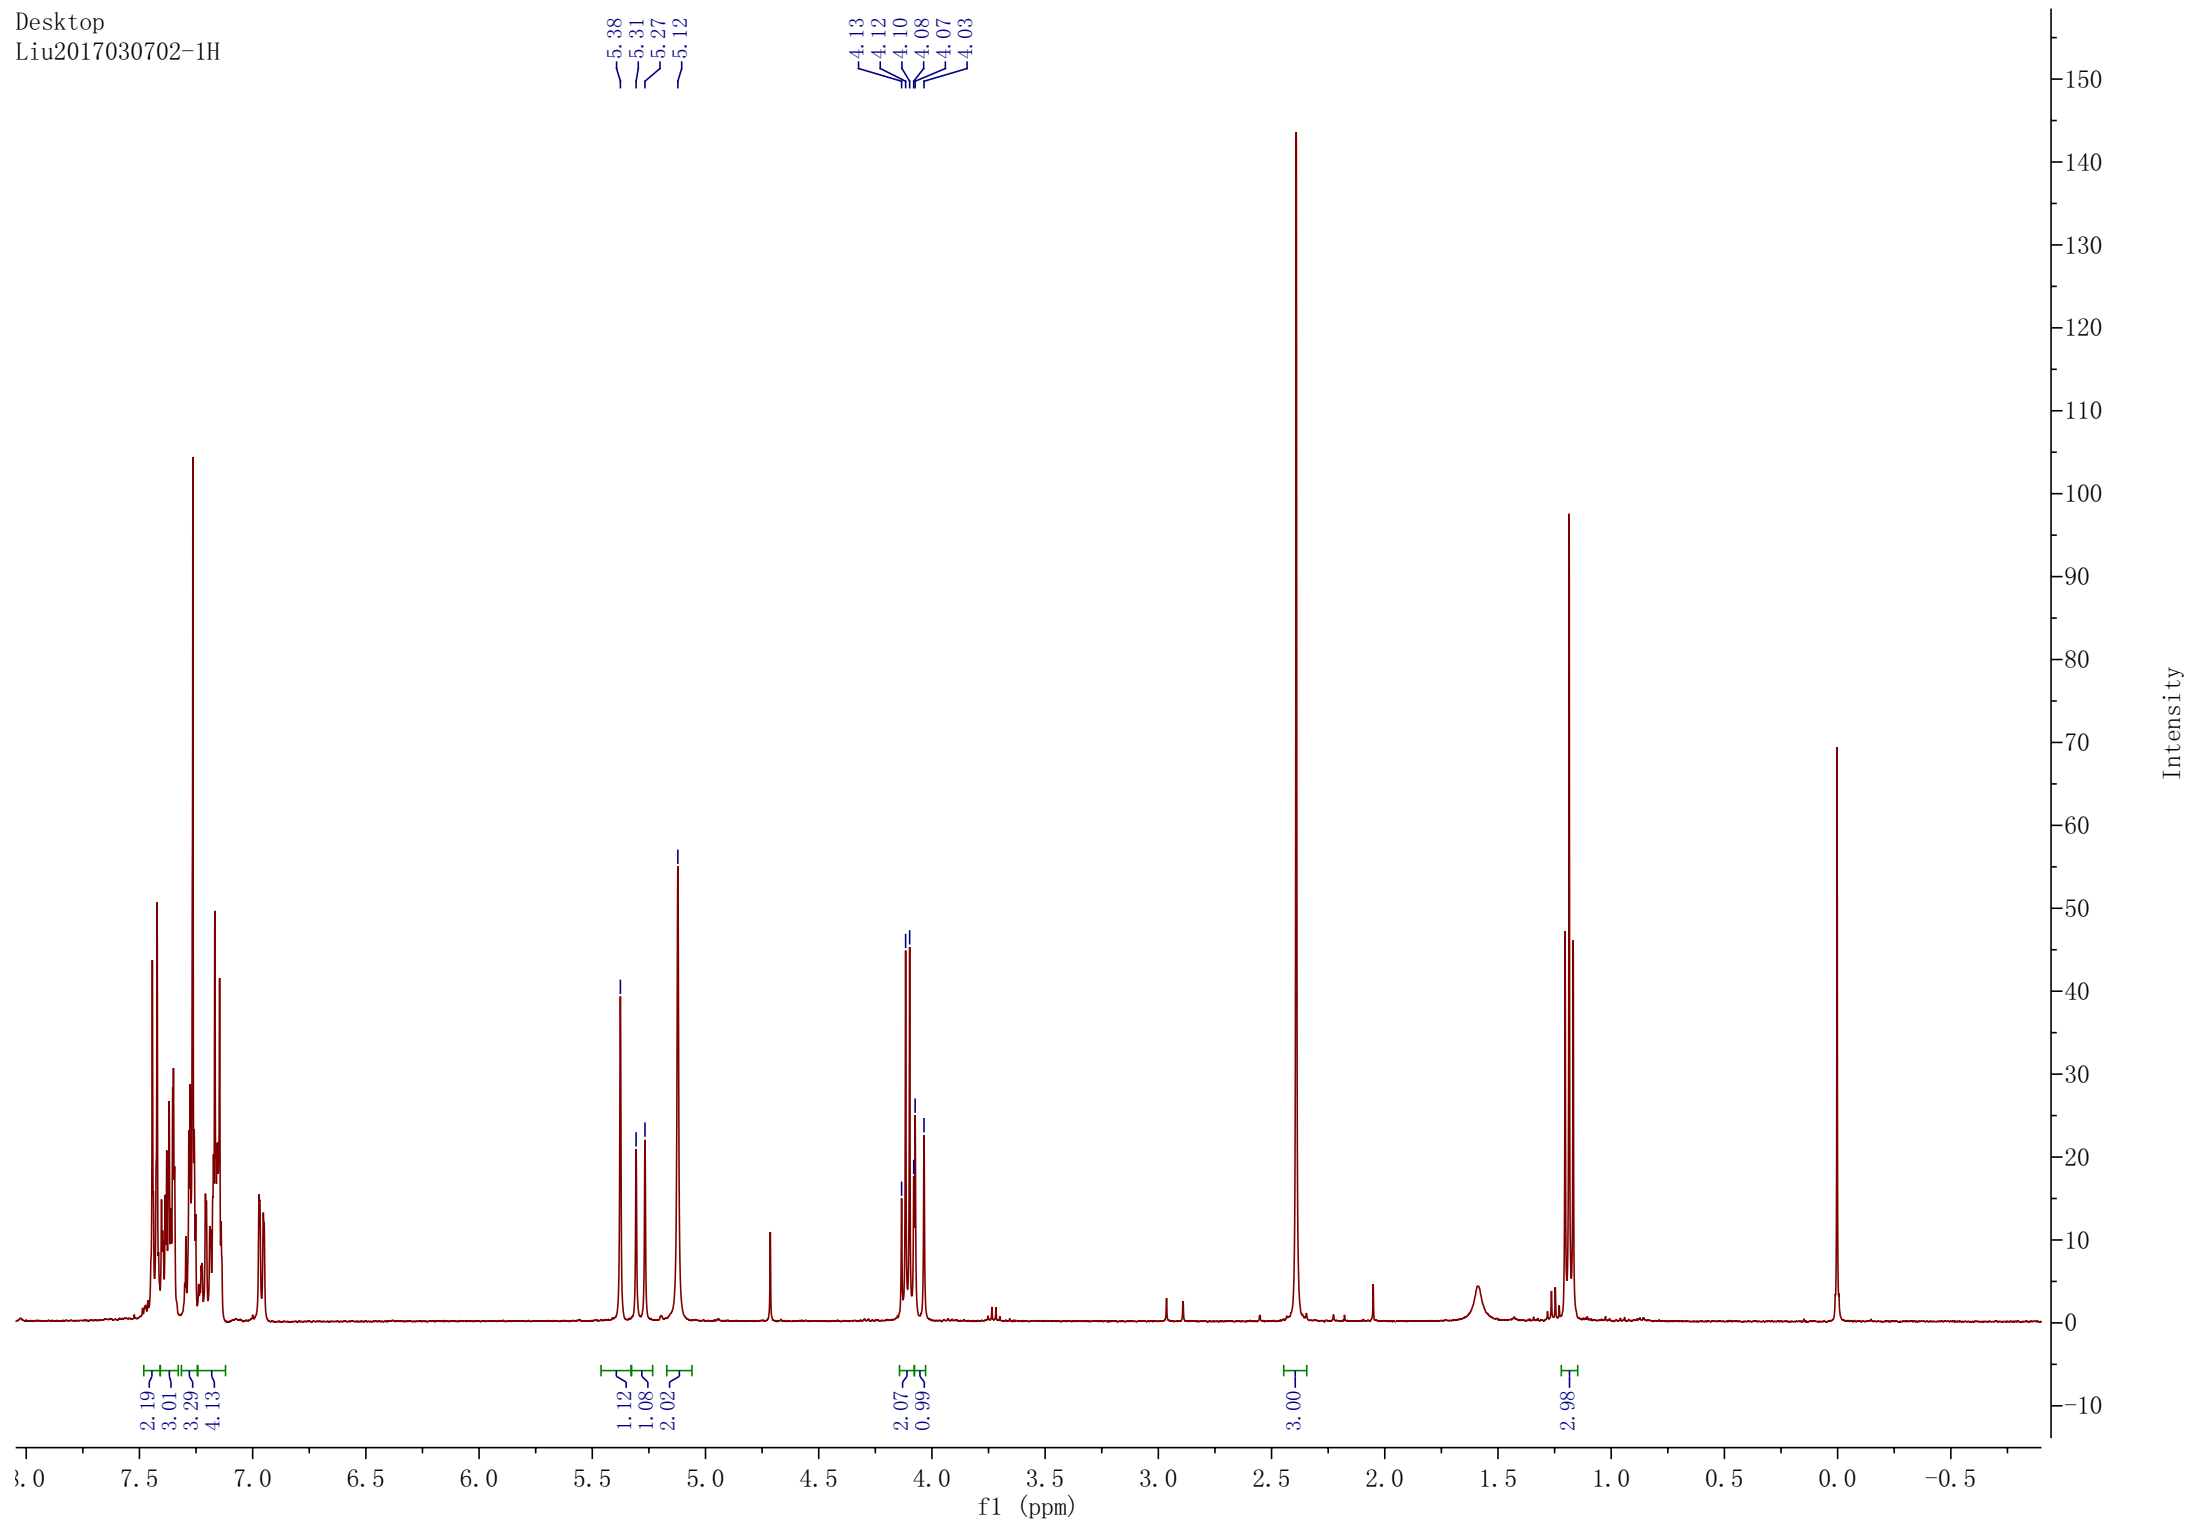

Supplement: s1 [file s1]

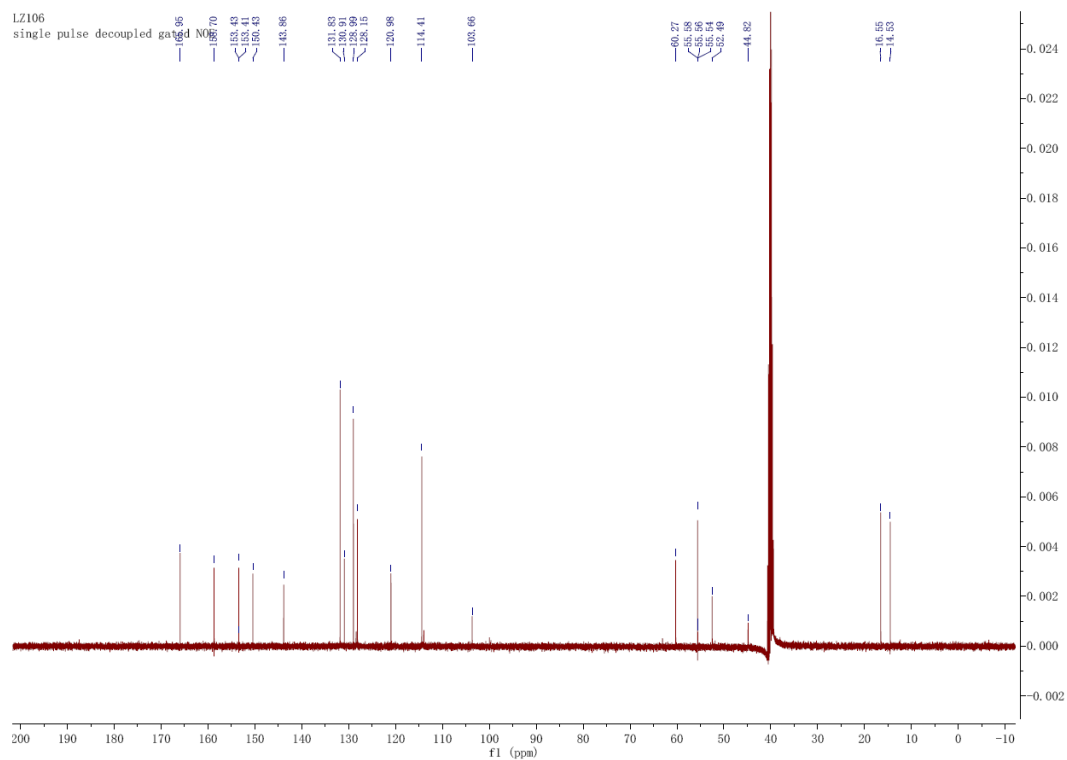

Supplement: s1 [file s1]

LZL20160315  
Liu216031509-1H

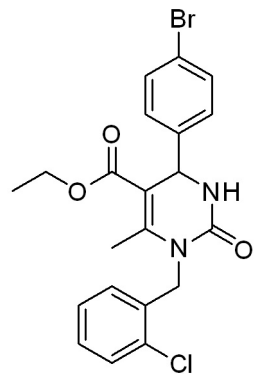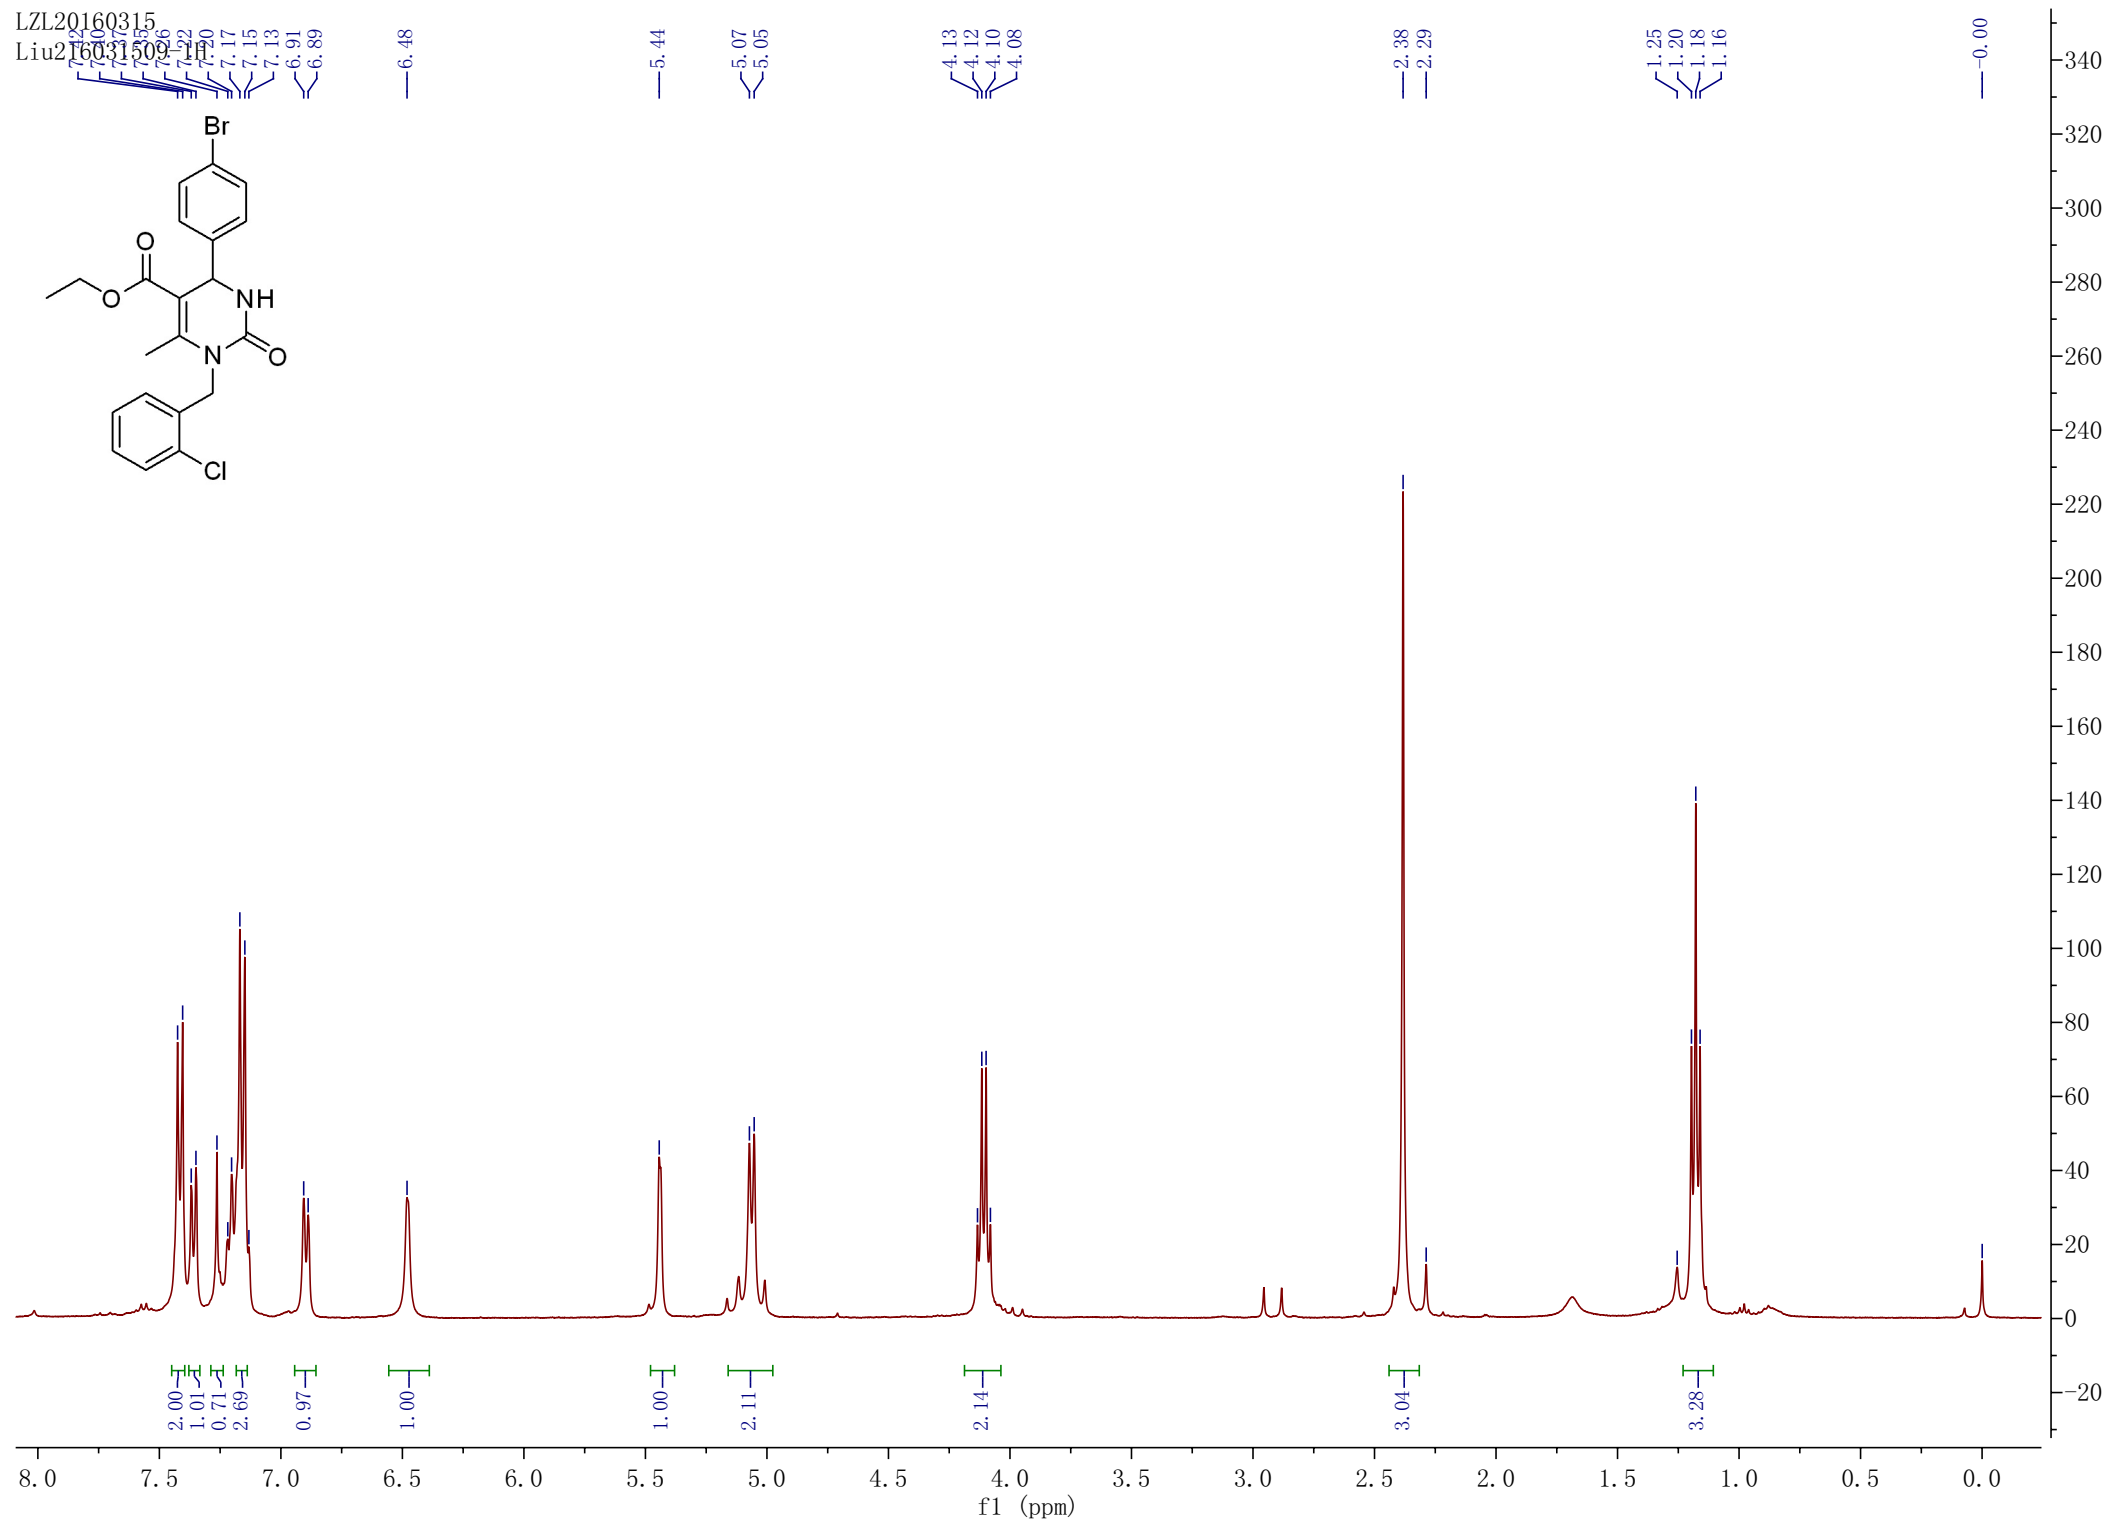

Supplement: s1 [file s1]

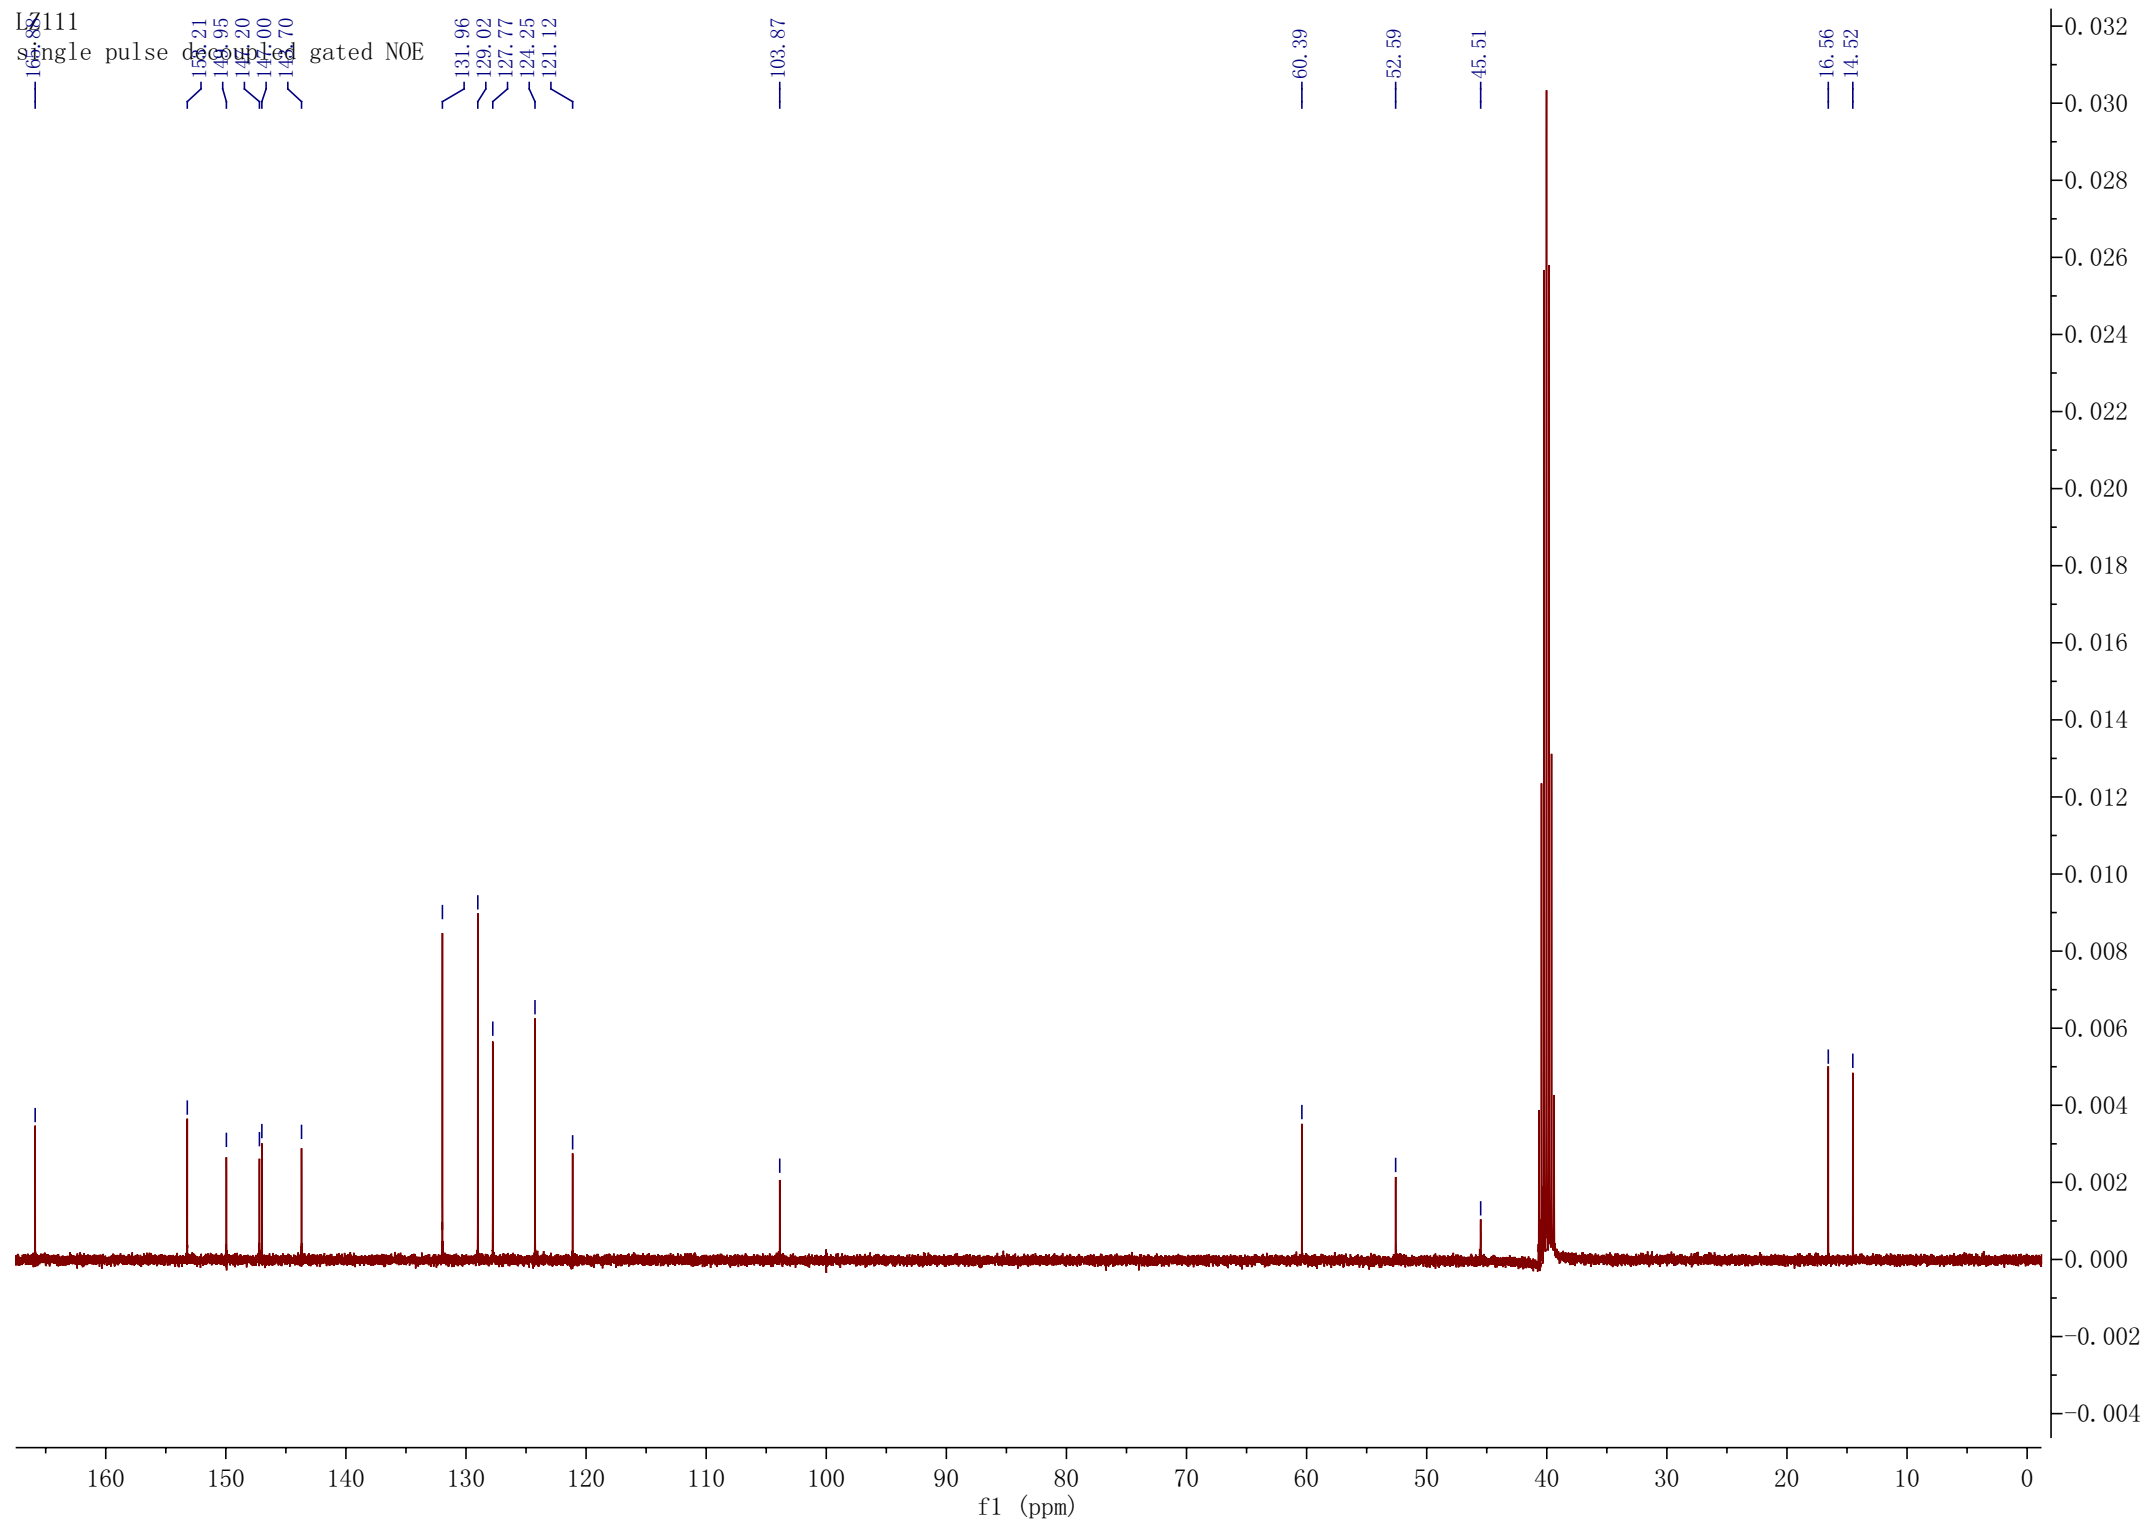

Supplement: s1 [file s1]

LZL20160323  
Liu2016032302-H

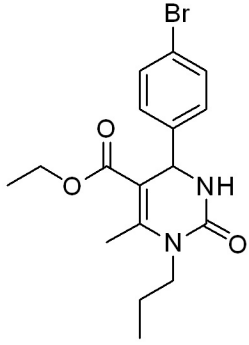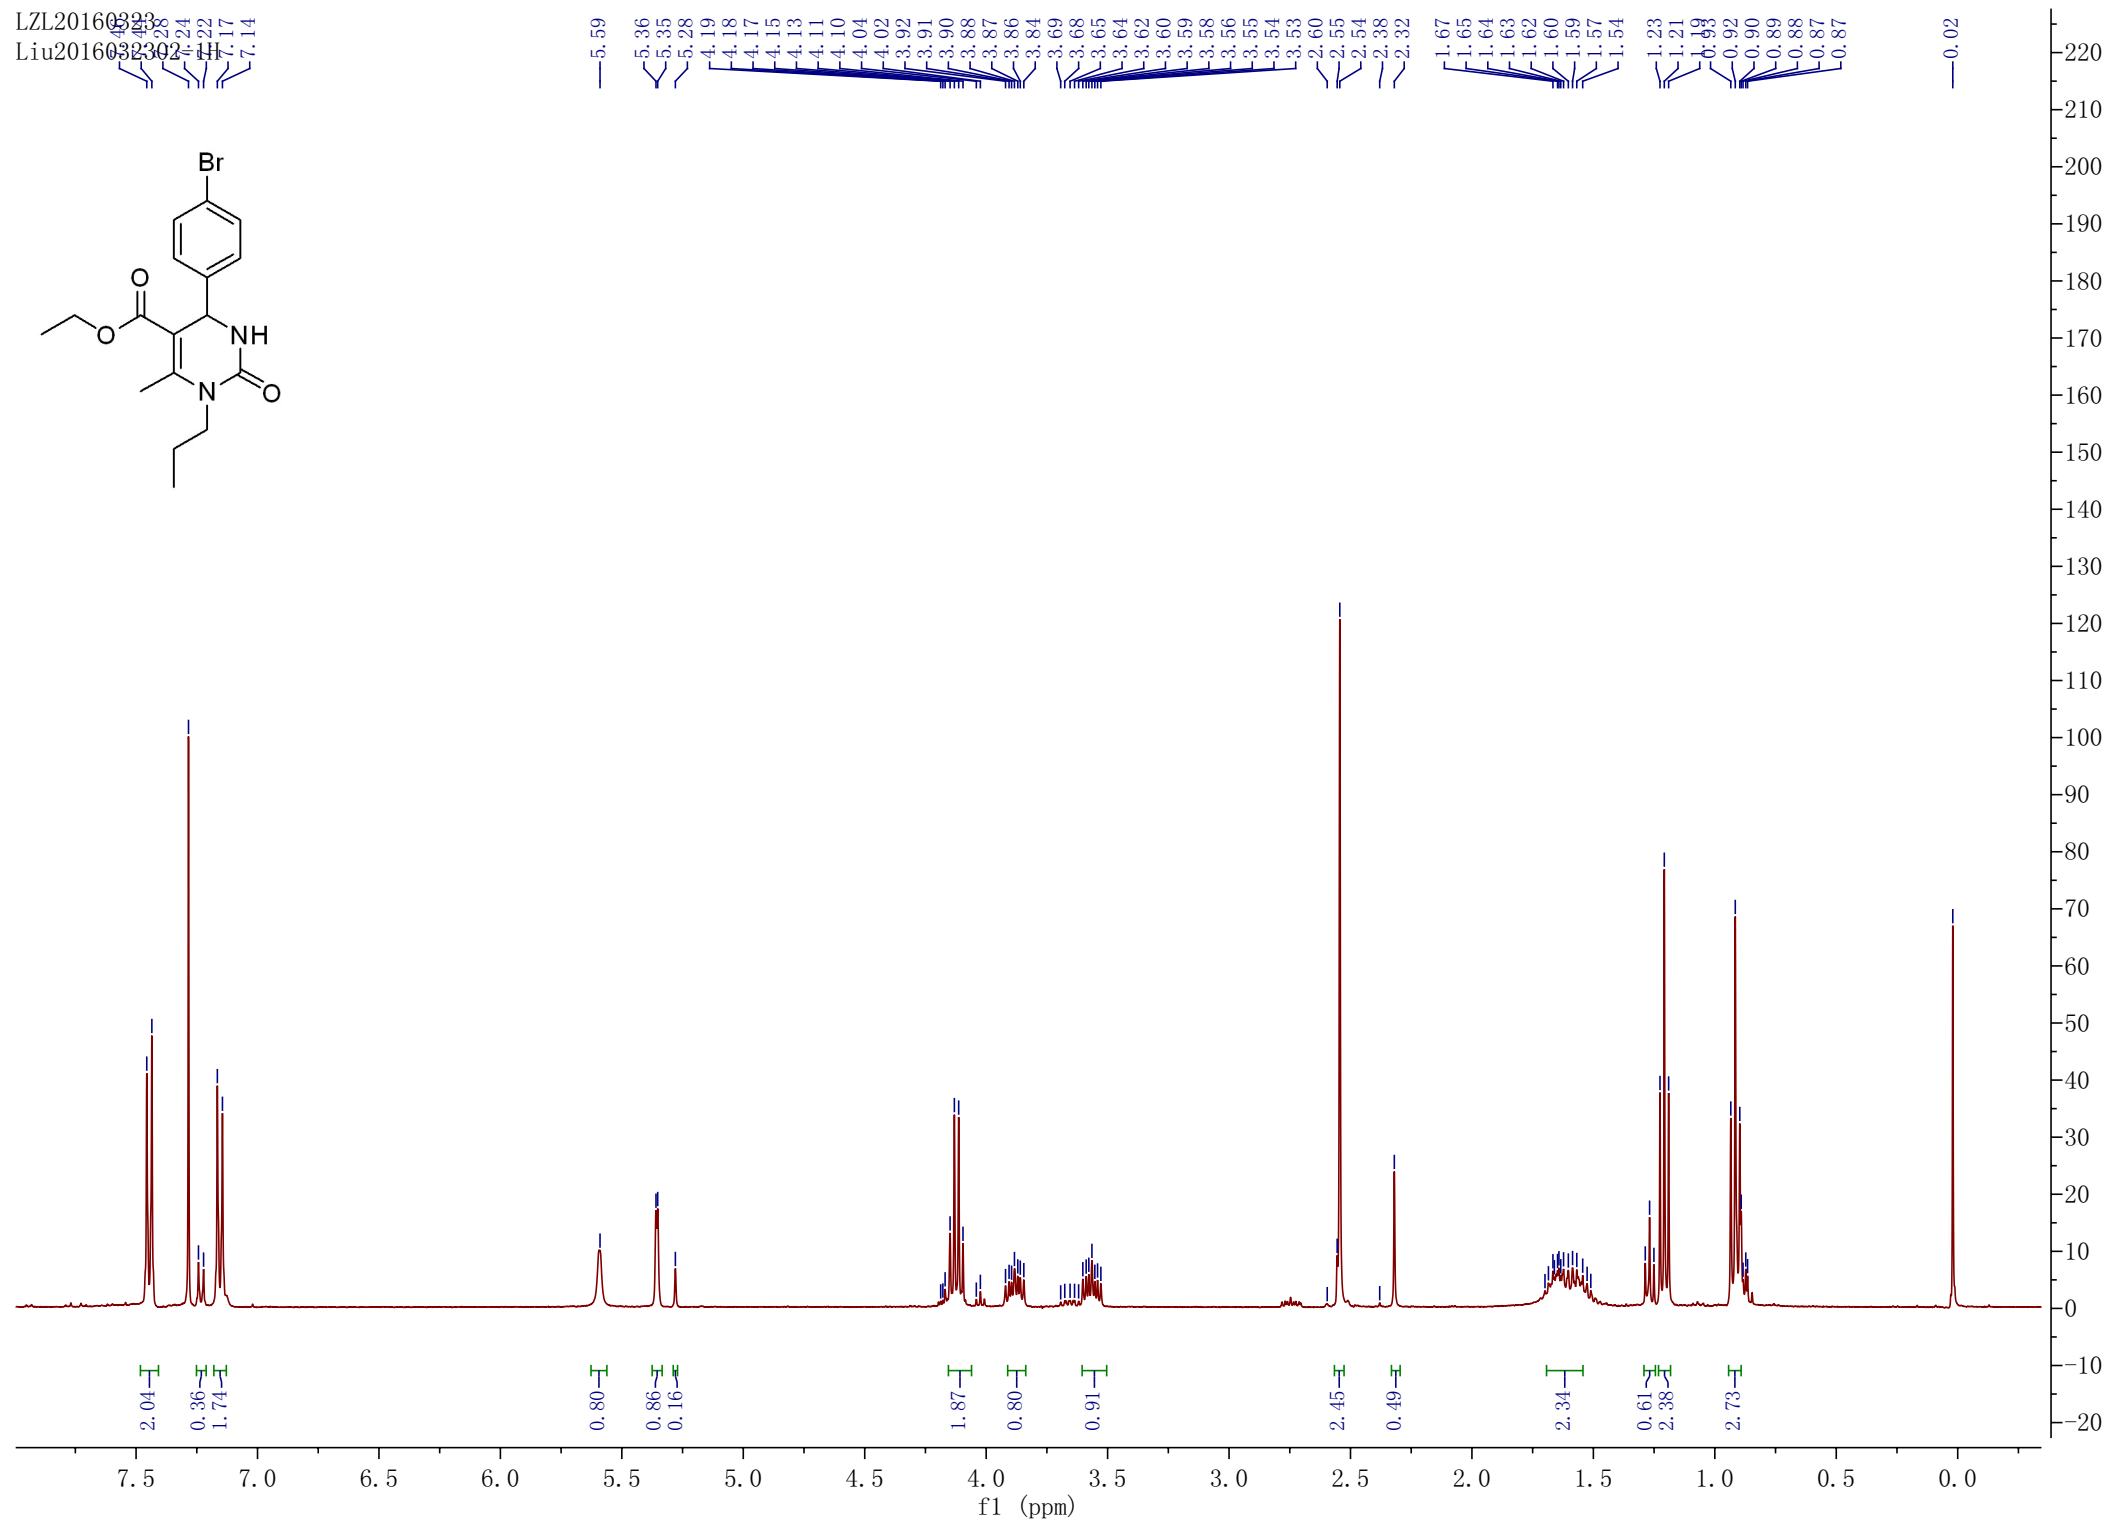

Supplement: s1 [file s1]

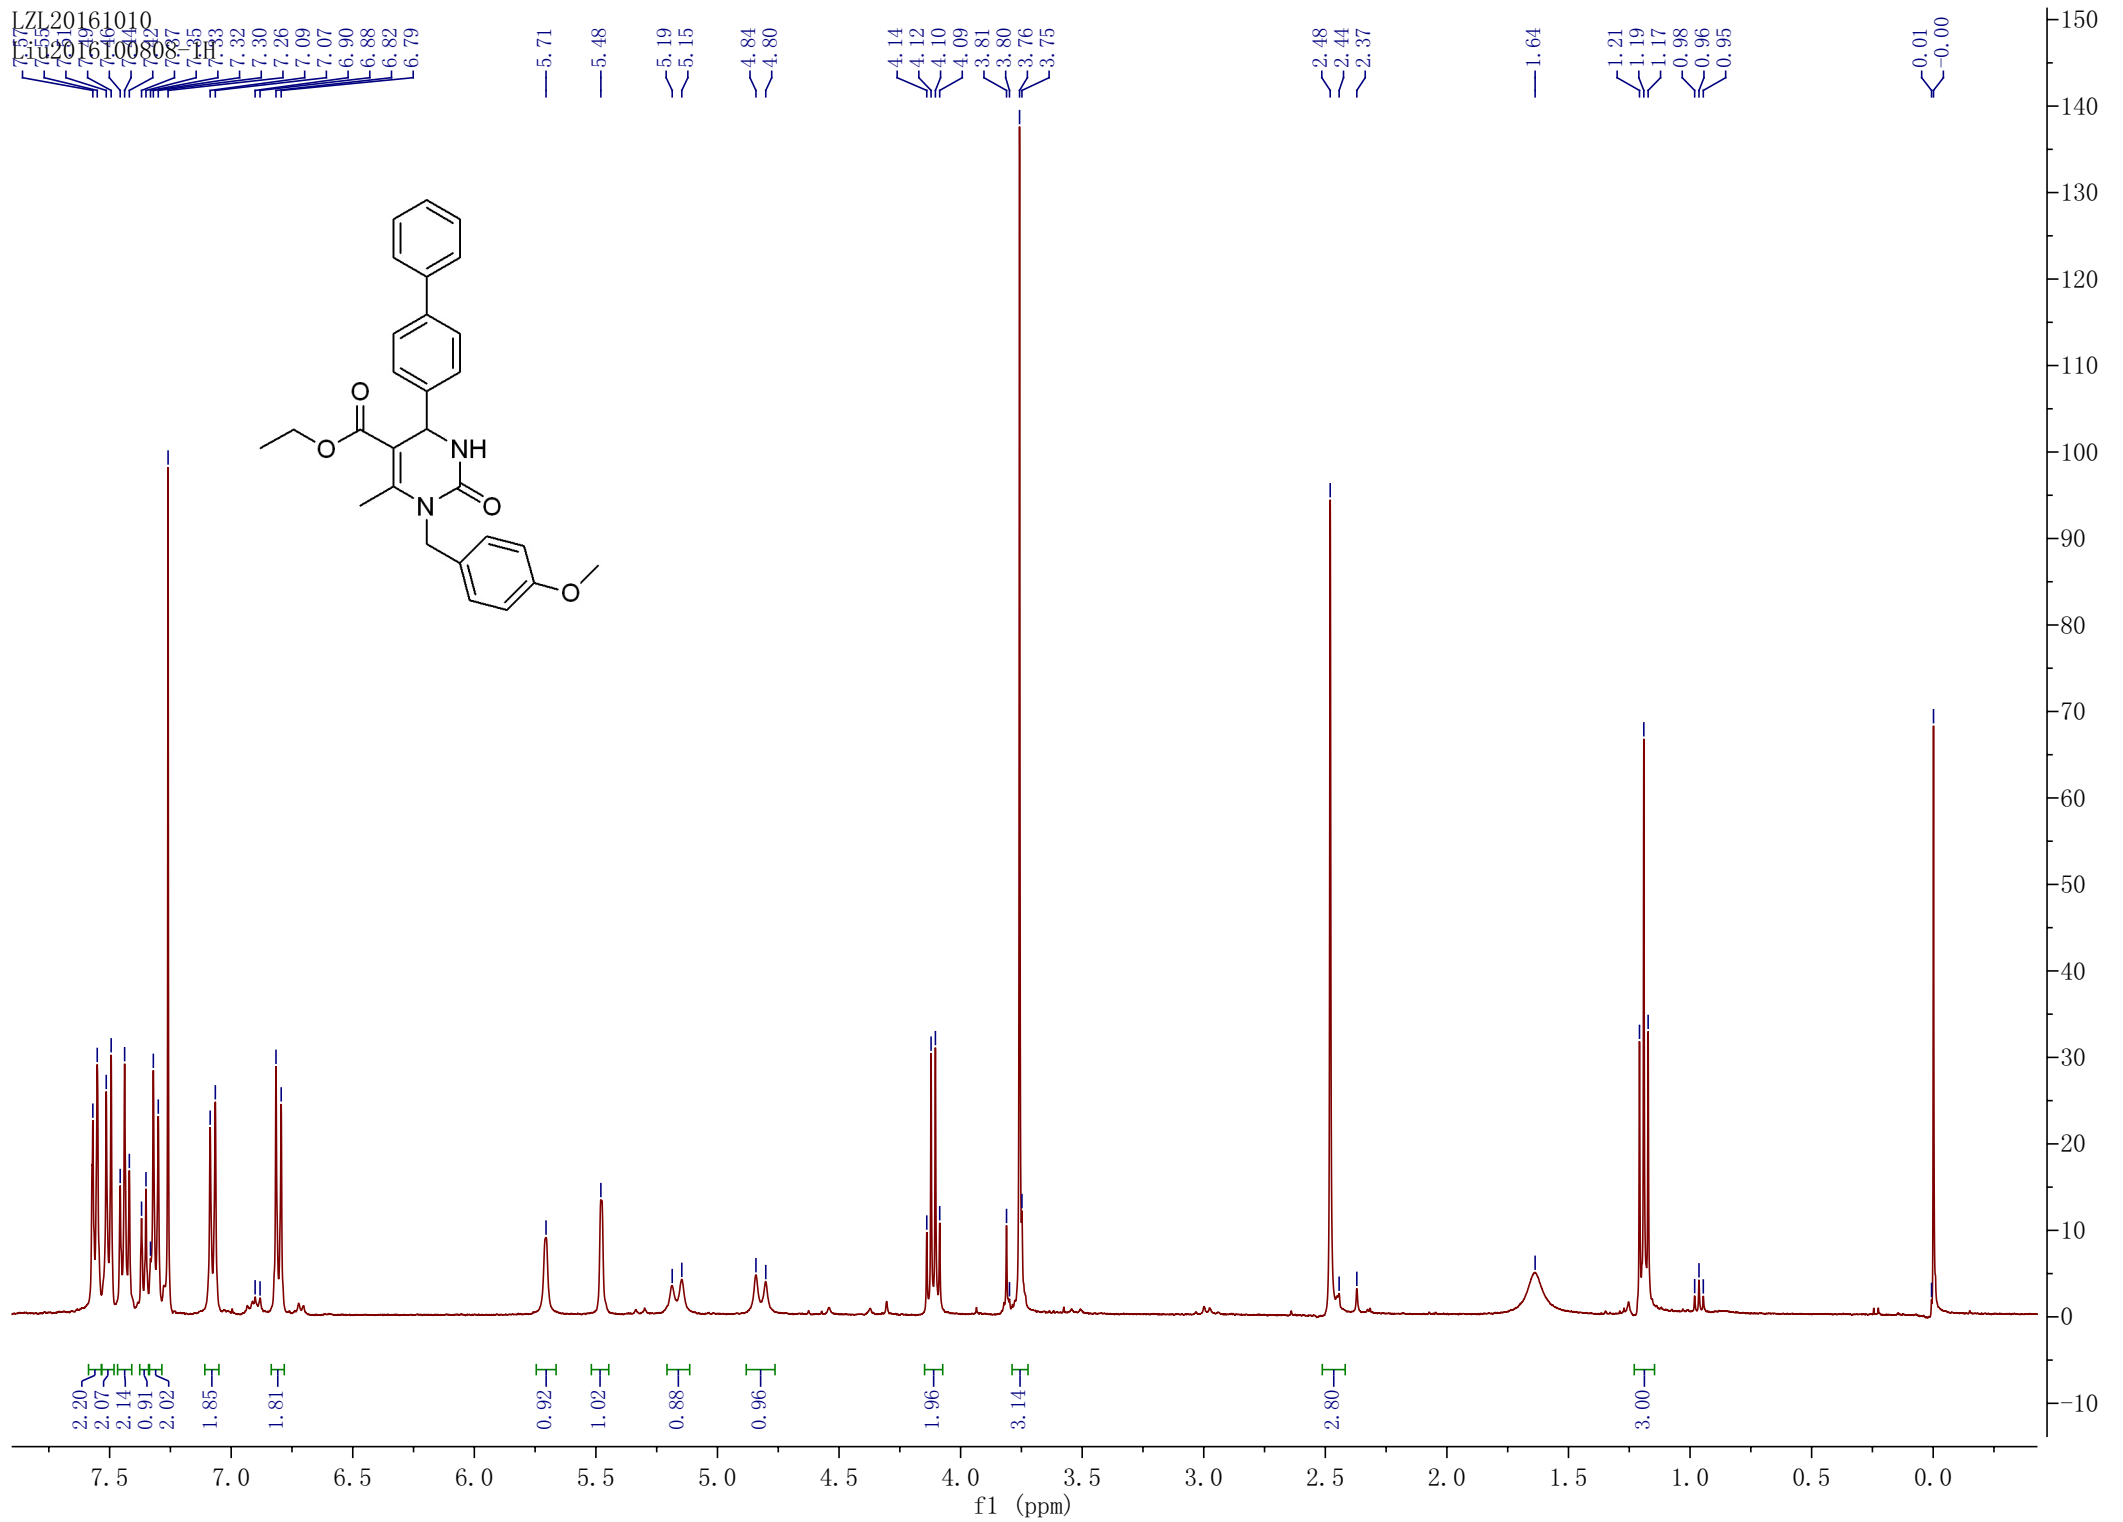

Supplement: s1 [file s1]

LZL20161018  
Liu2016101802-11

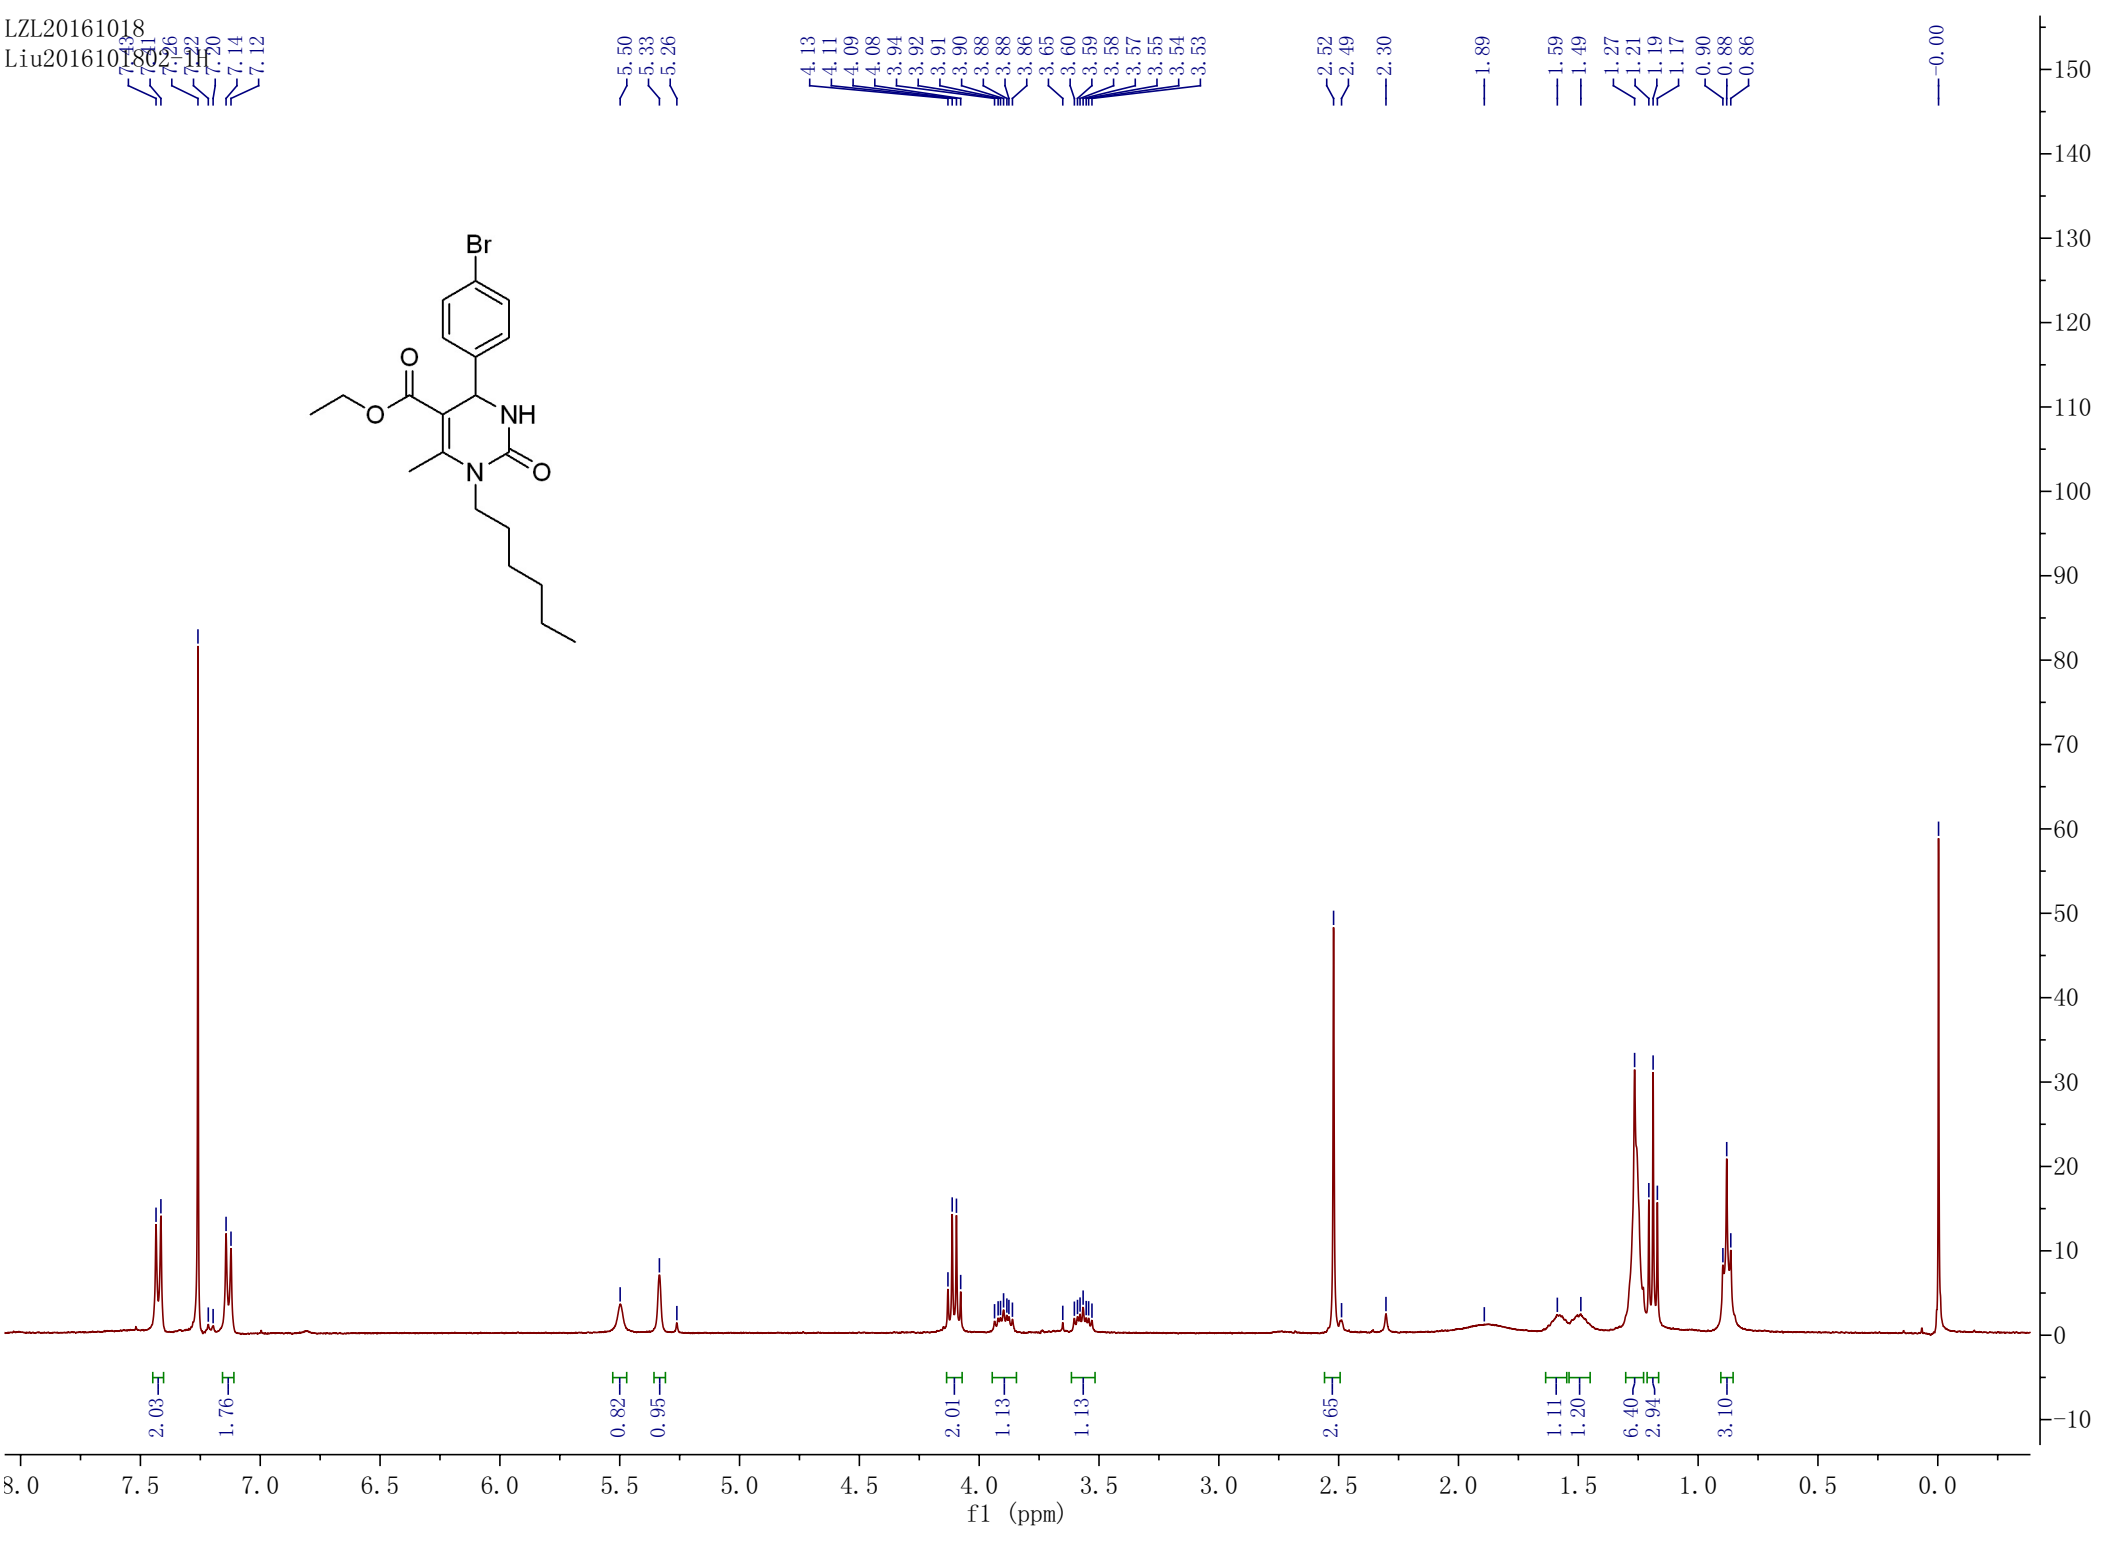

Supplement: s1 [file s1]

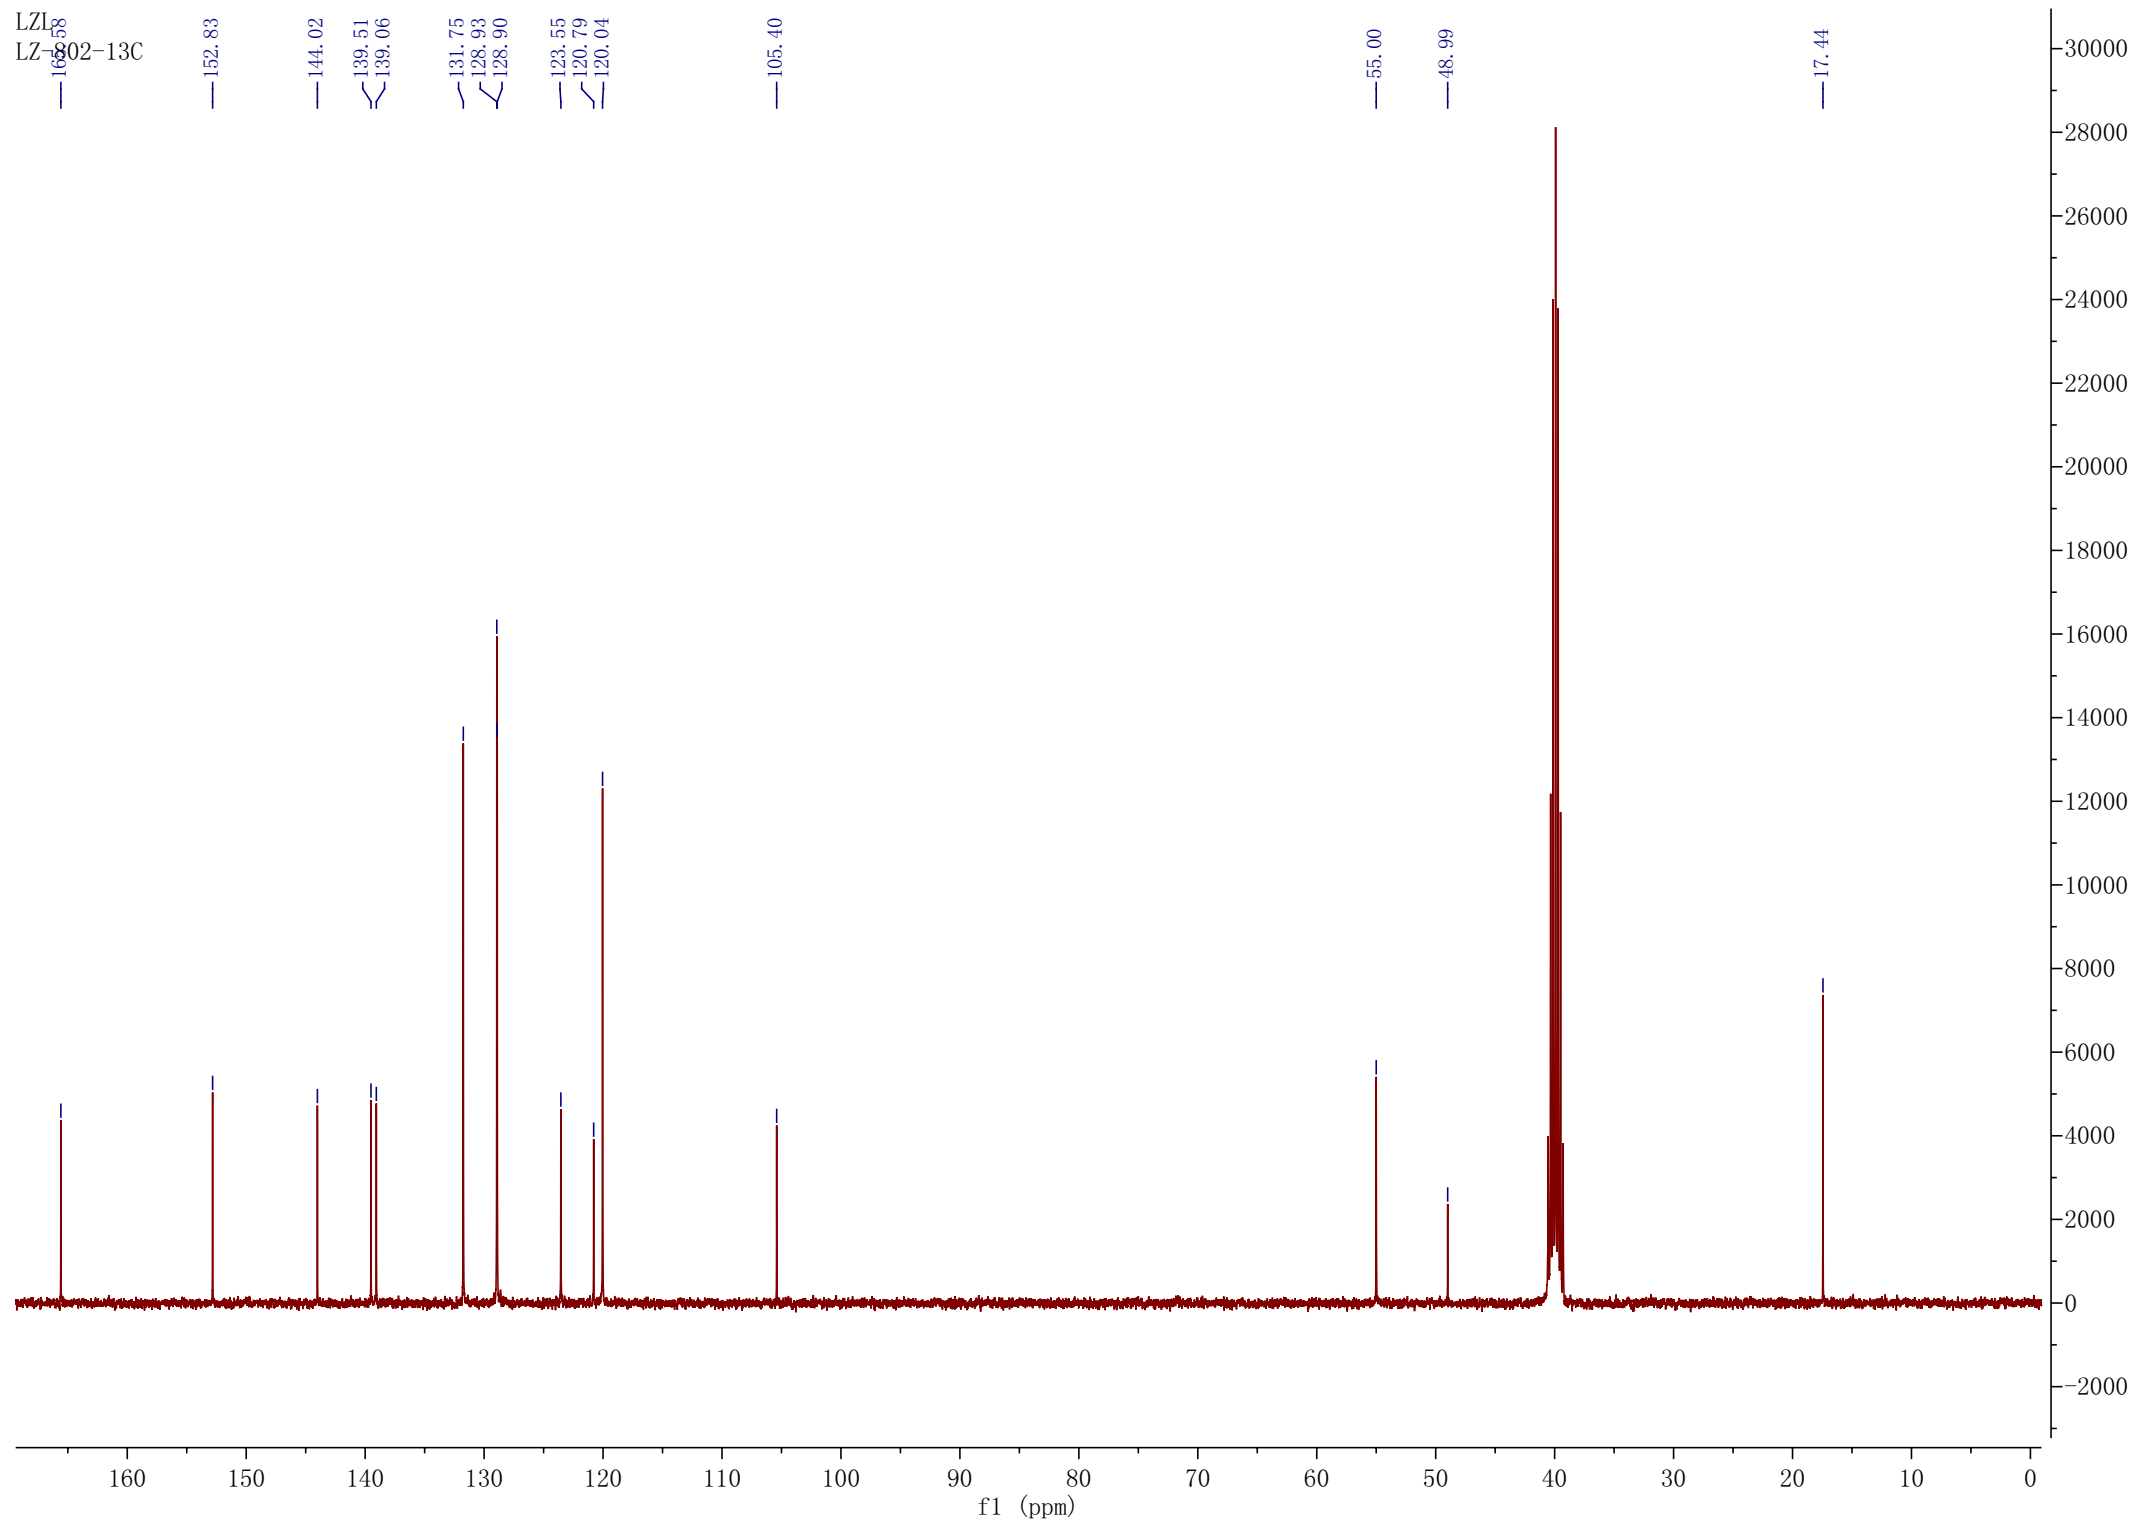

Supplement: s1 [file s1]

LZL20170523  
LZL2017052301-1H

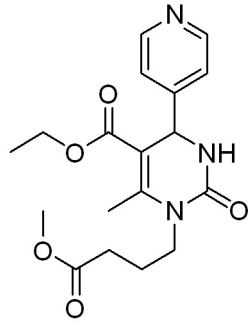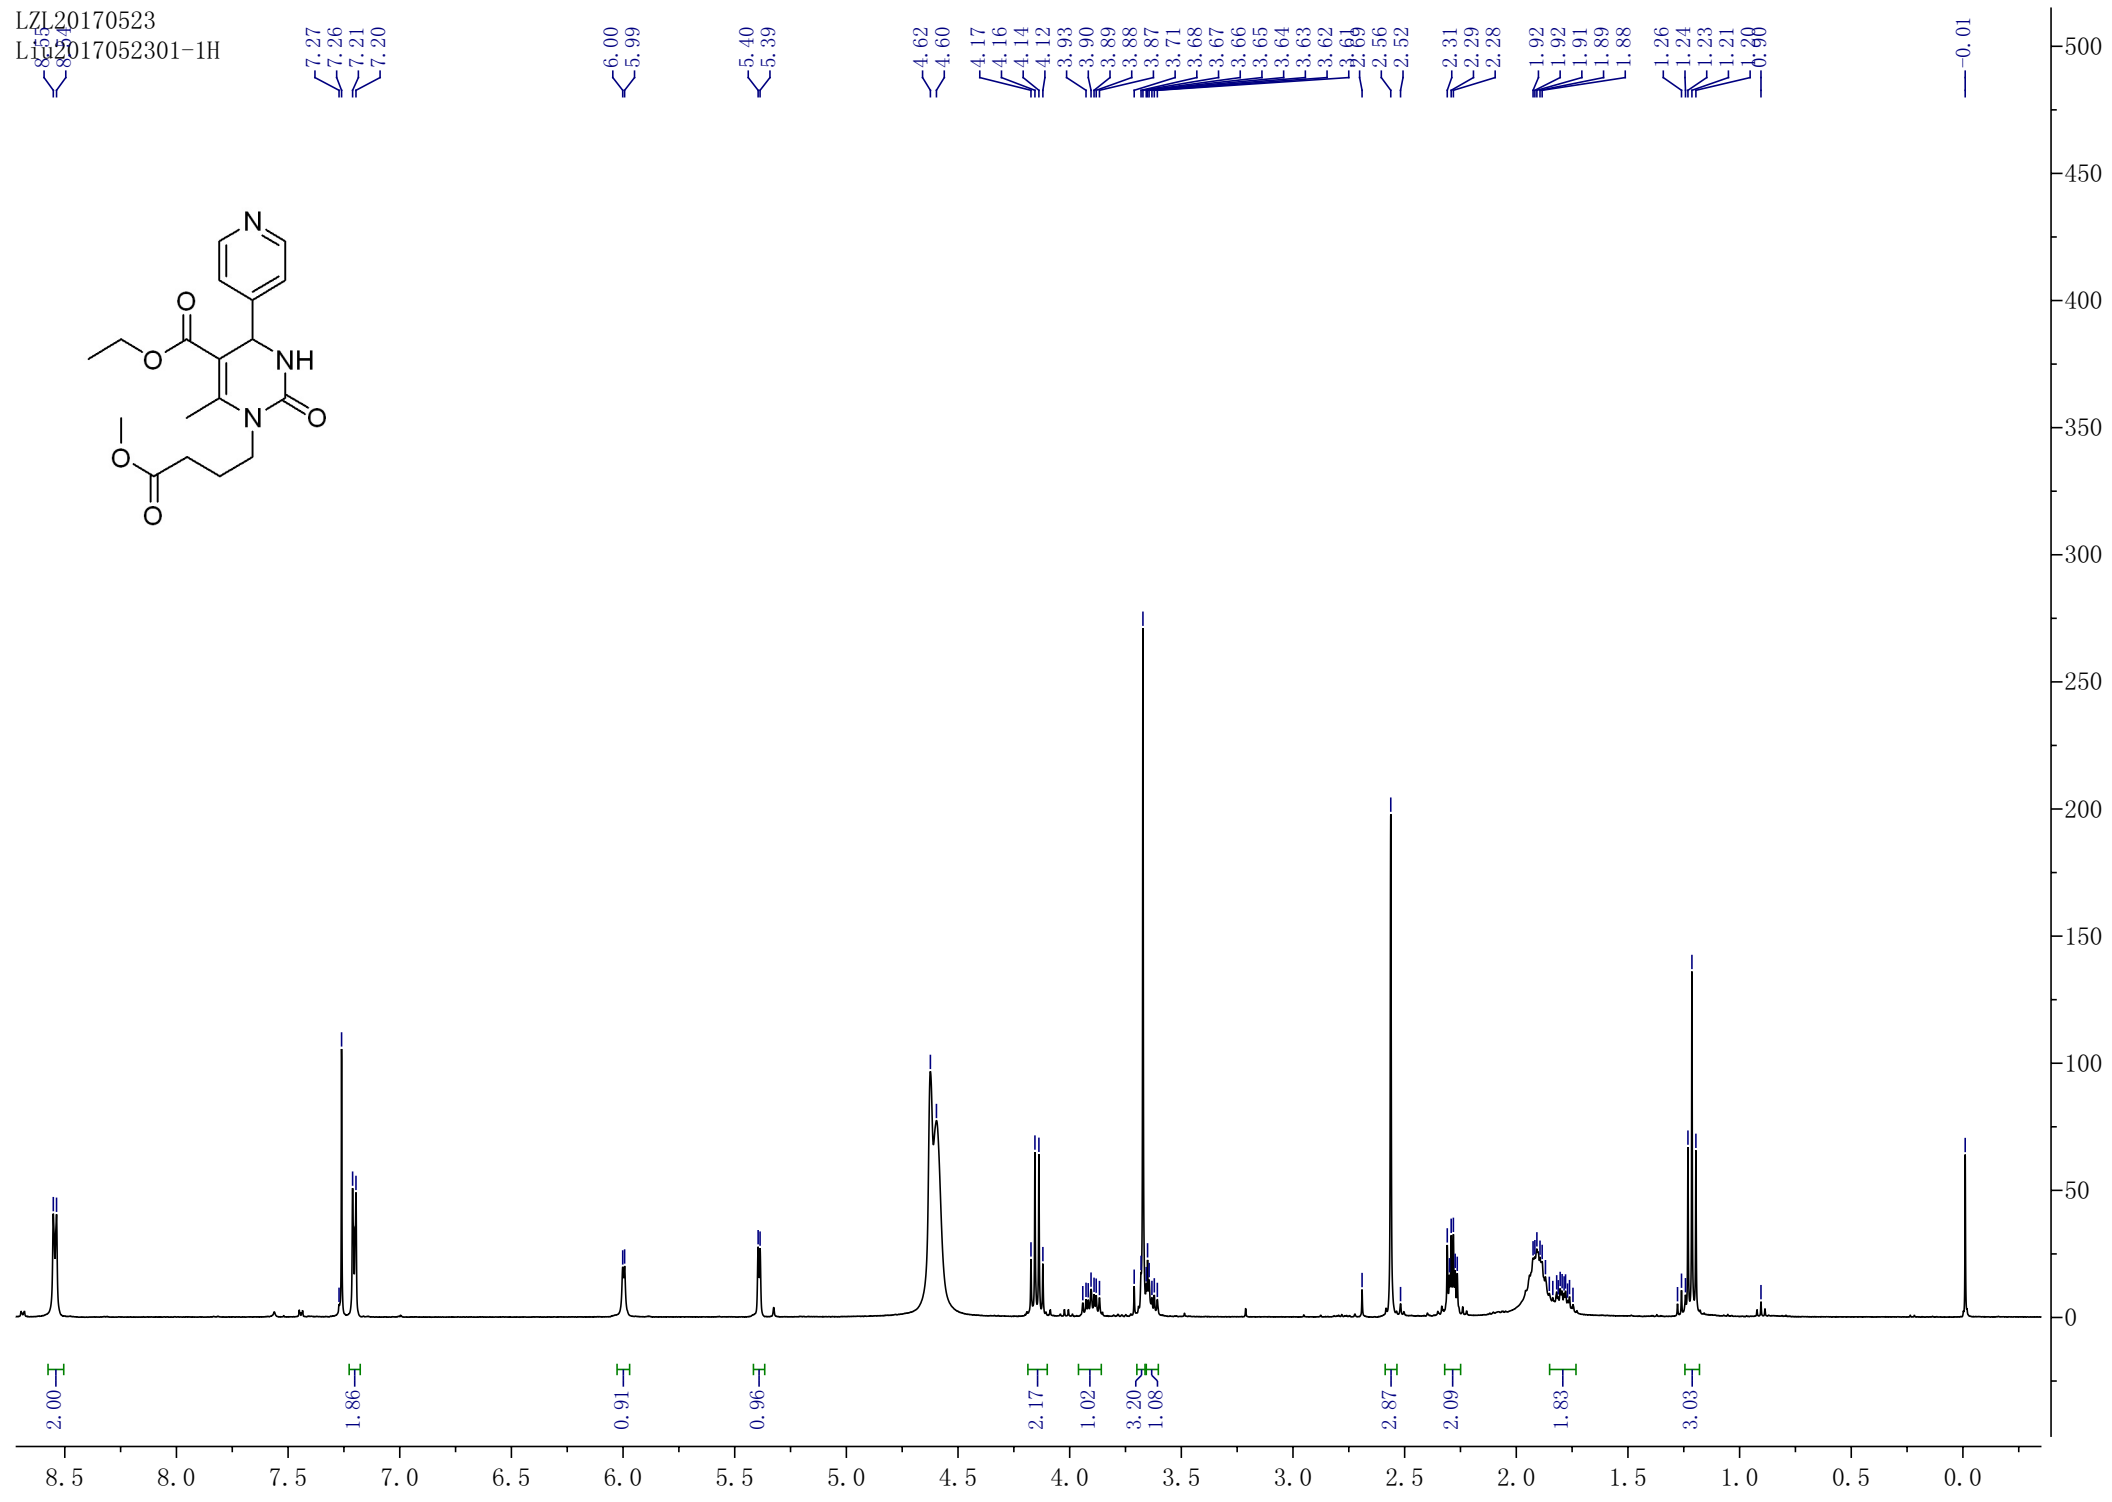

Supplement: s1 [file s1]

LZ120160623  
Liu2016062304-11

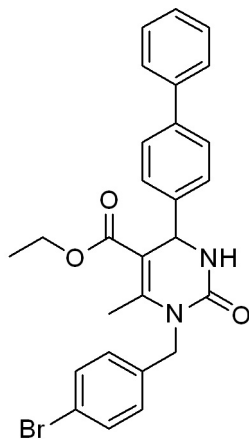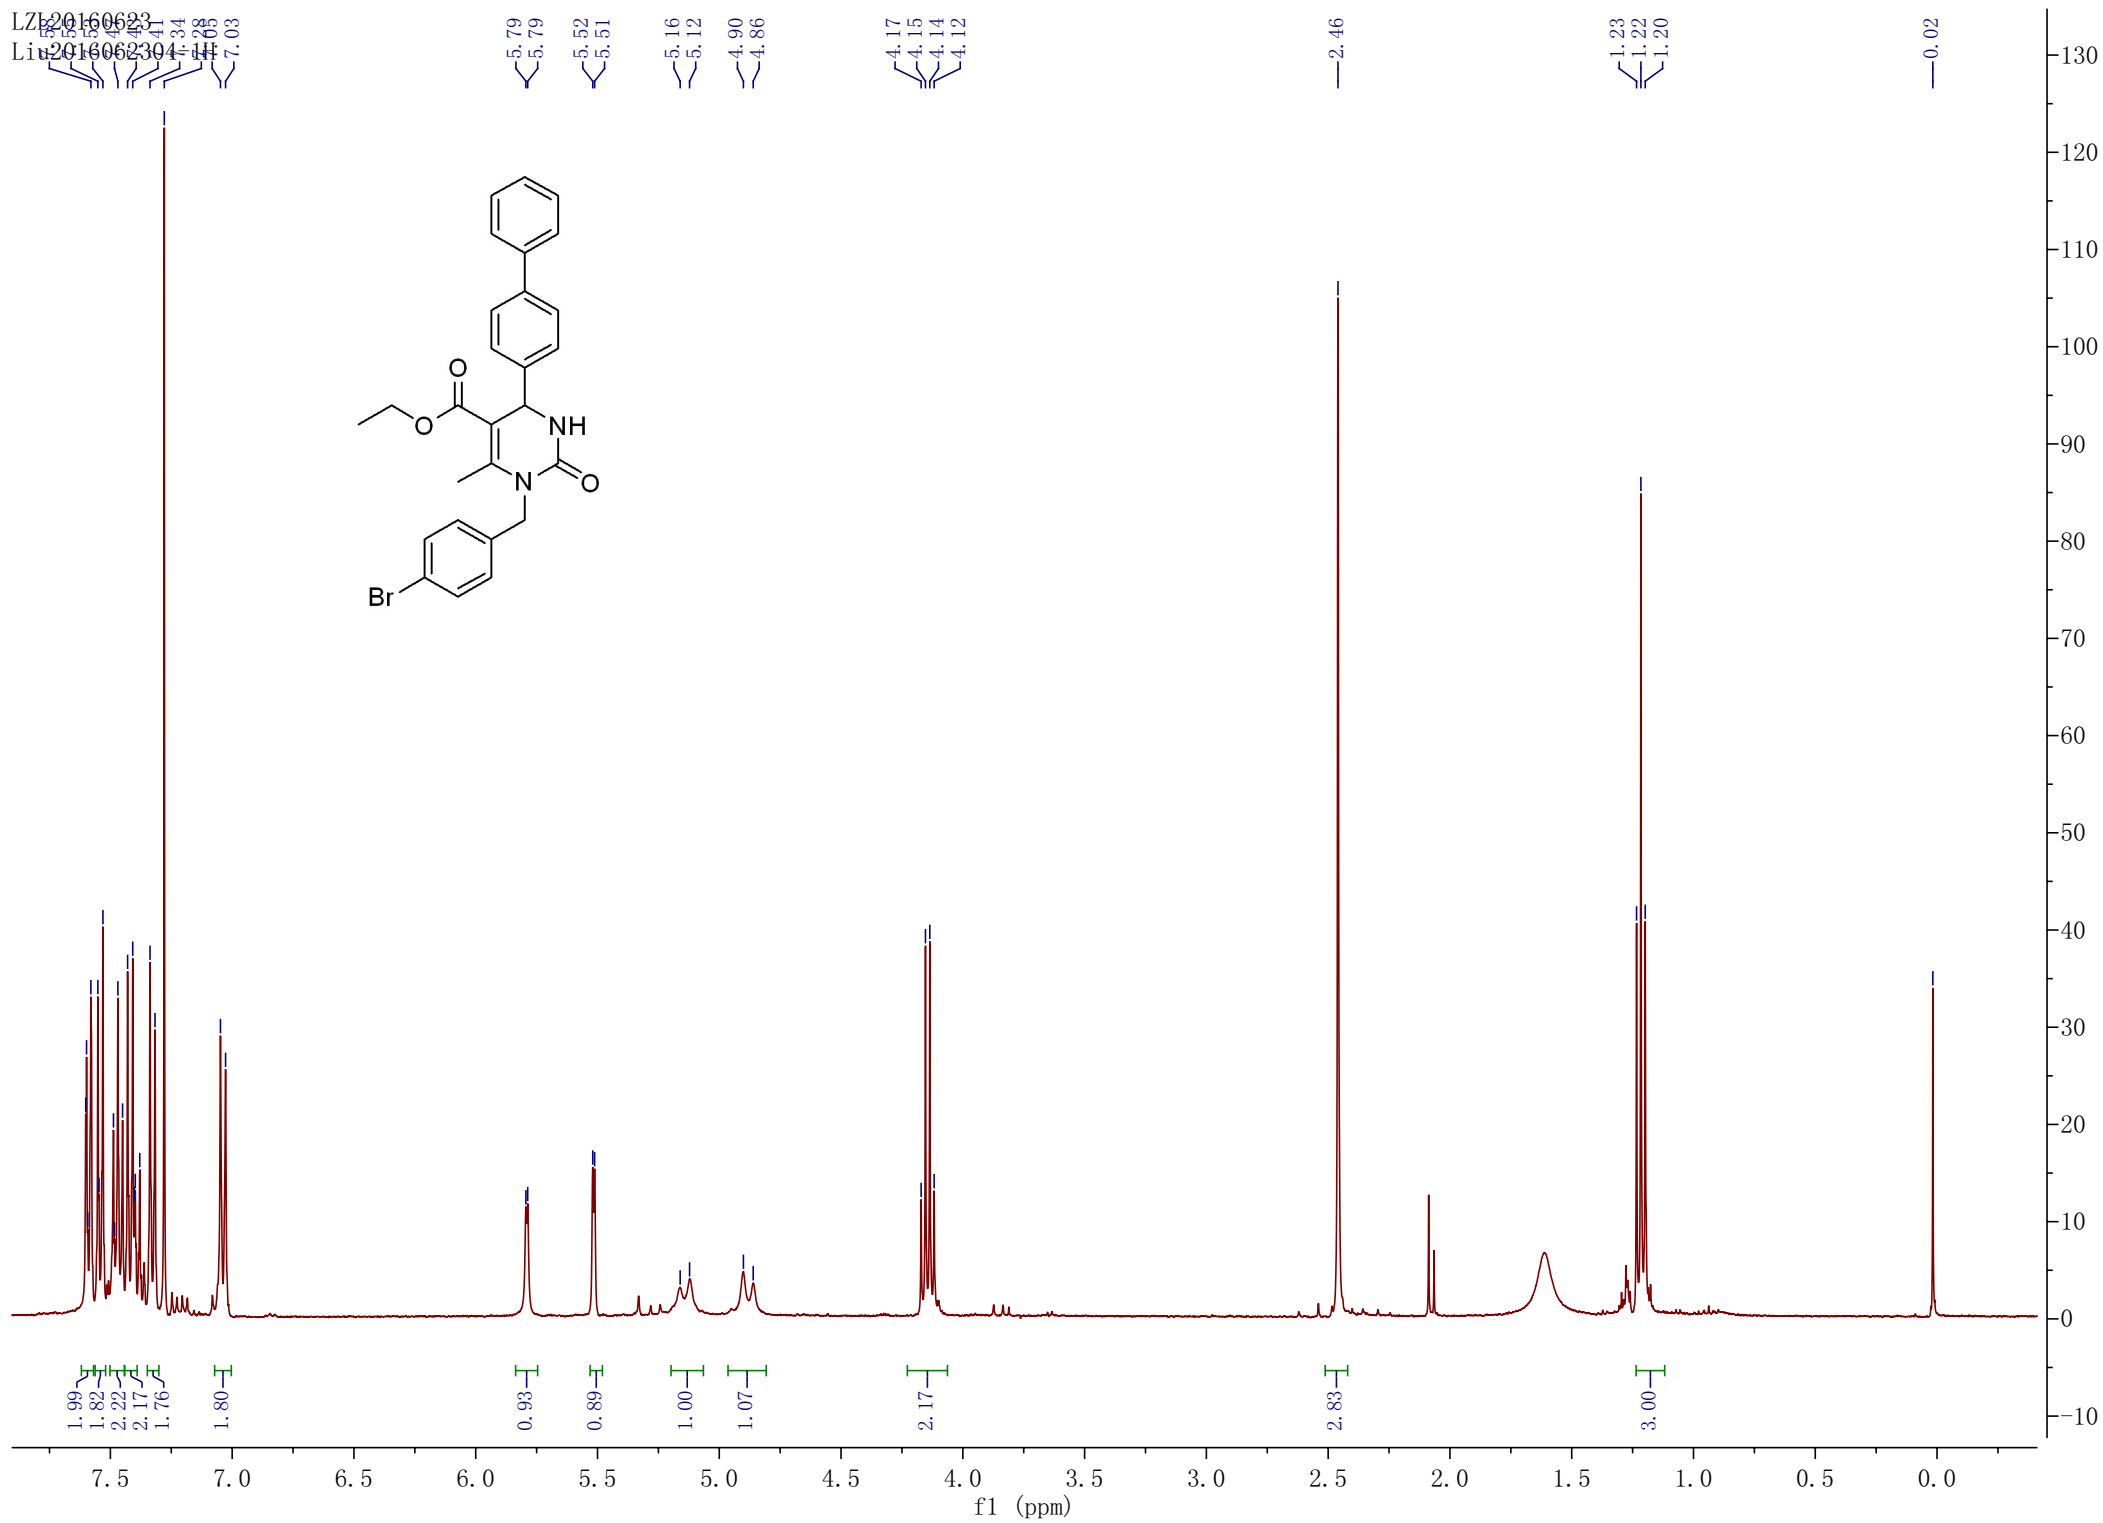

Supplement: s1 [file s1]

LZ-306

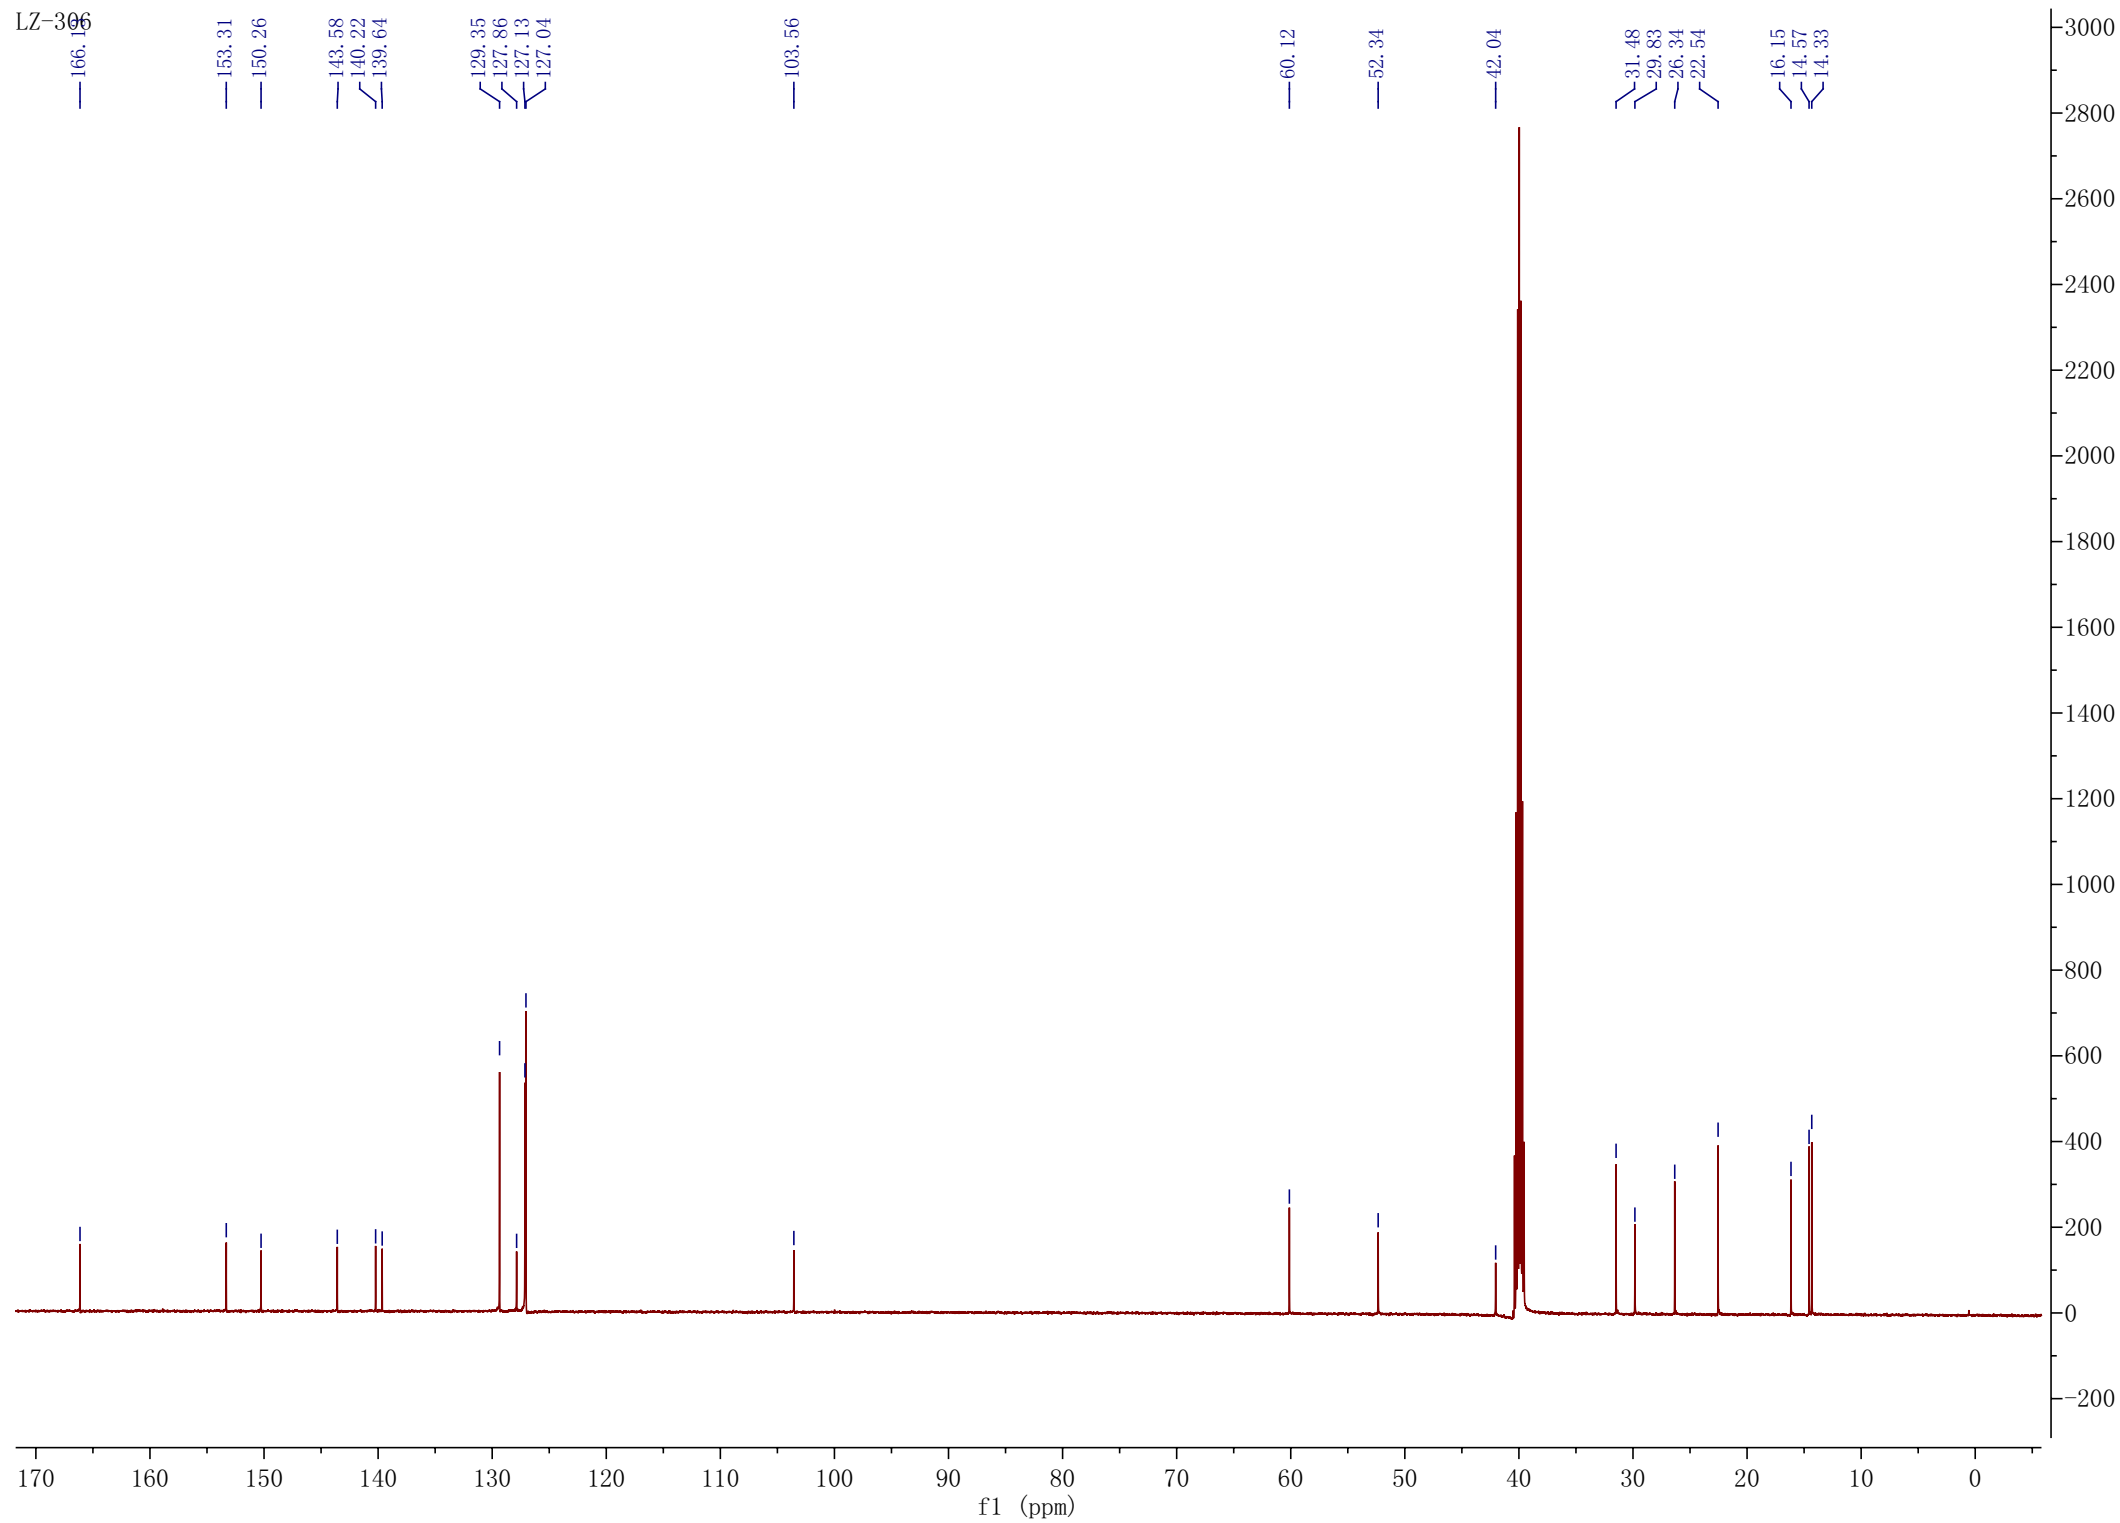

Supplement: s1 [file s1]

LZL20160623  
Liu20160623-1H

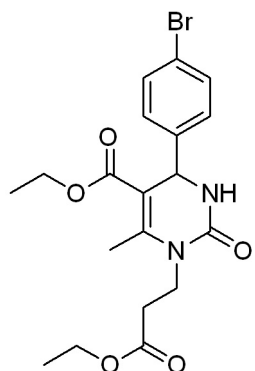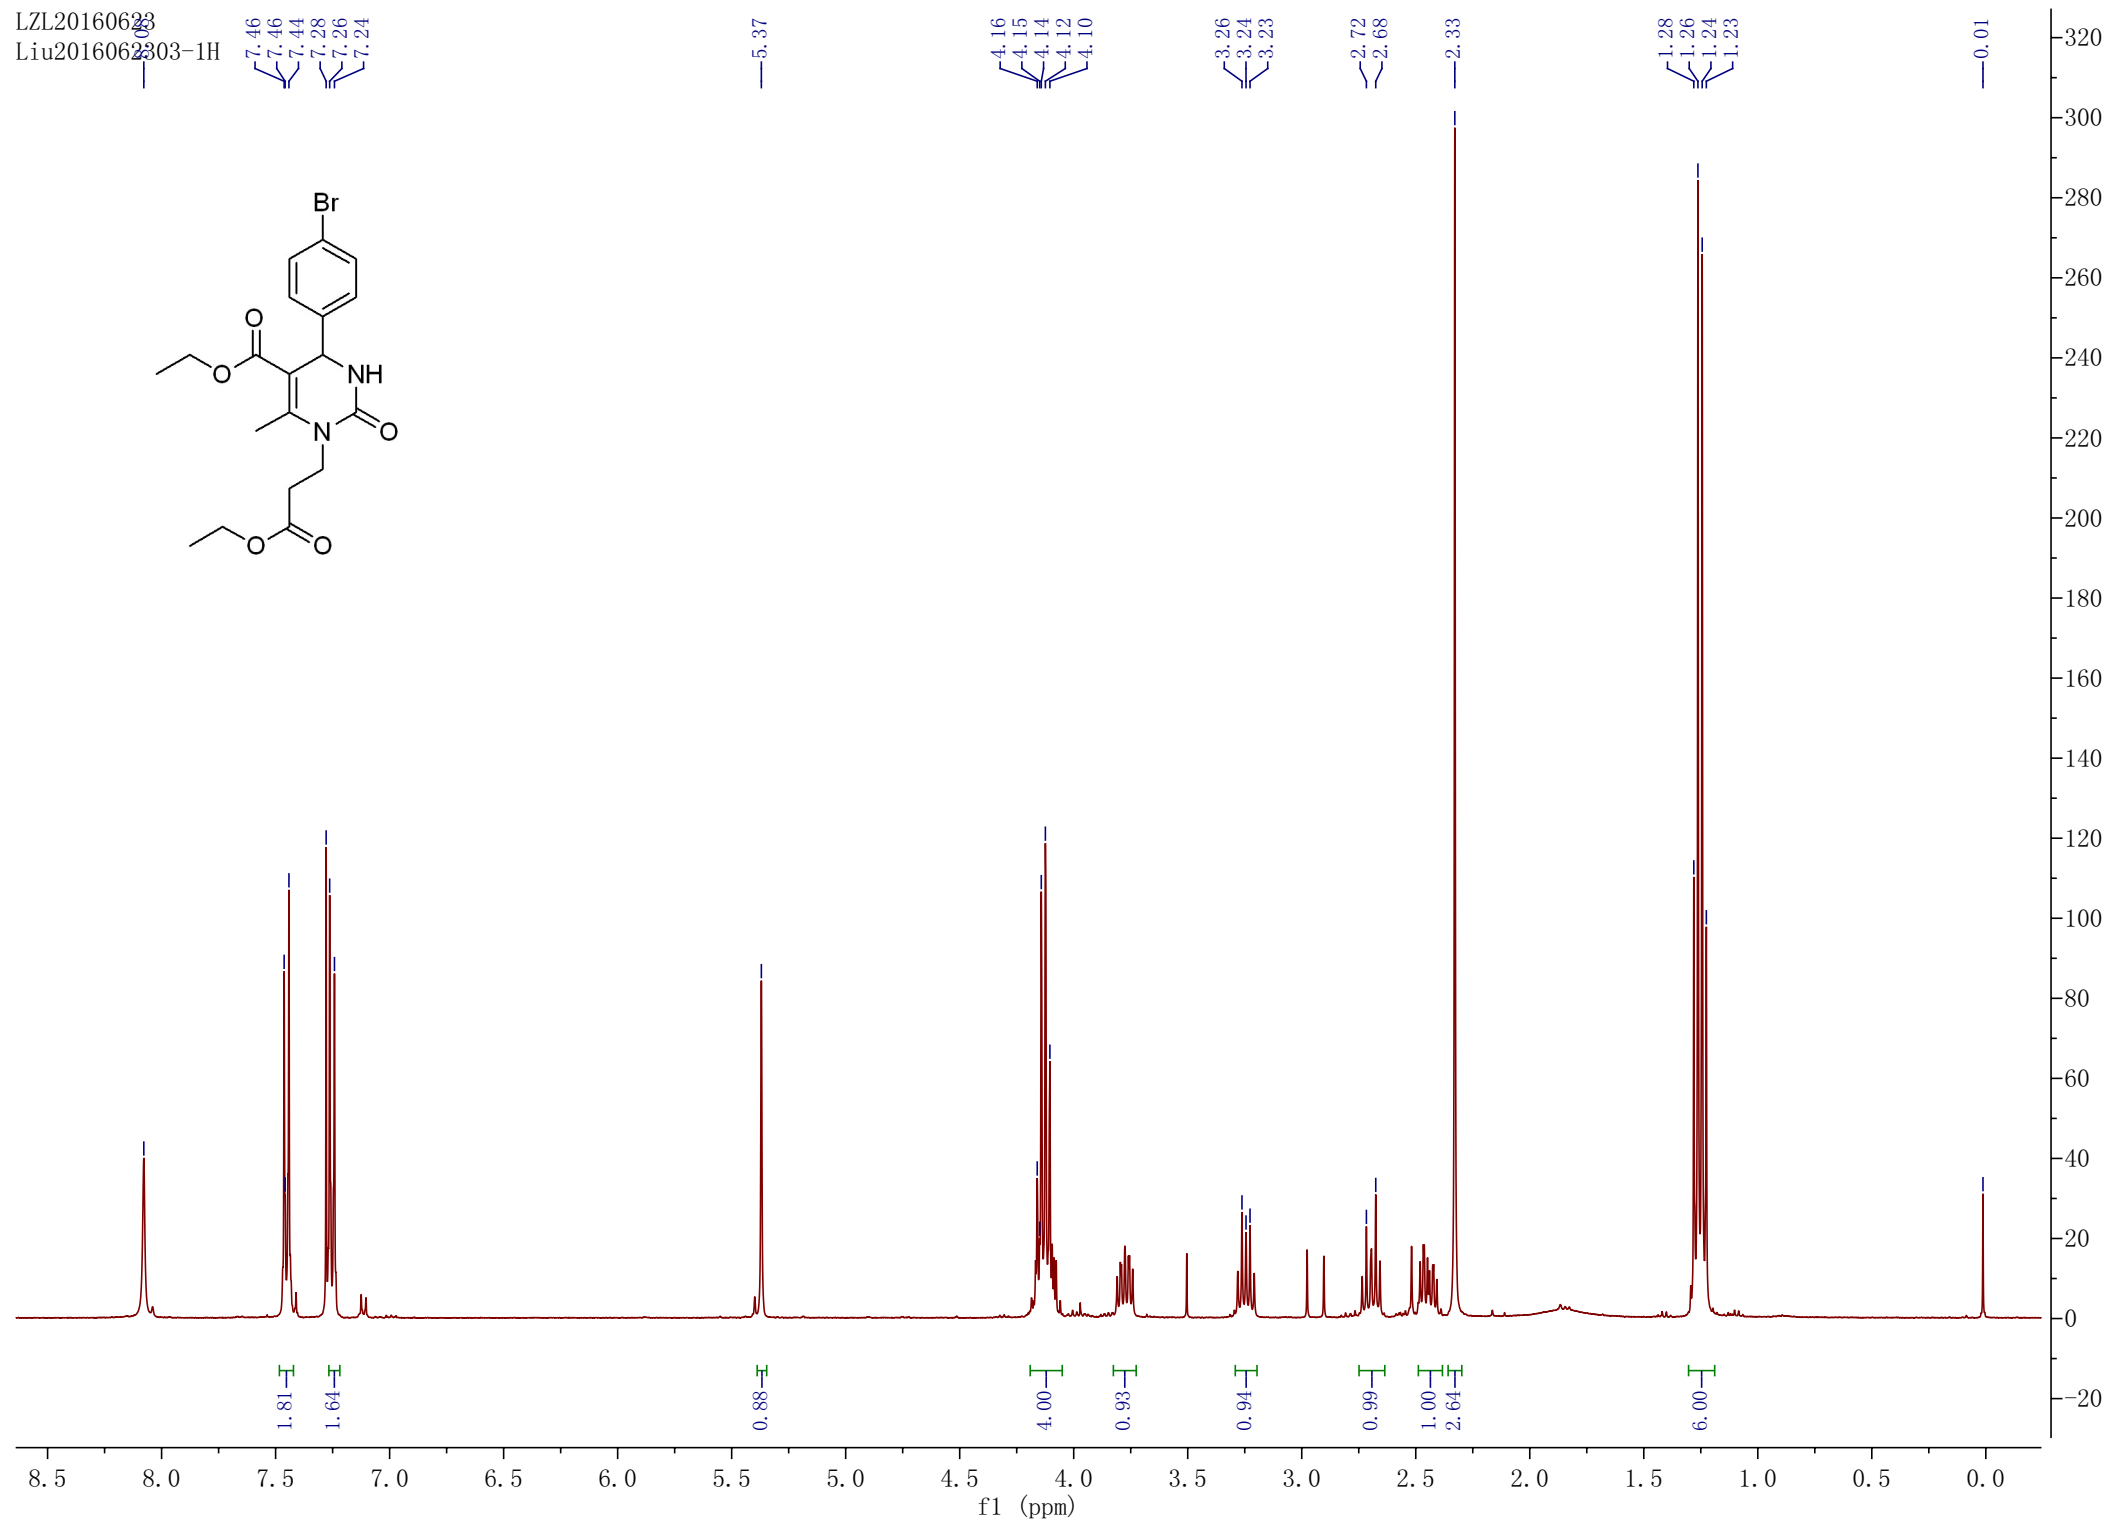

Supplement: s1 [file s1]

LZL20170619  
Liu17061904-1H

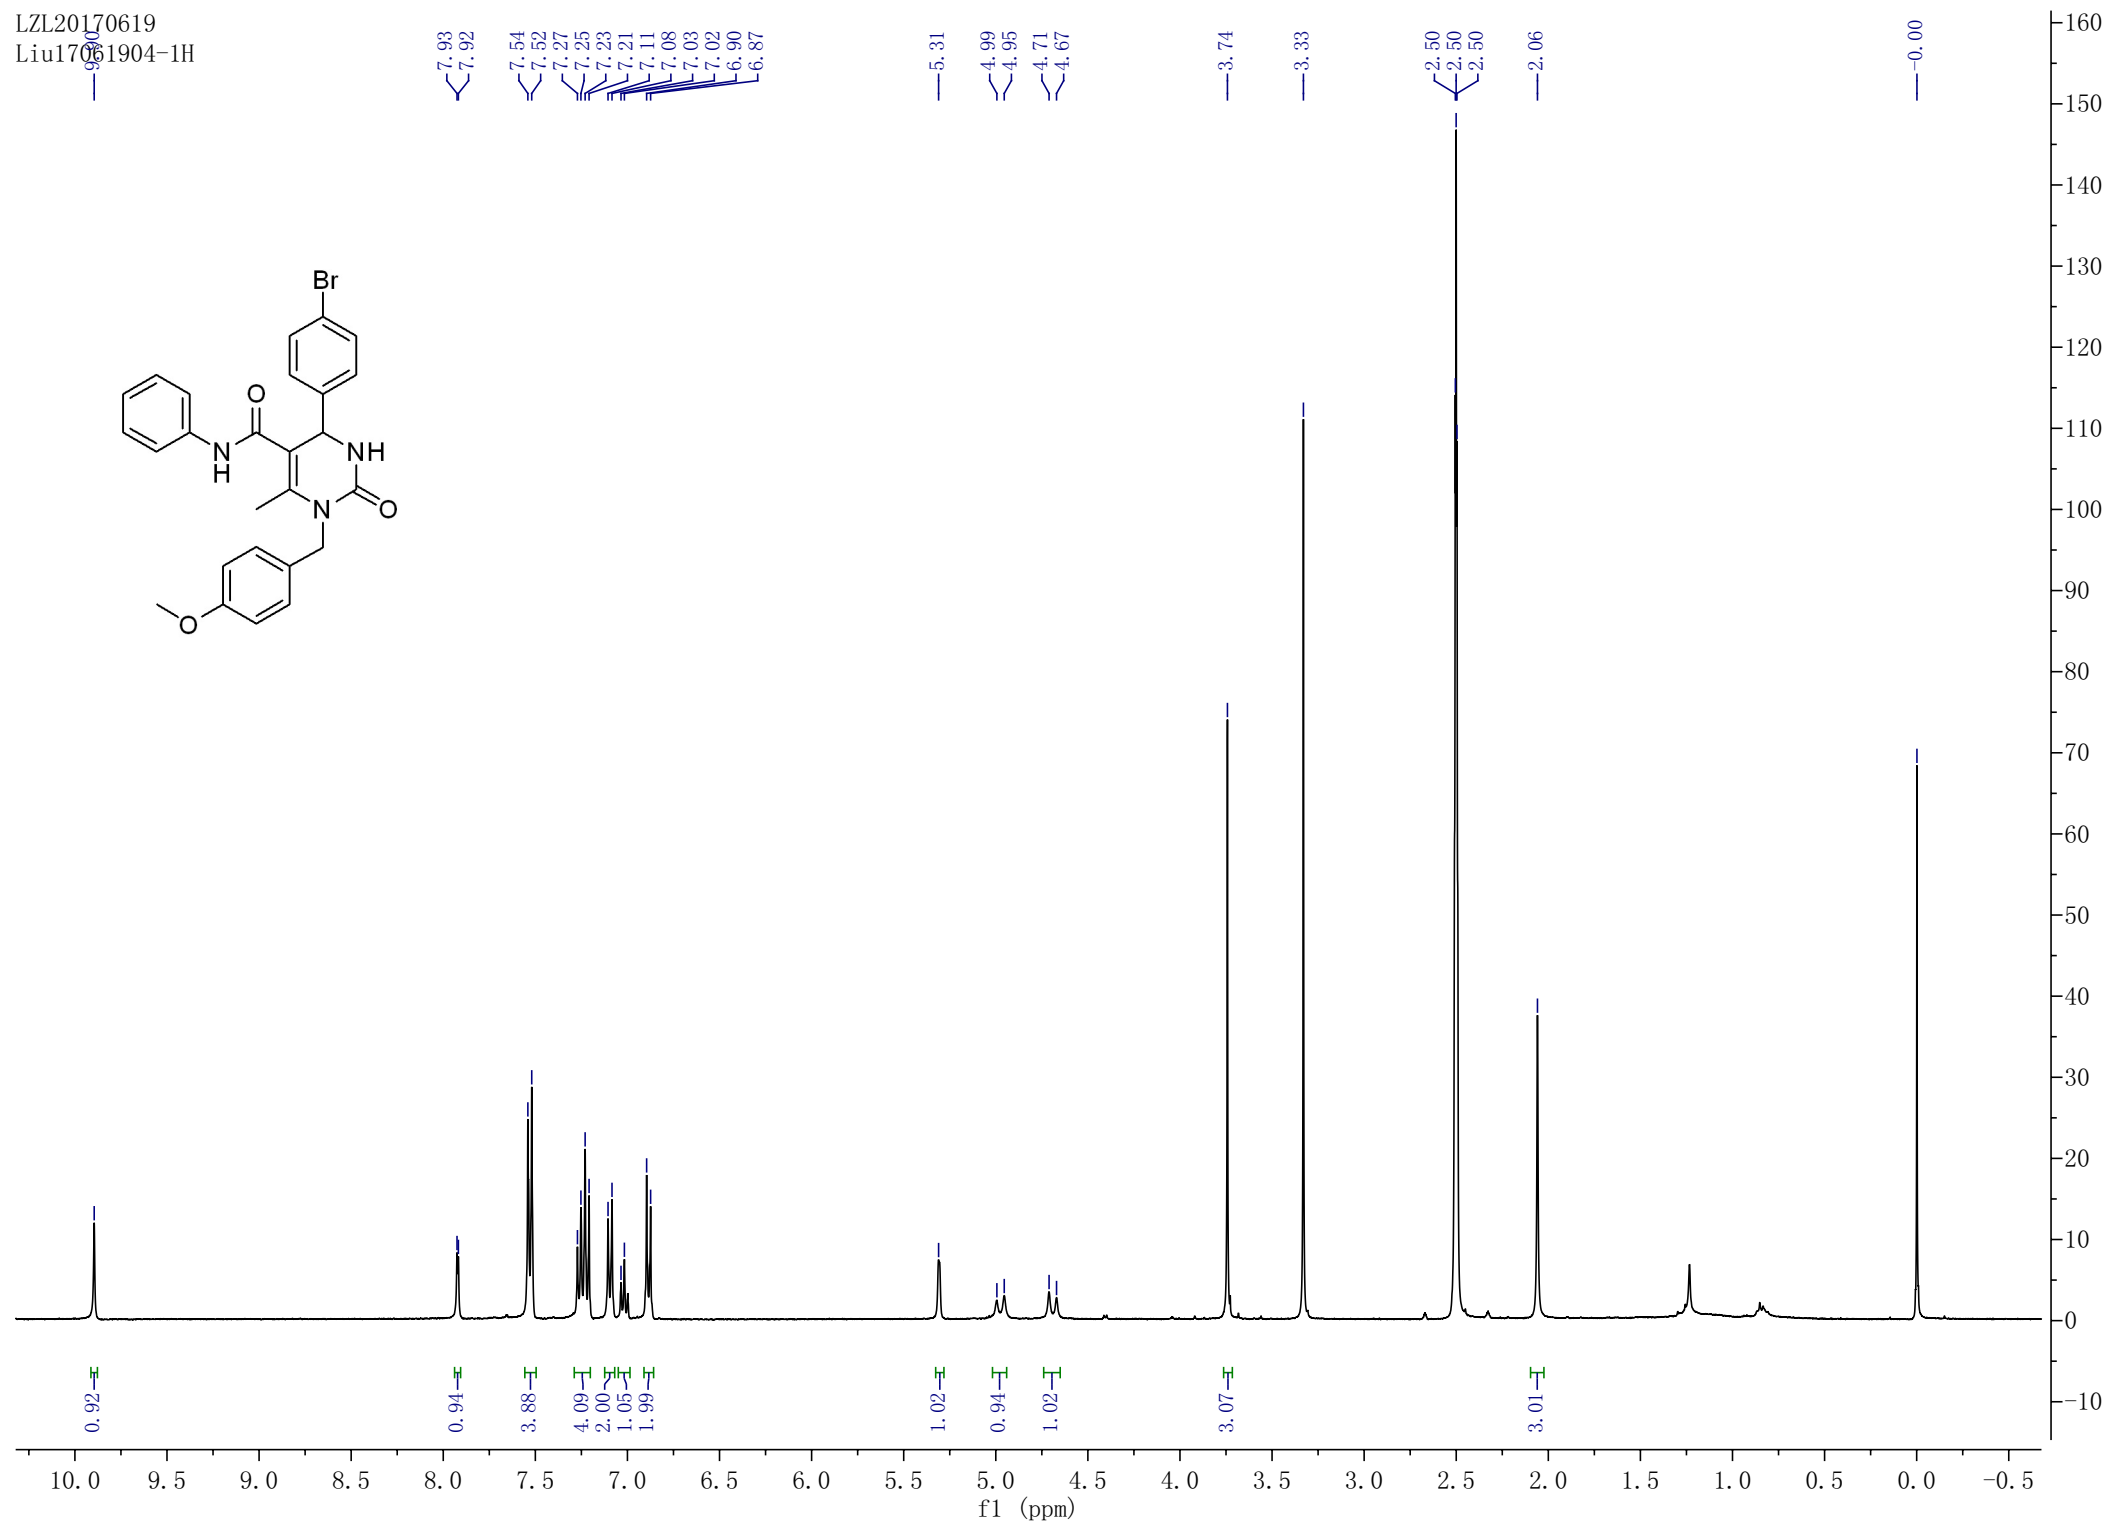

Supplement: s1 [file s1]

LZL20170619  
Liu17061903-1H

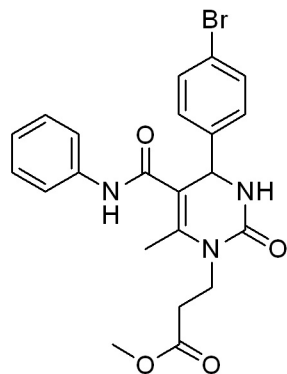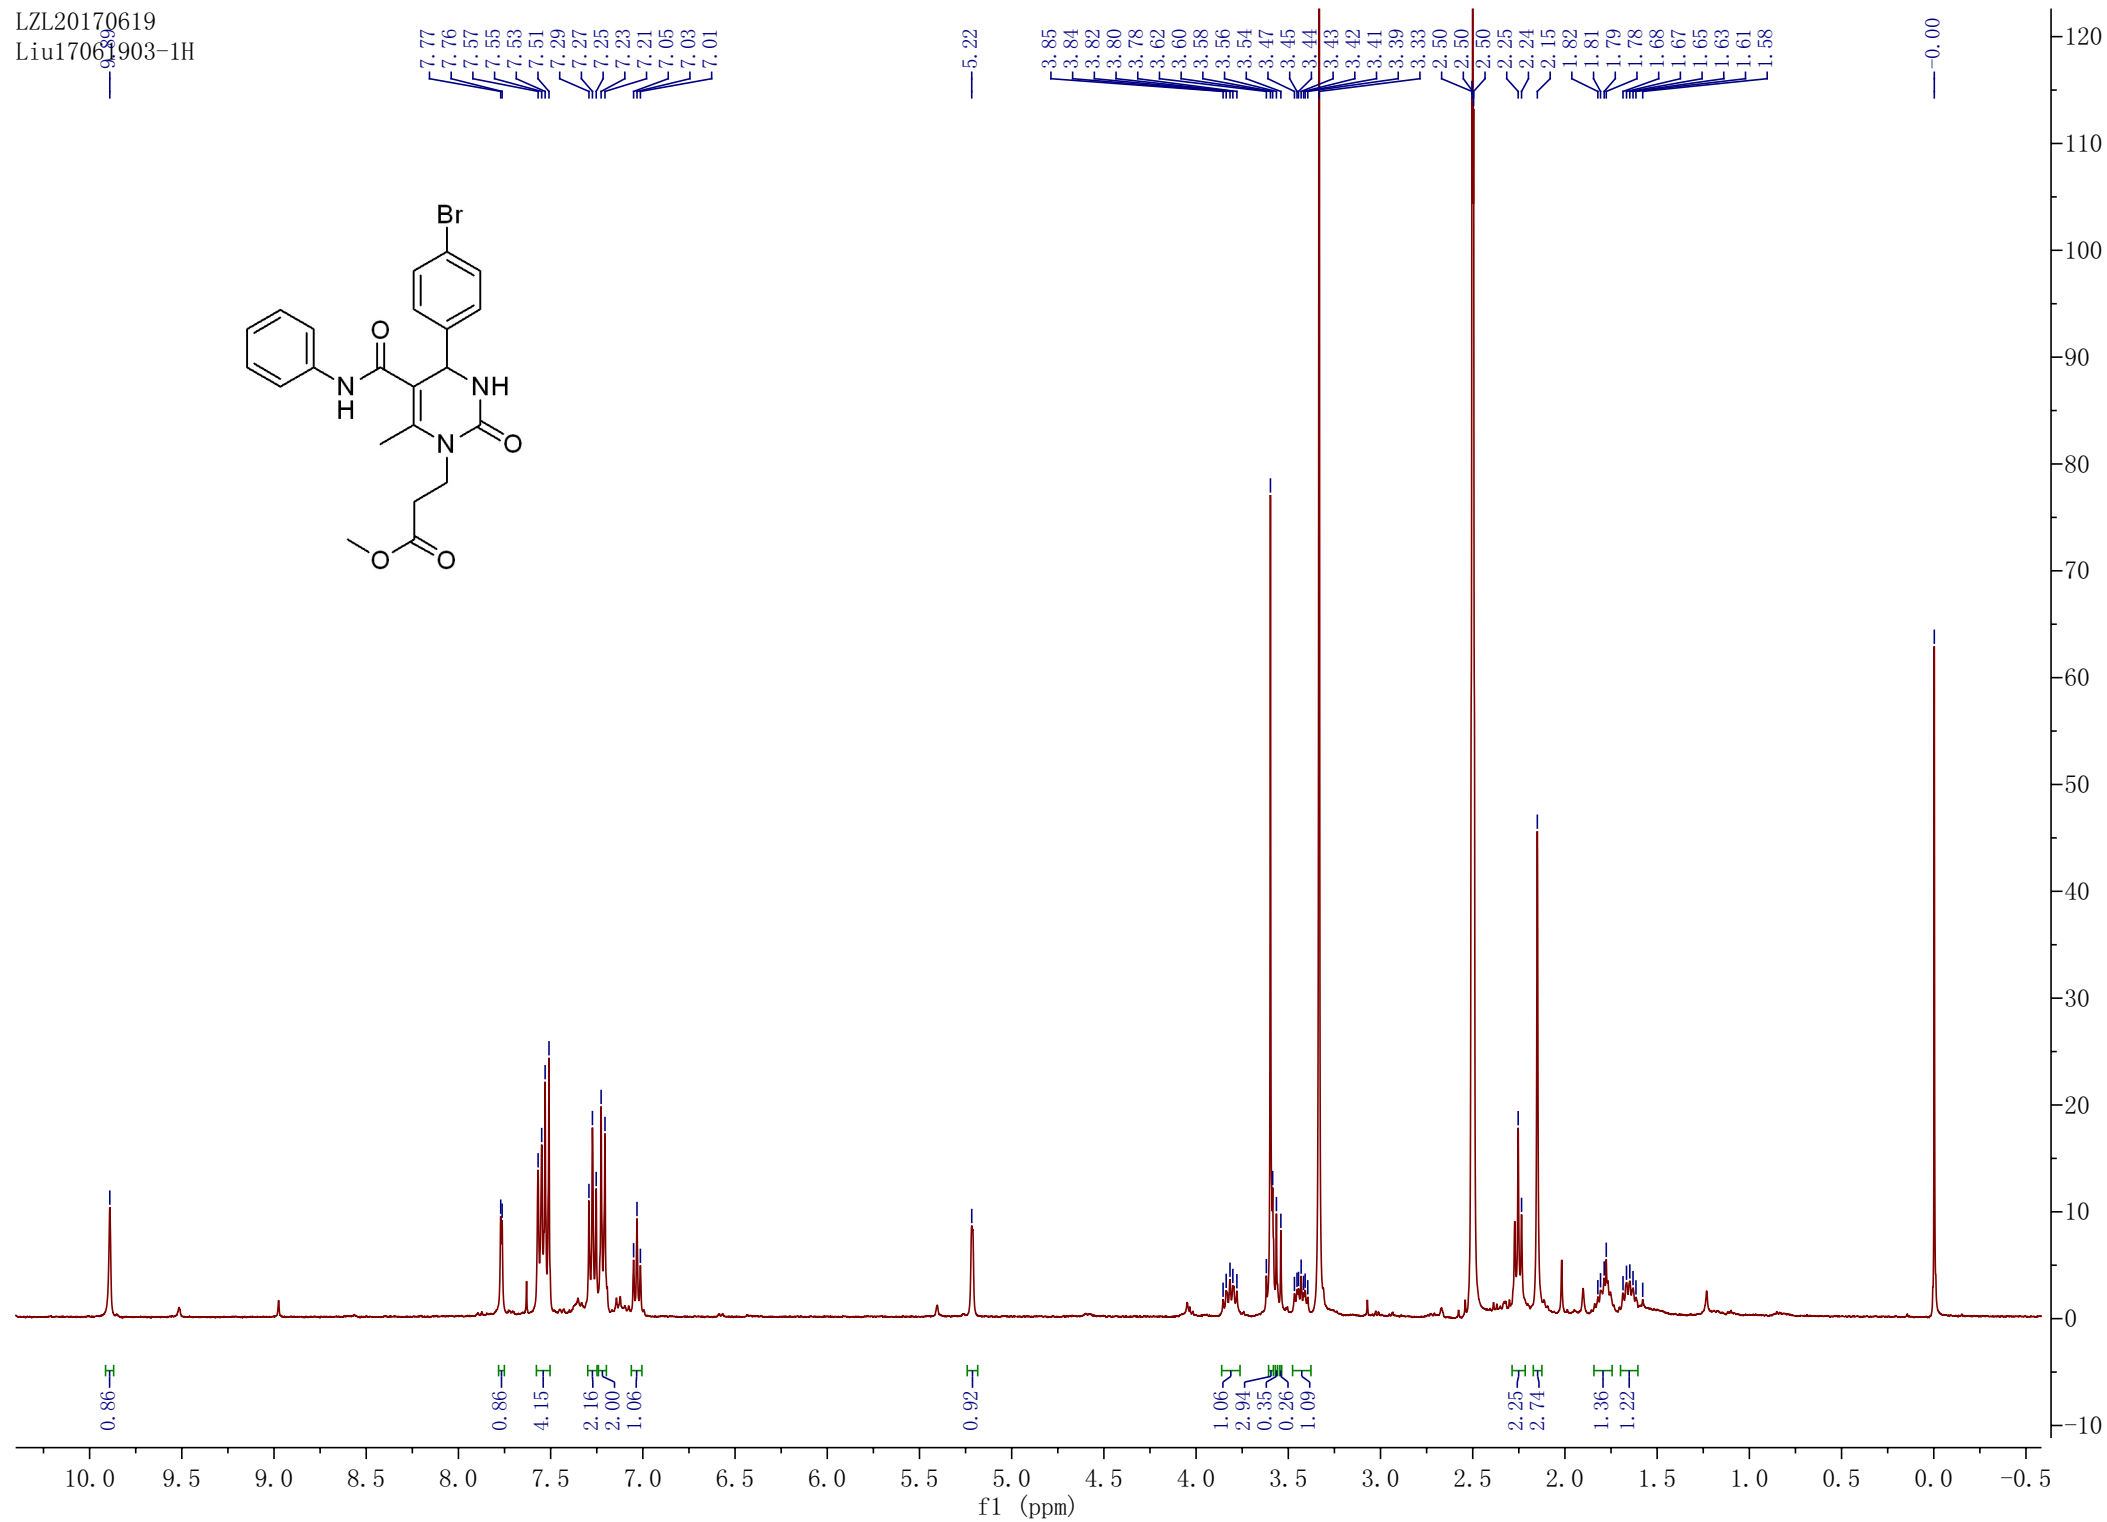

Supplement: s1 [file s1]

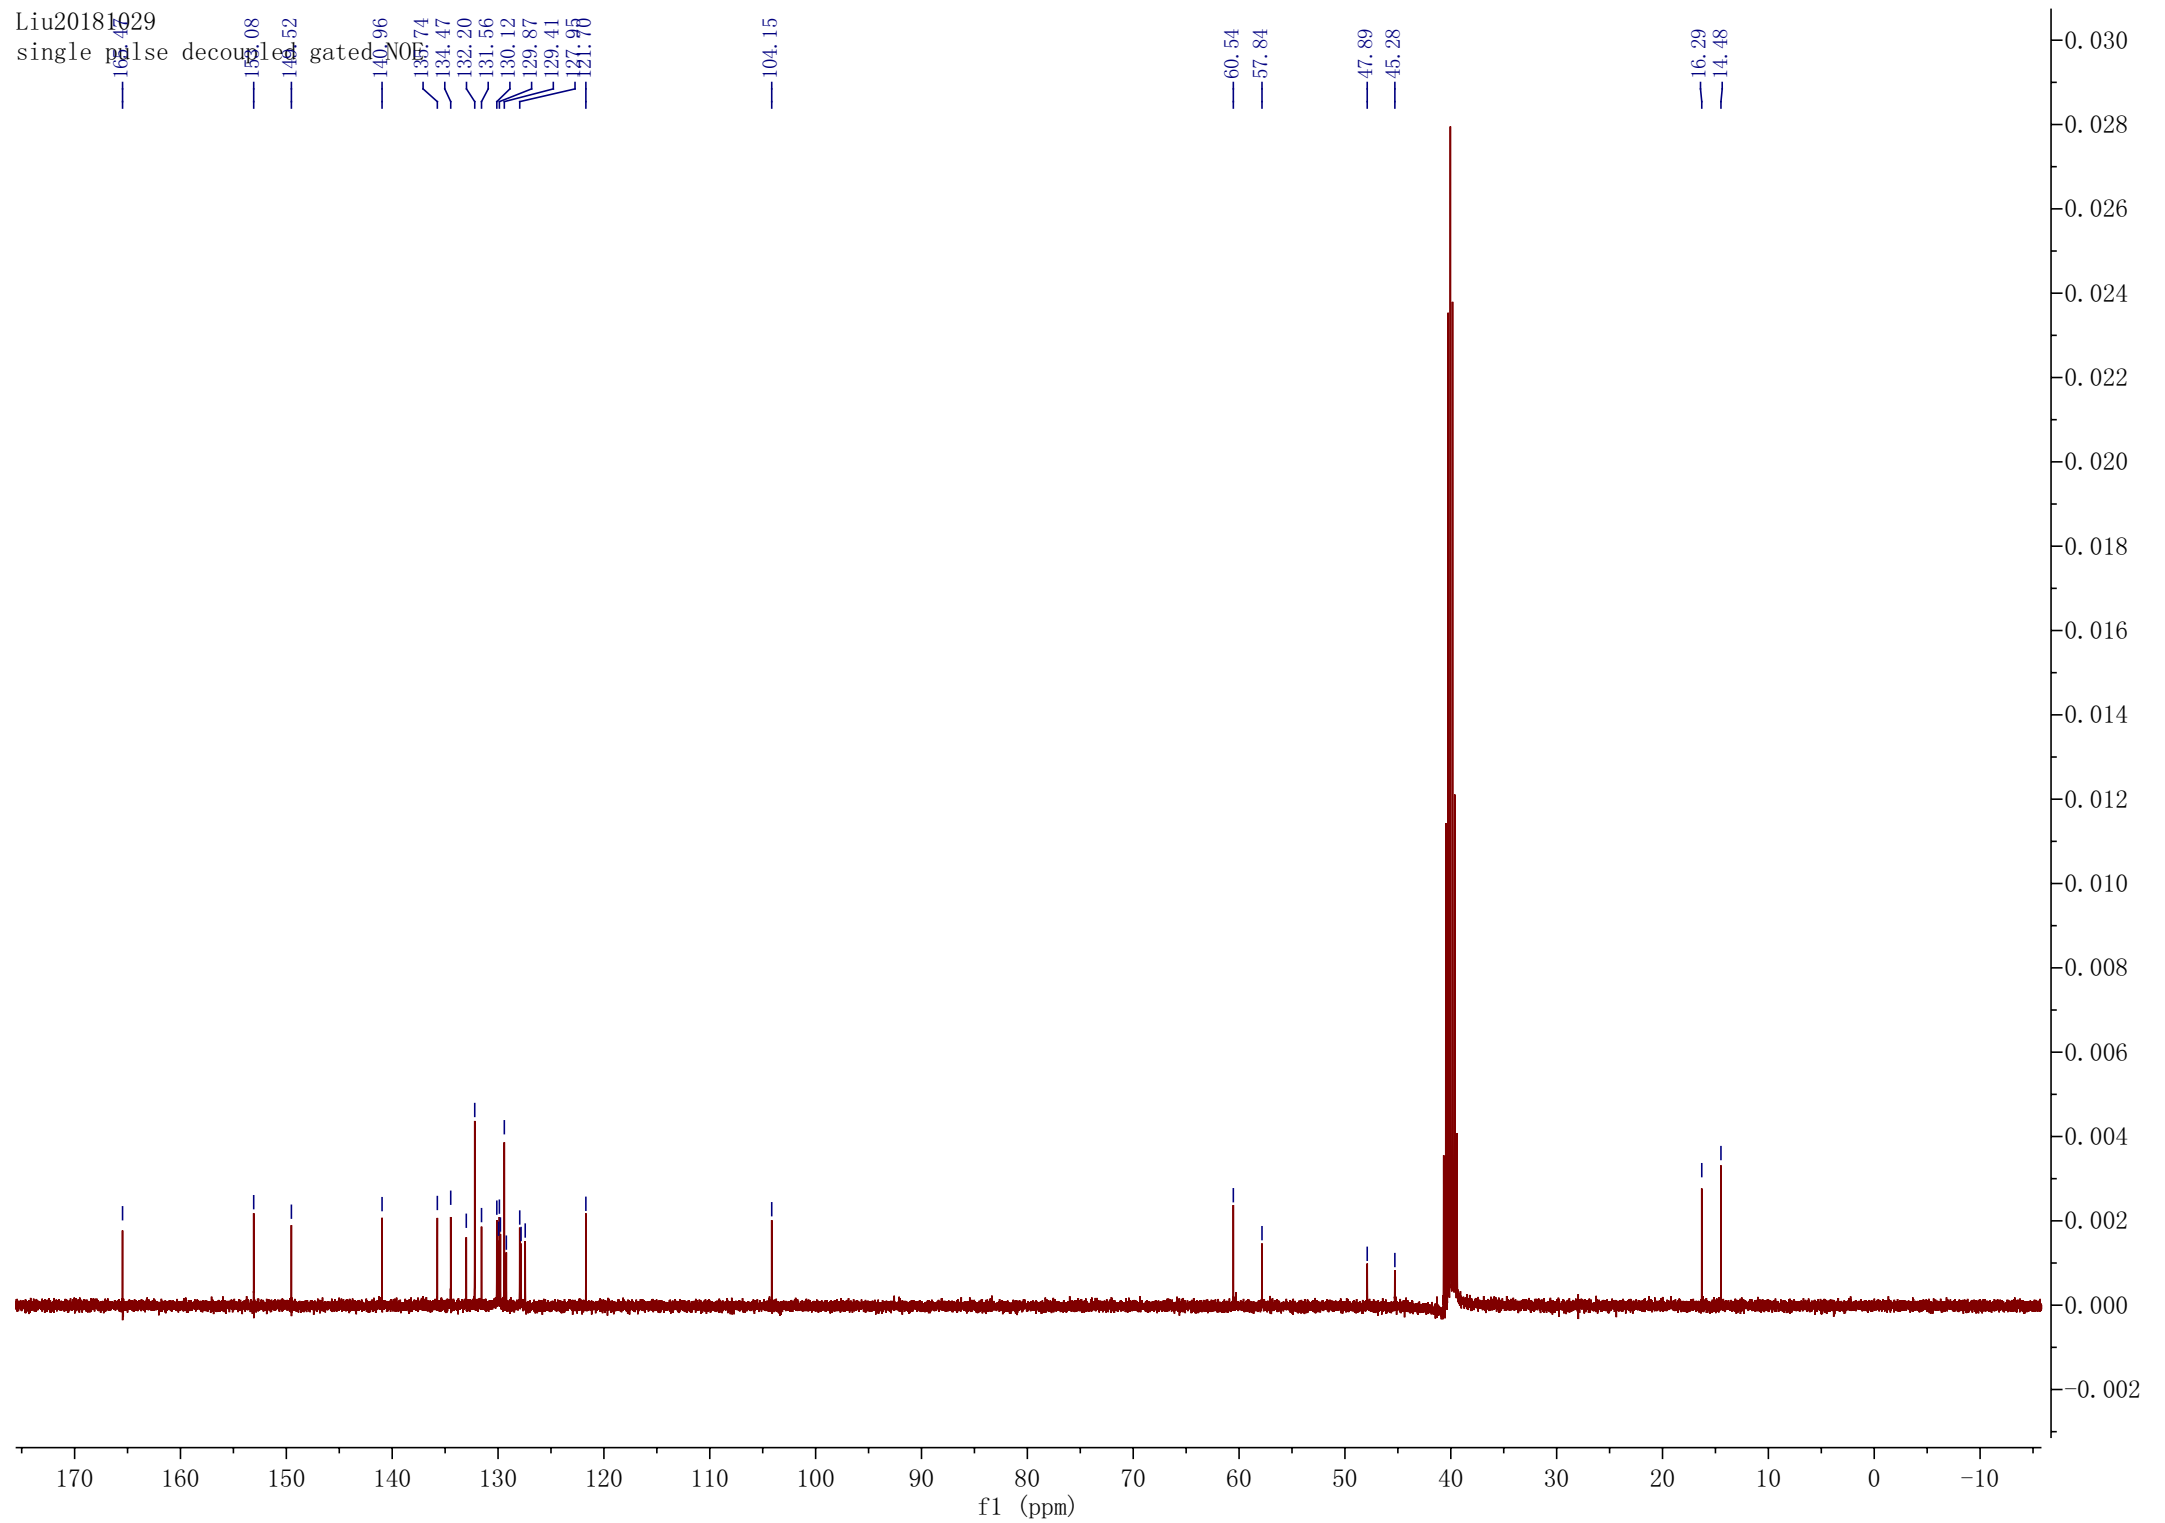

Supplement: s1 [file s1]

LZL  
Liu2017040502-1H

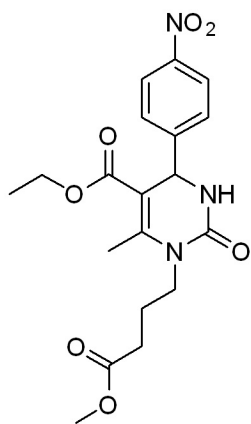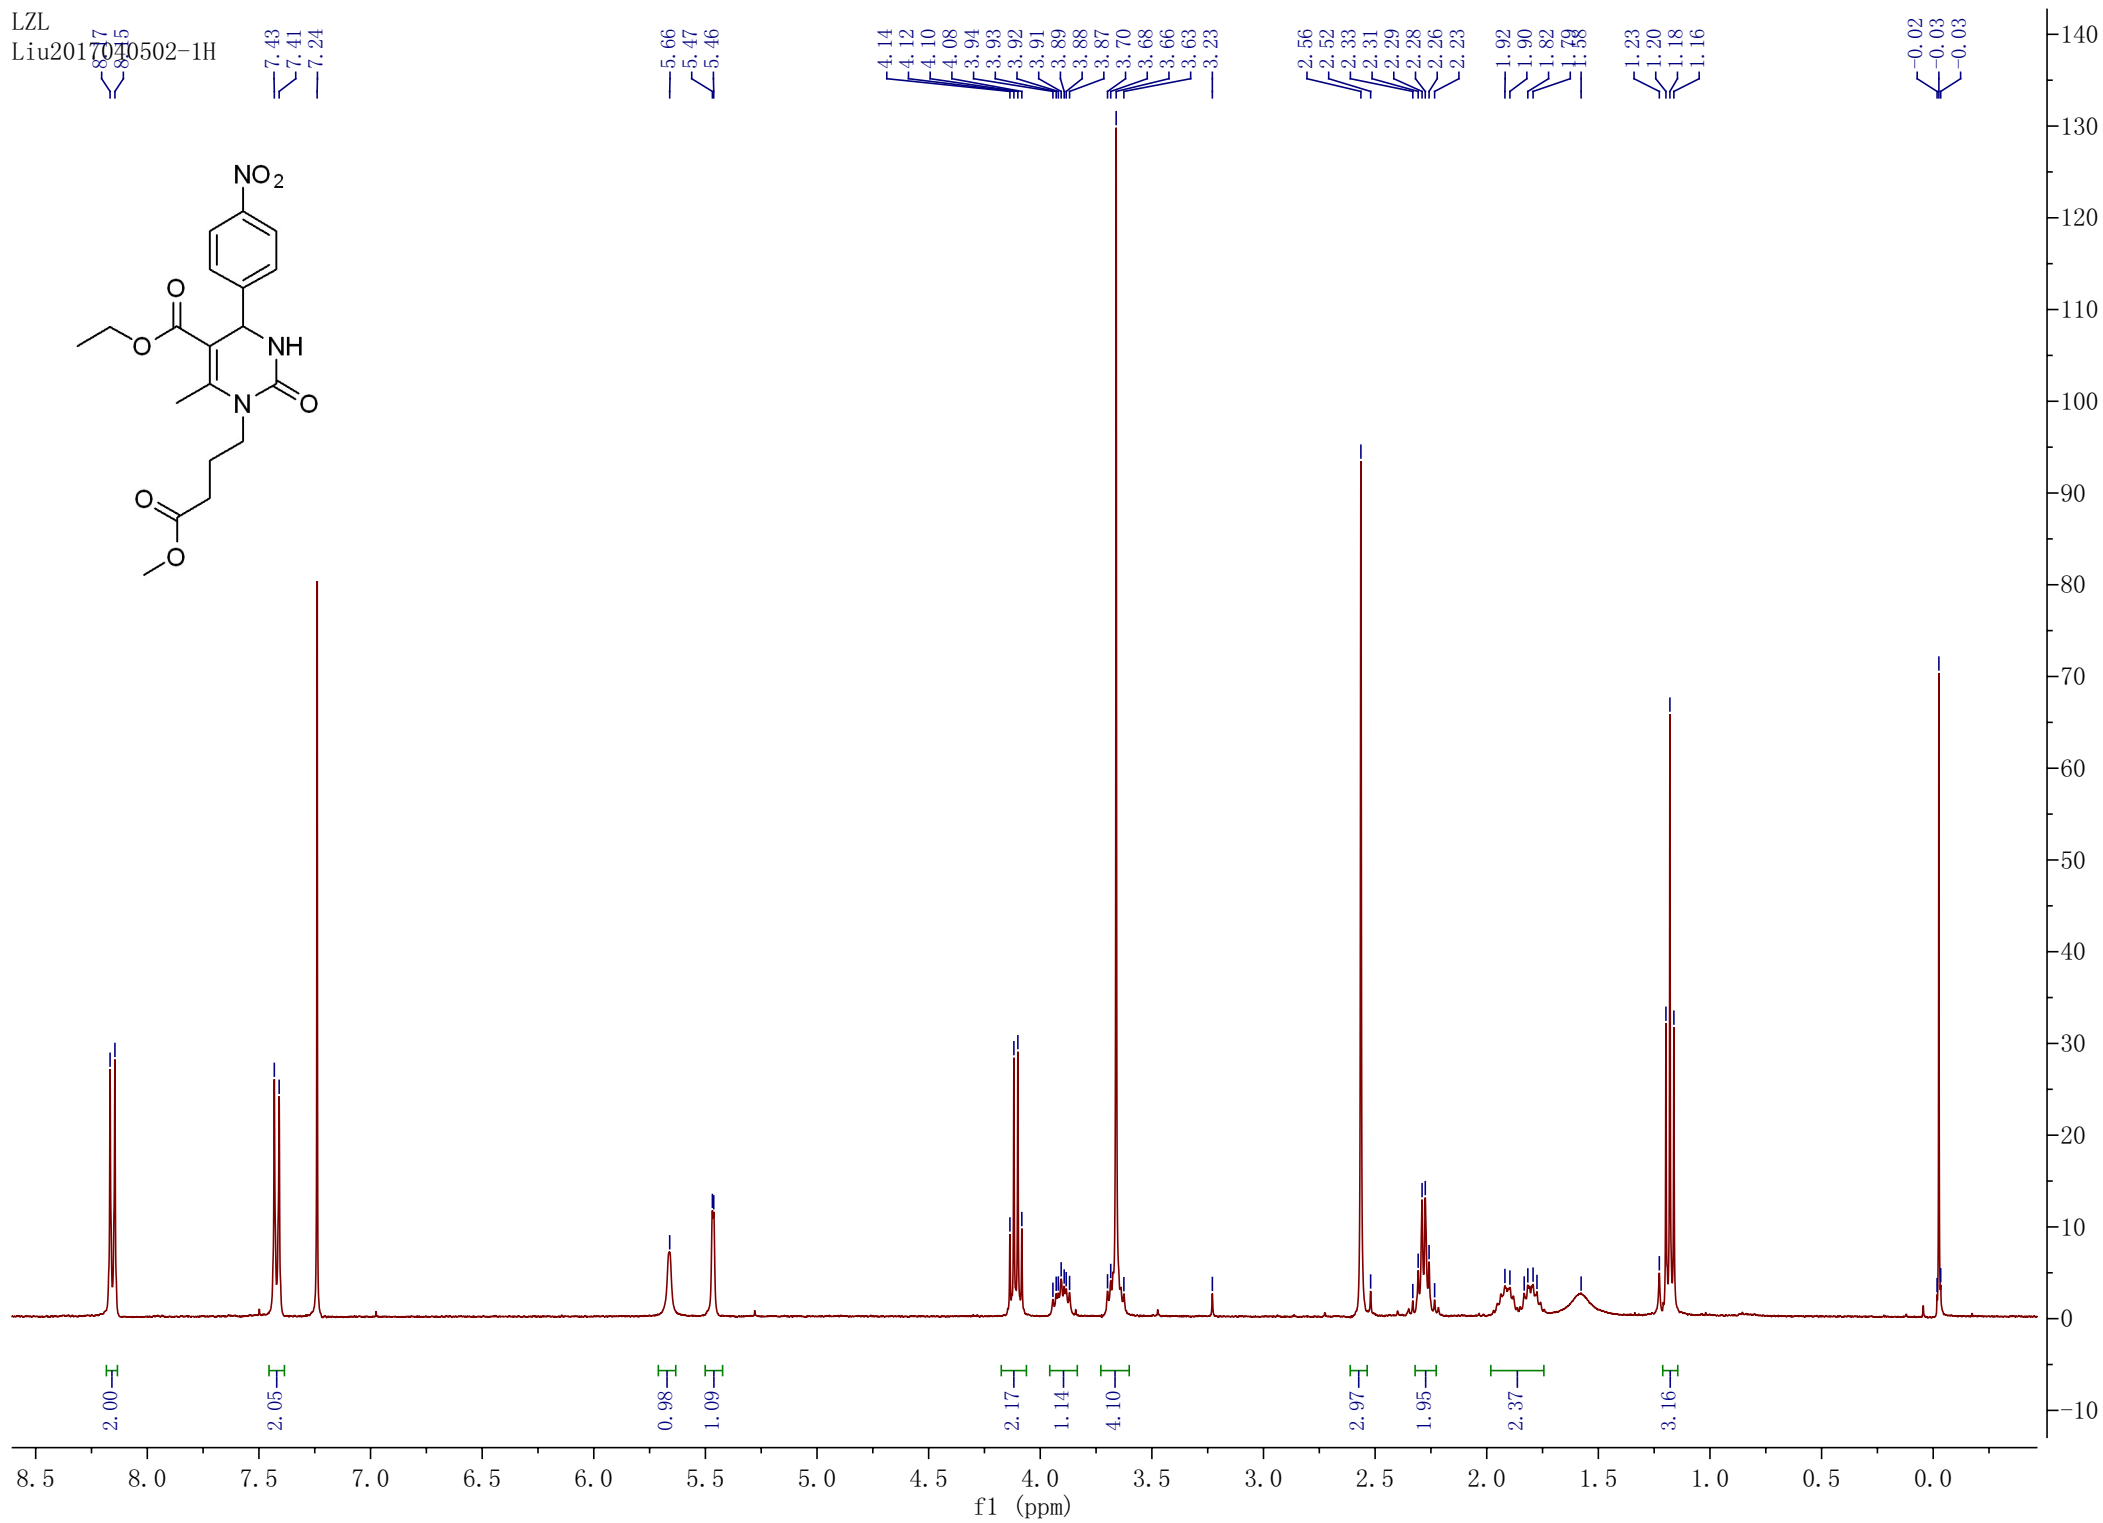

Supplement: s1 [file s1]

LZ-303

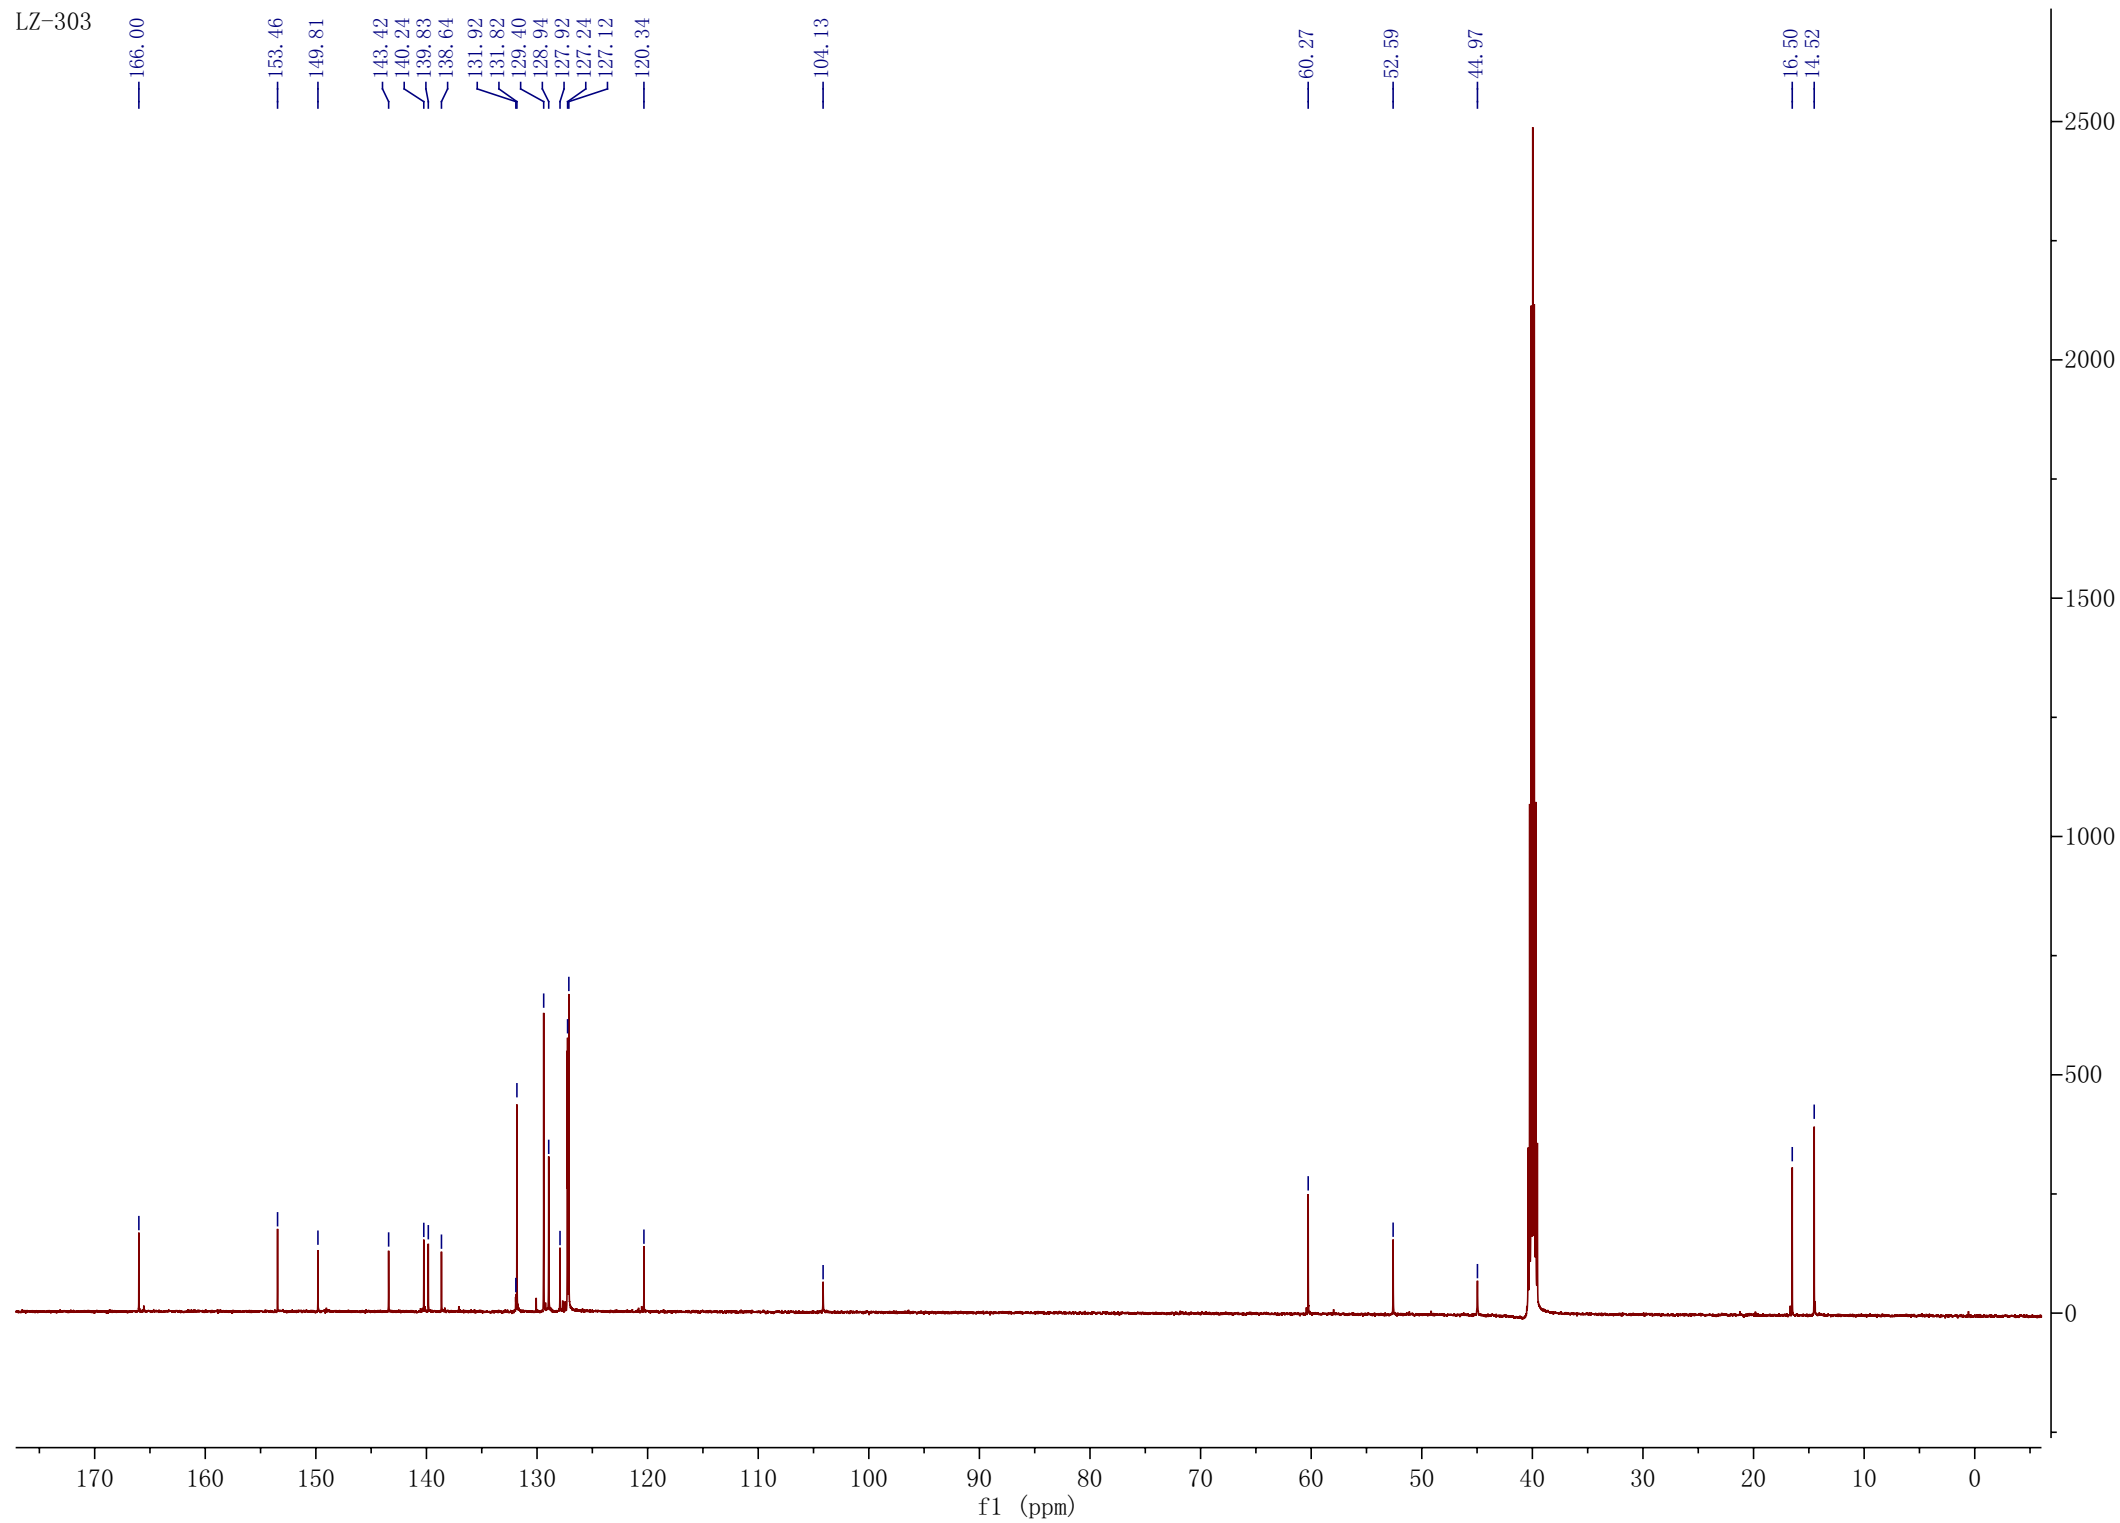

Supplement: s1 [file s1]

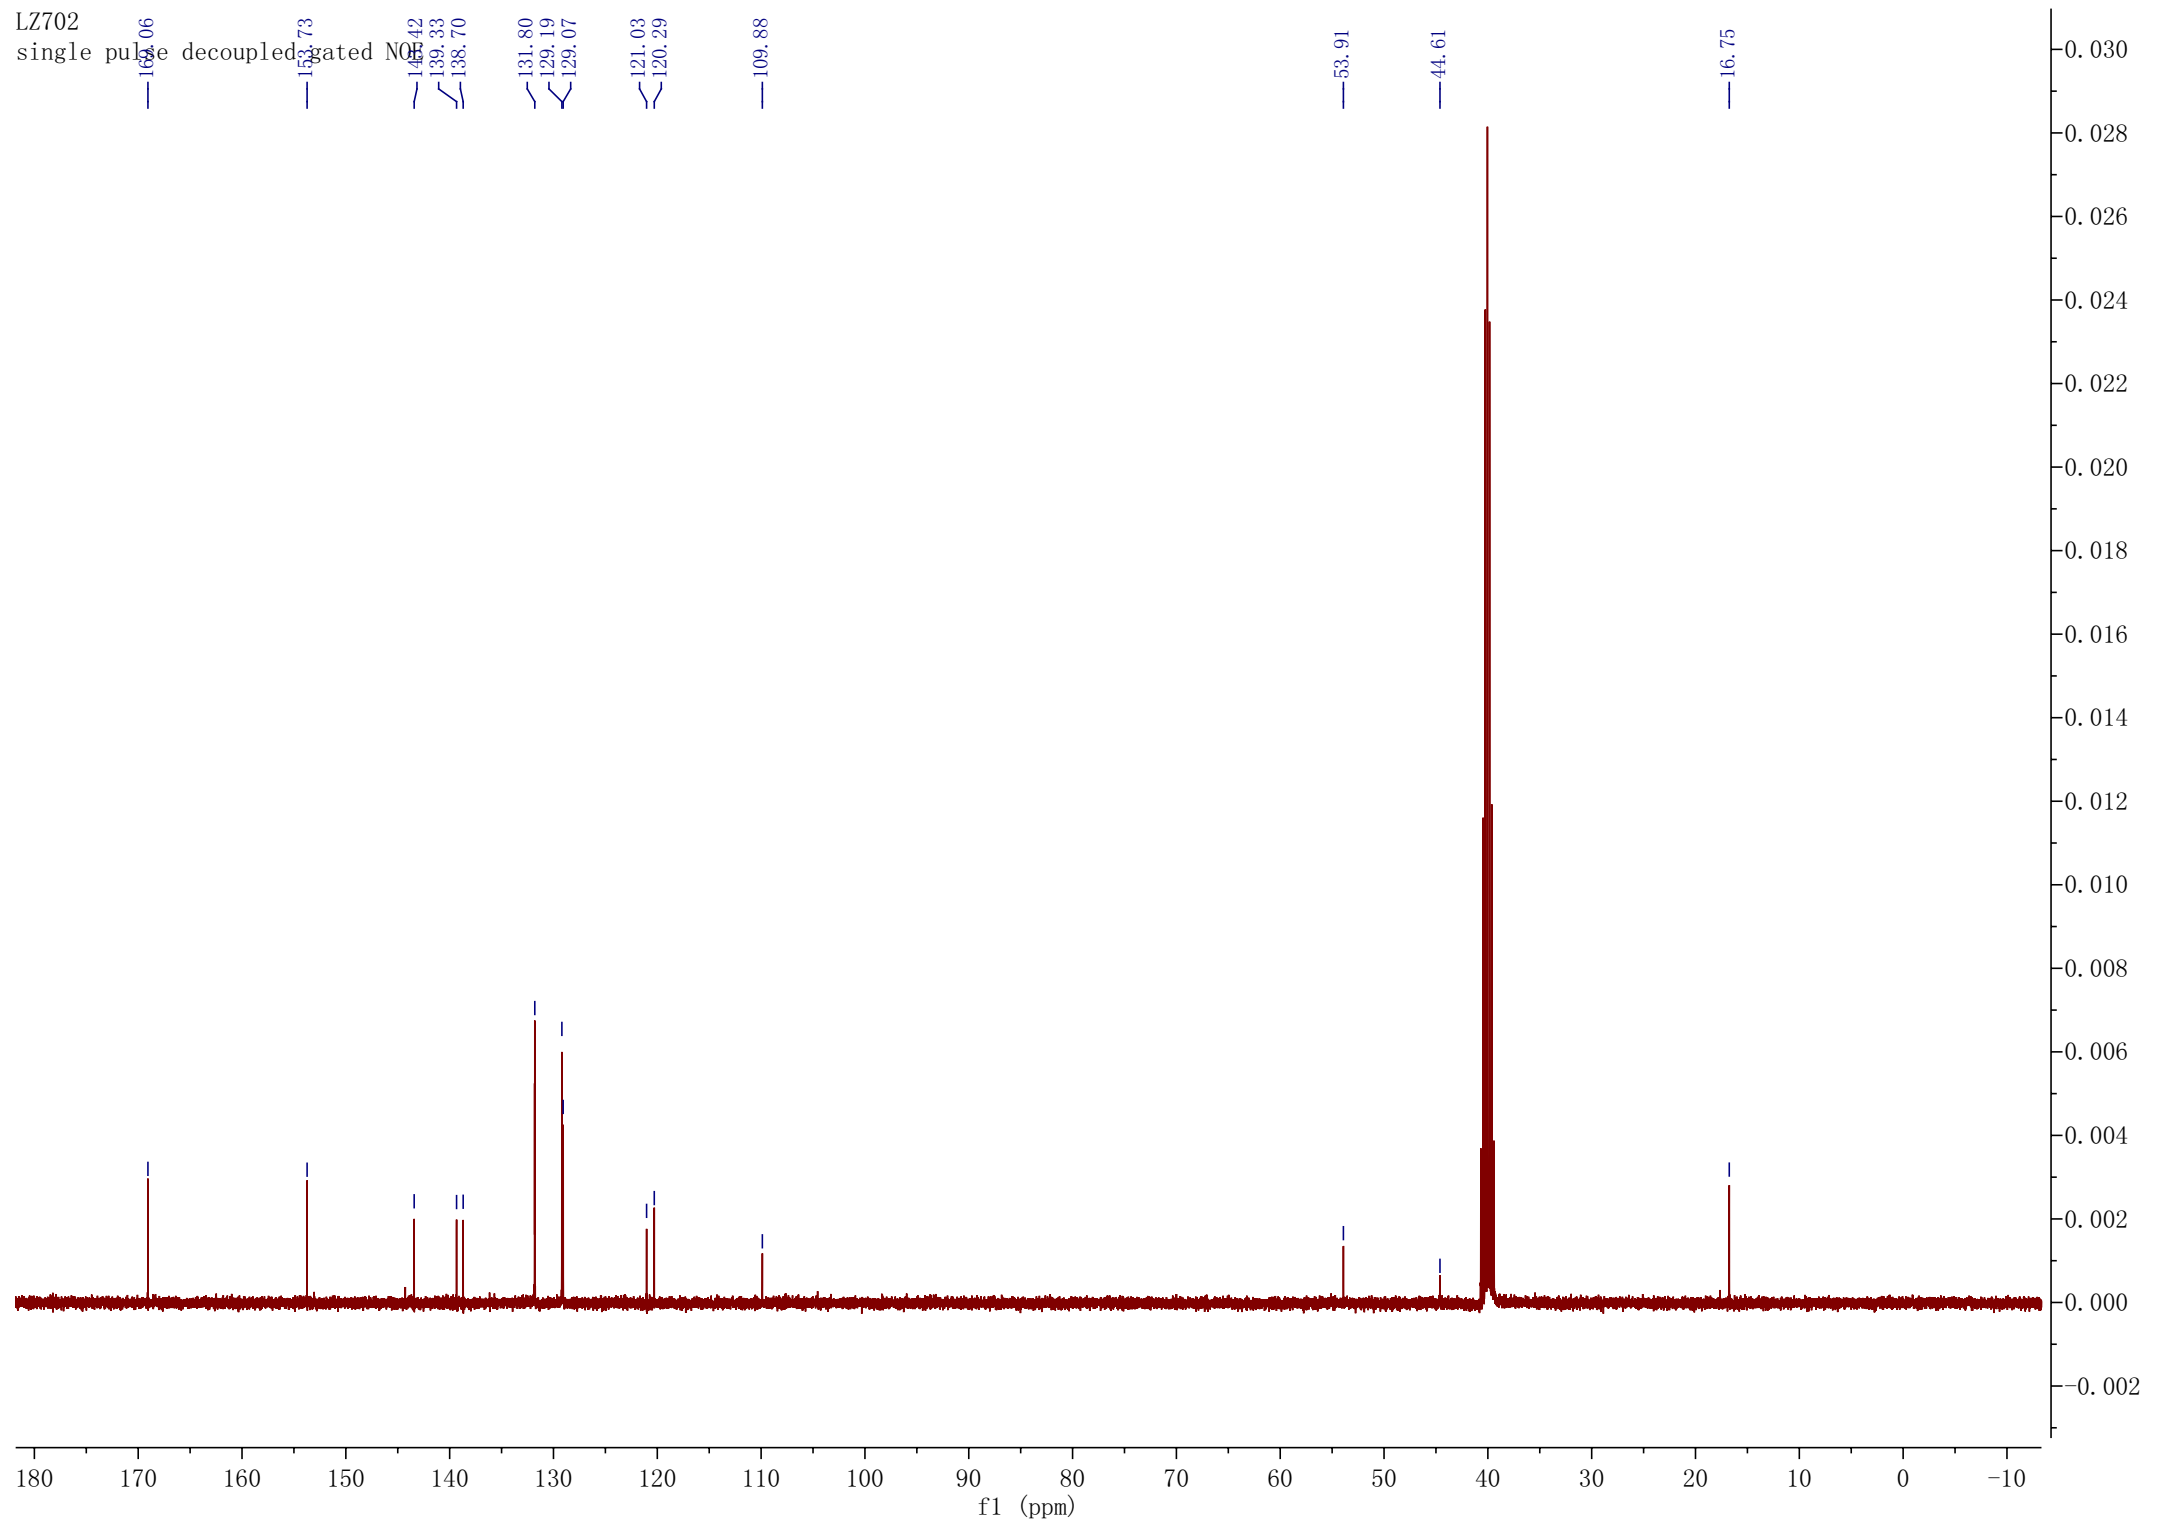

Supplement: s1 [file s1]

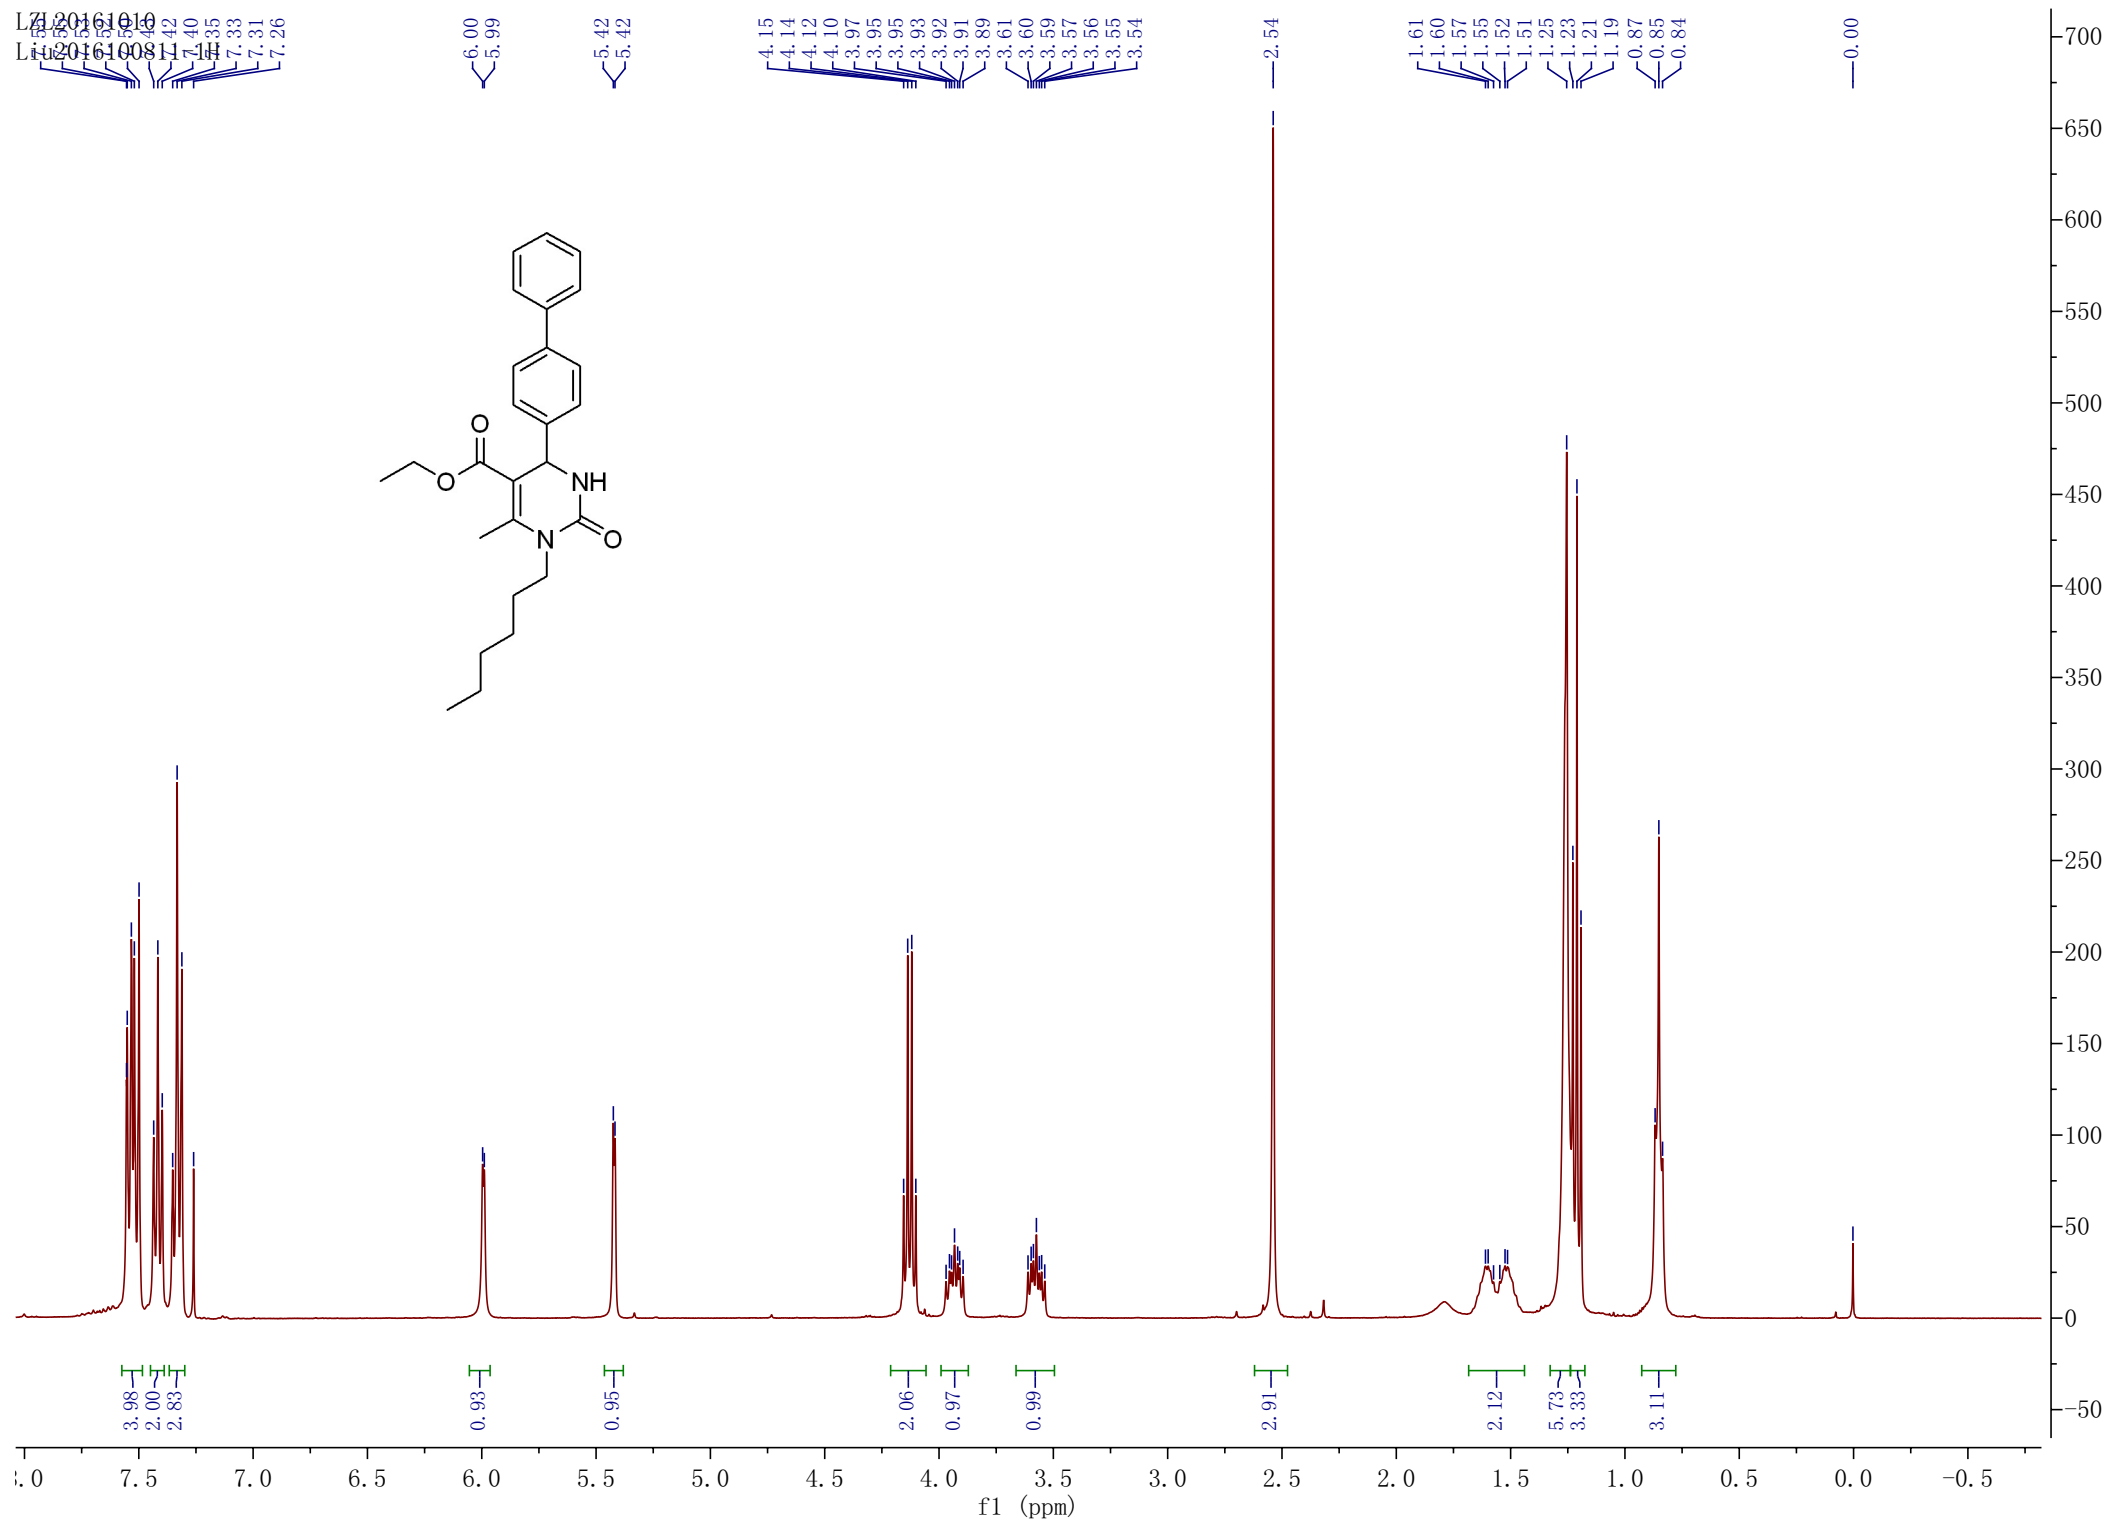

Supplement: s1 [file s1]

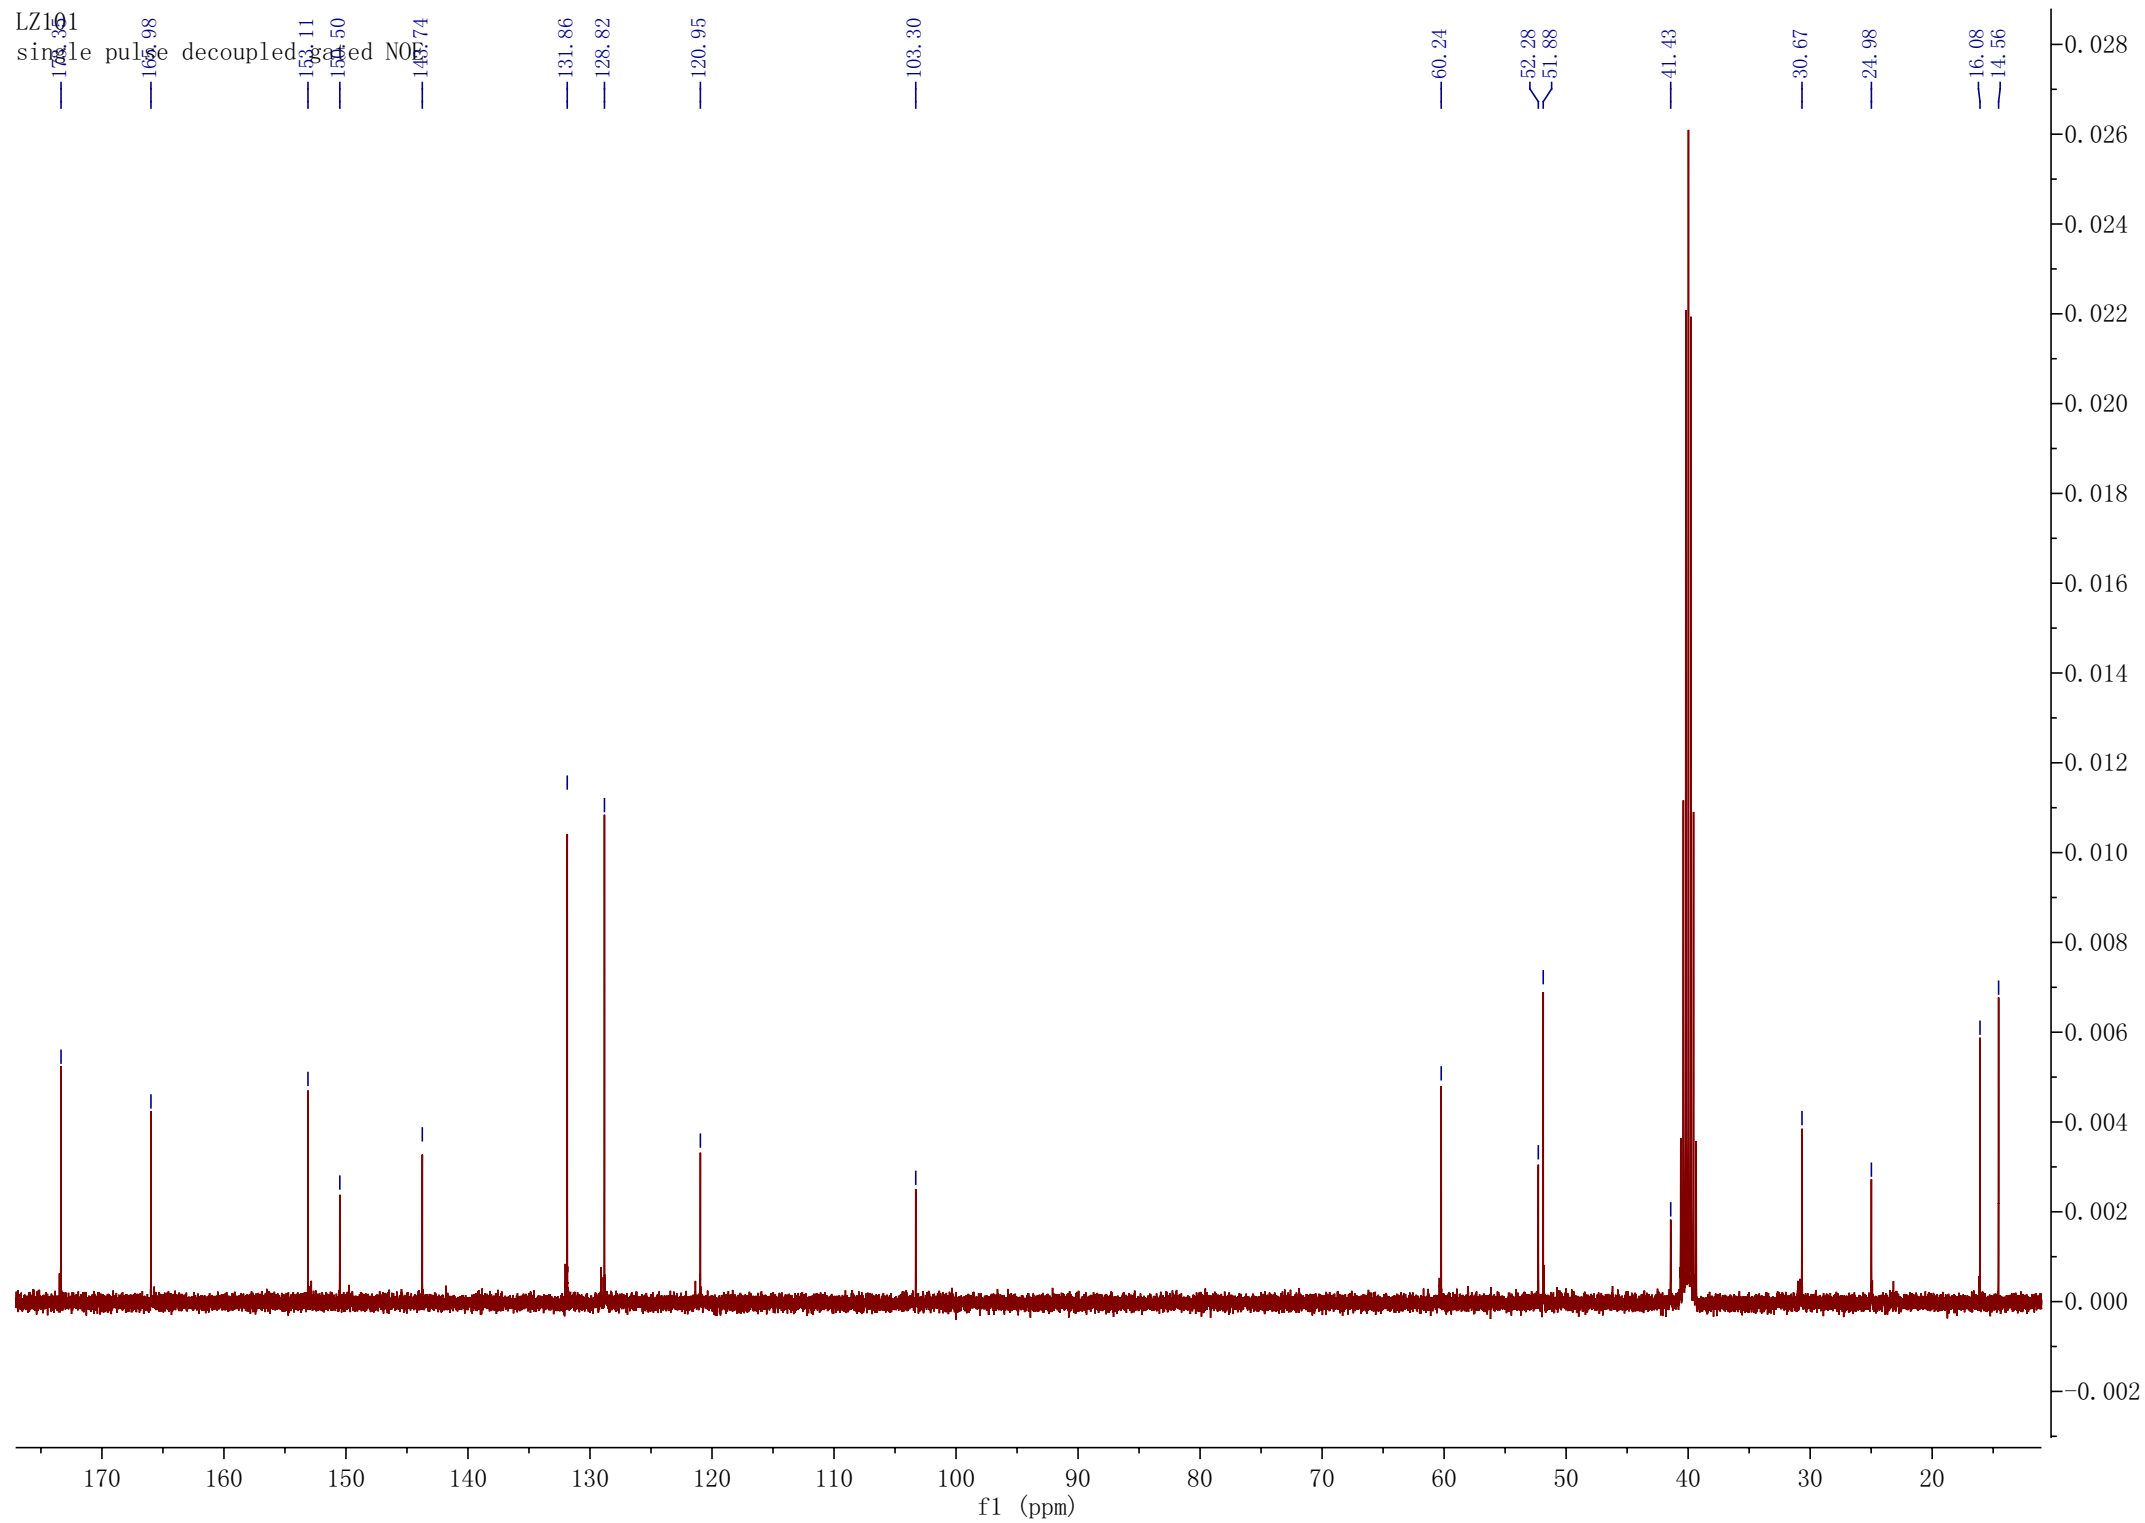

Supplement: s1 [file s1]

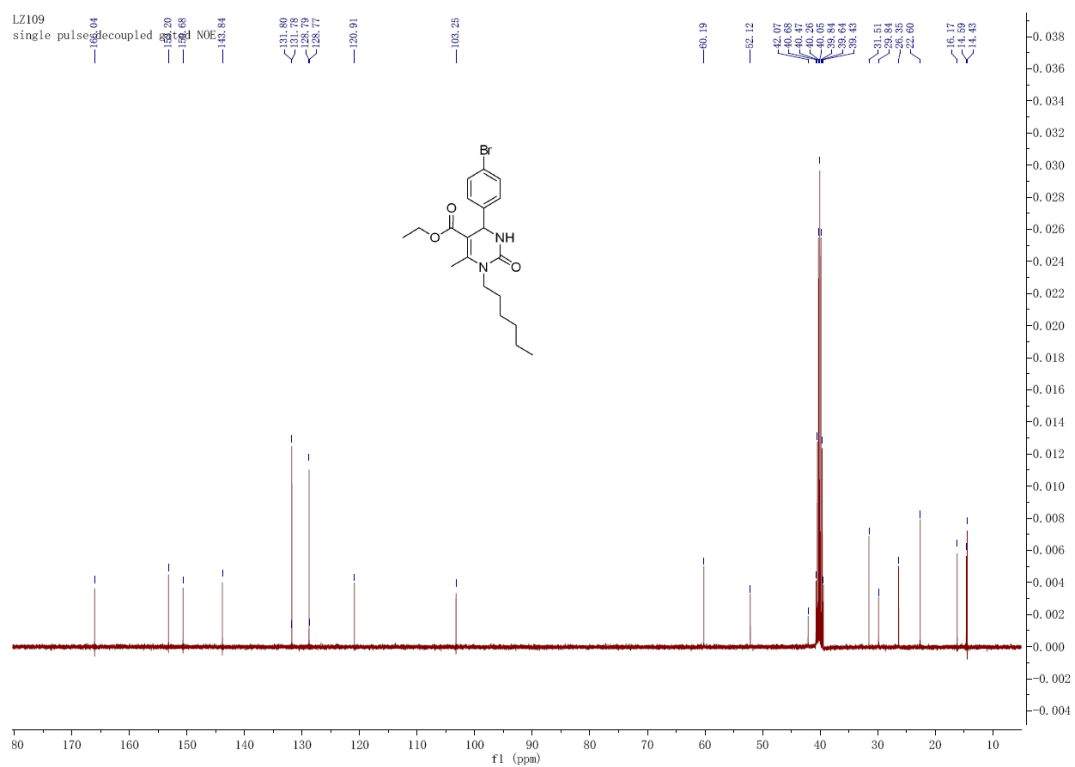

Supplement: s1 [file s1]

LZ-302

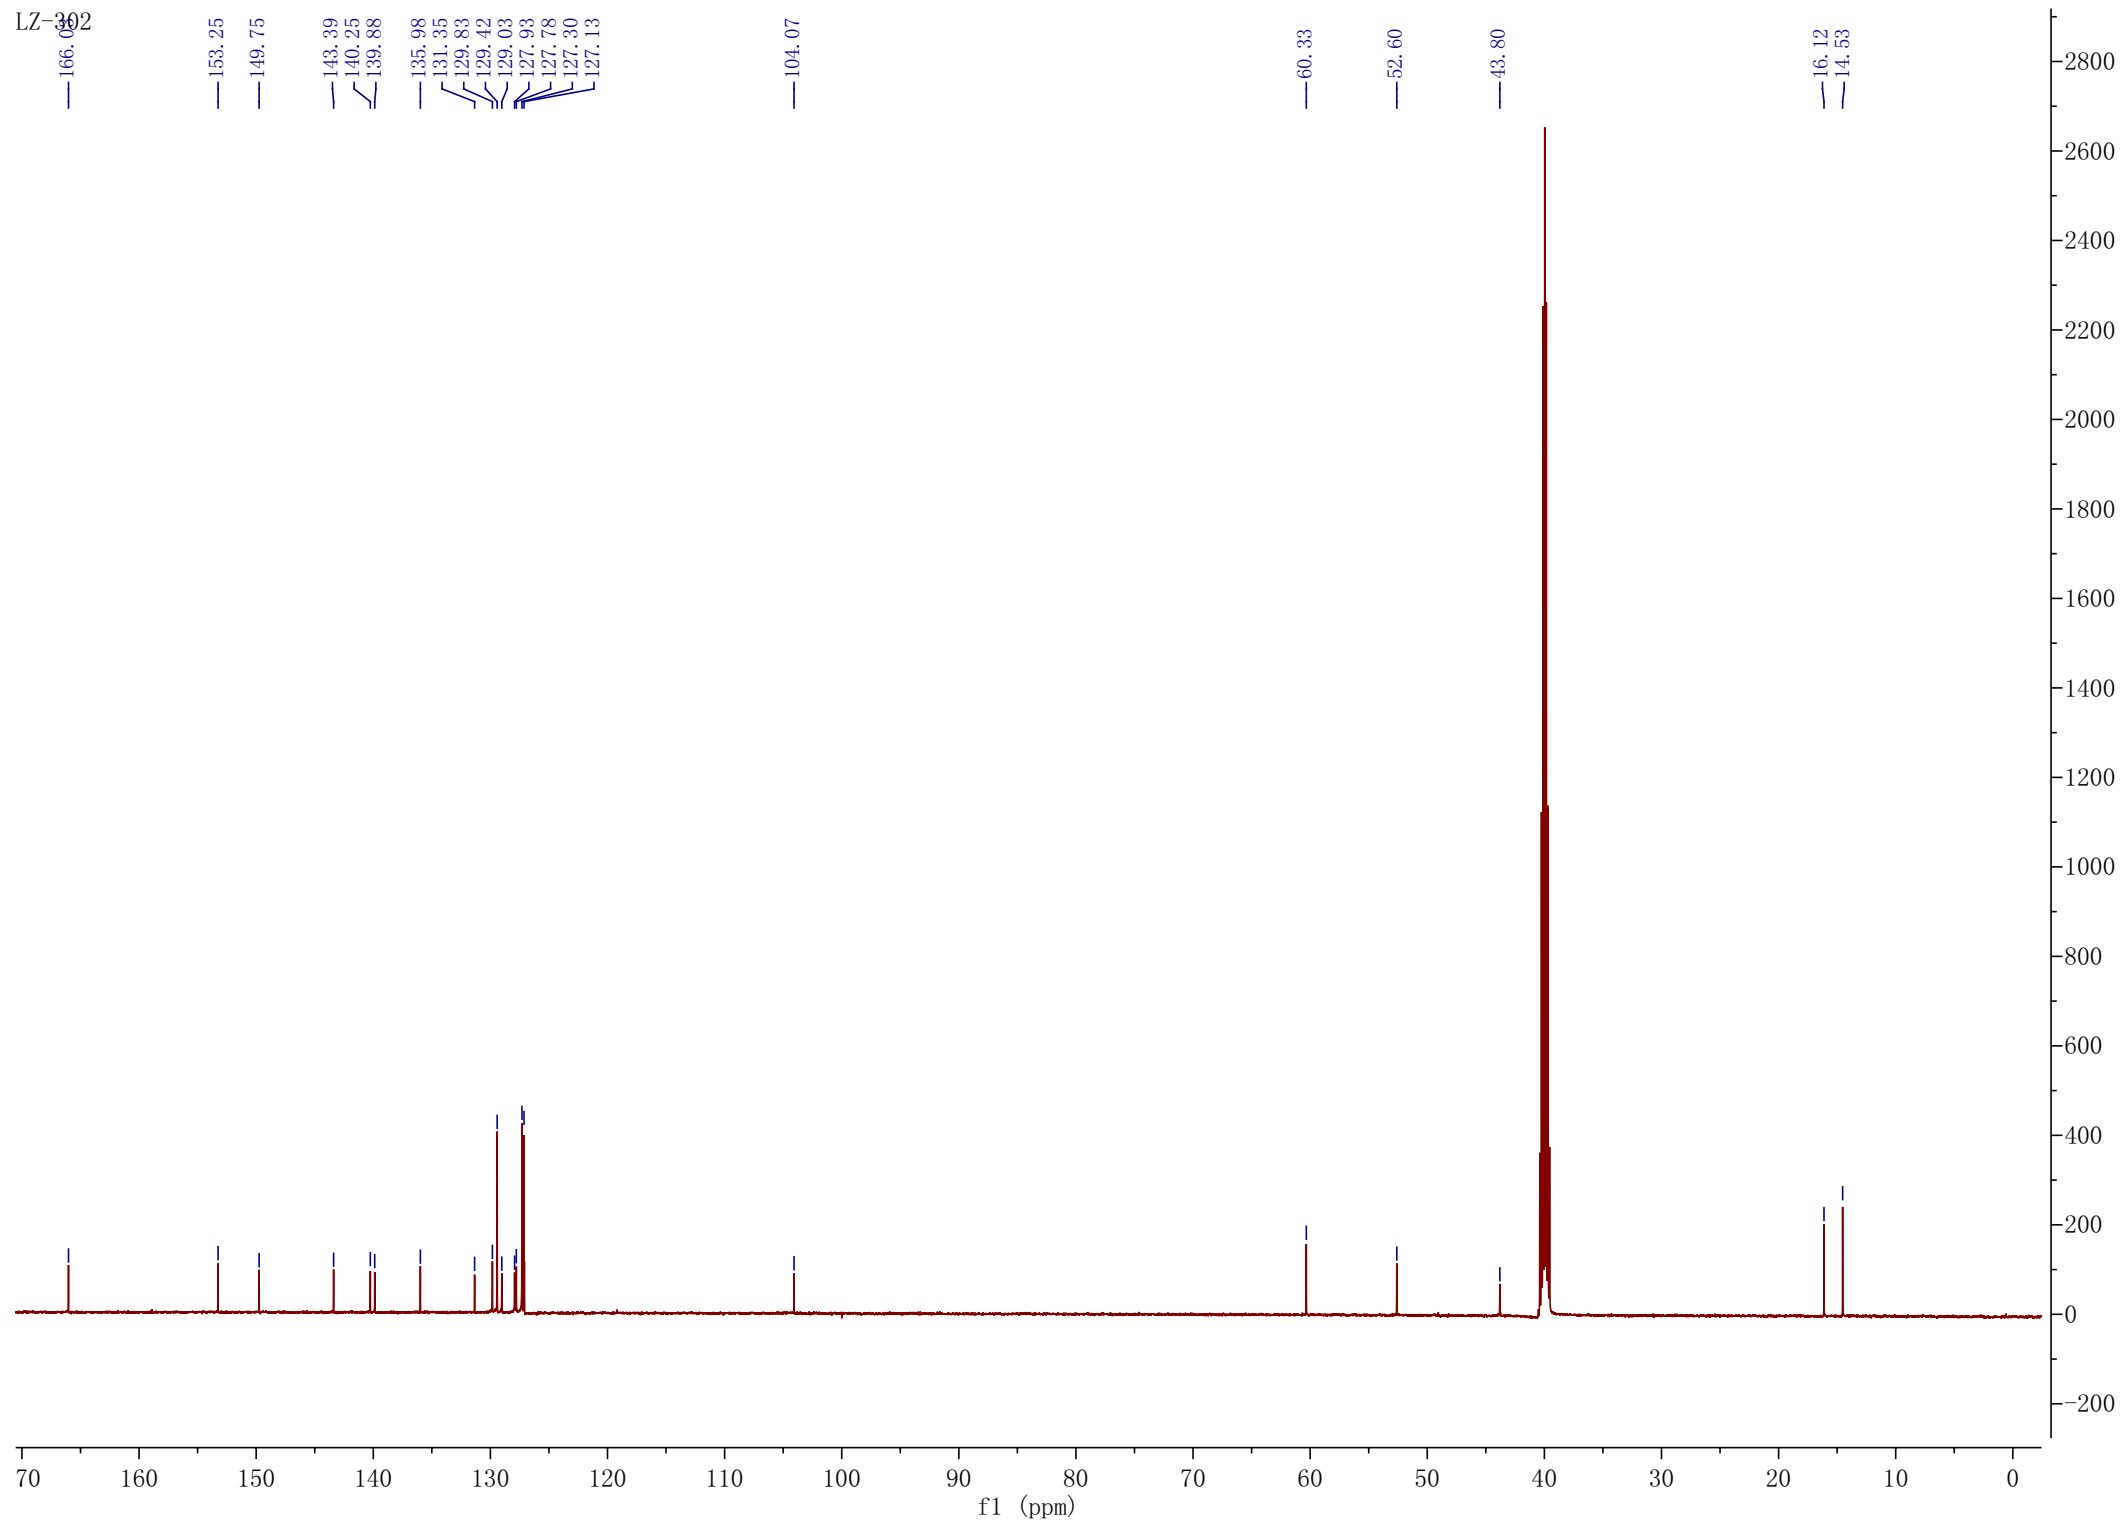

Supplement: s1 [file s1]

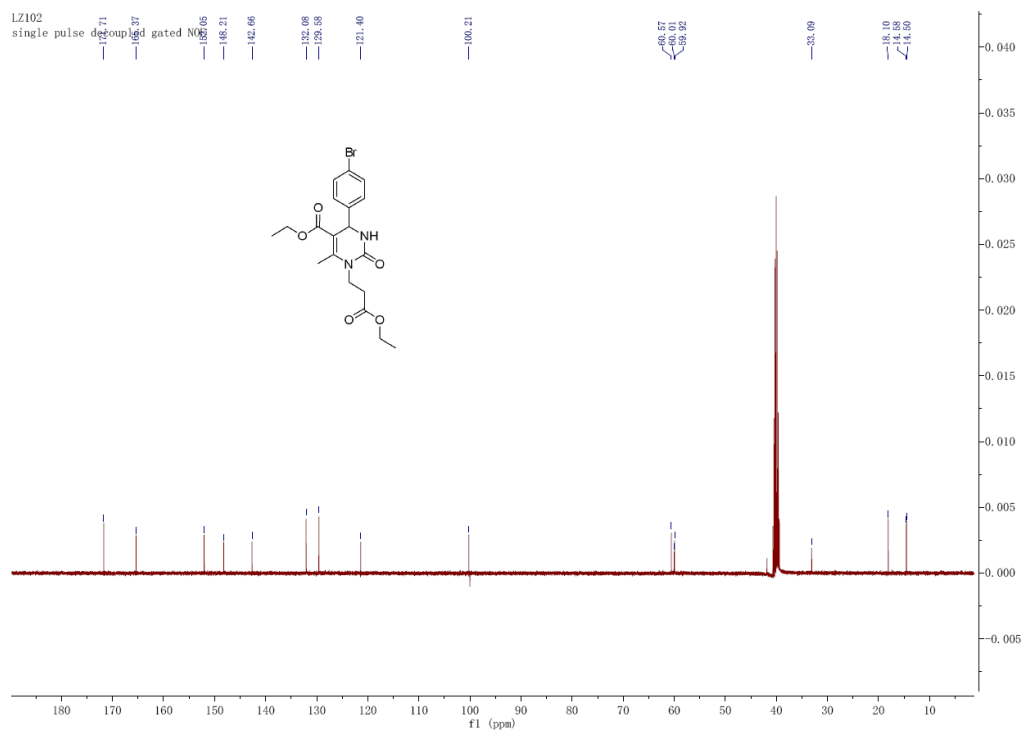

Supplement: s1 [file s1]

LZL20161010  
Fig2016100810-1H

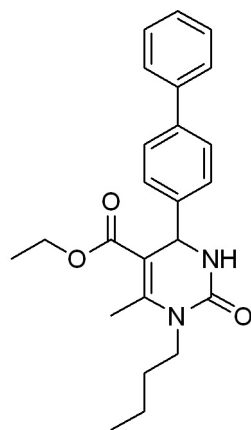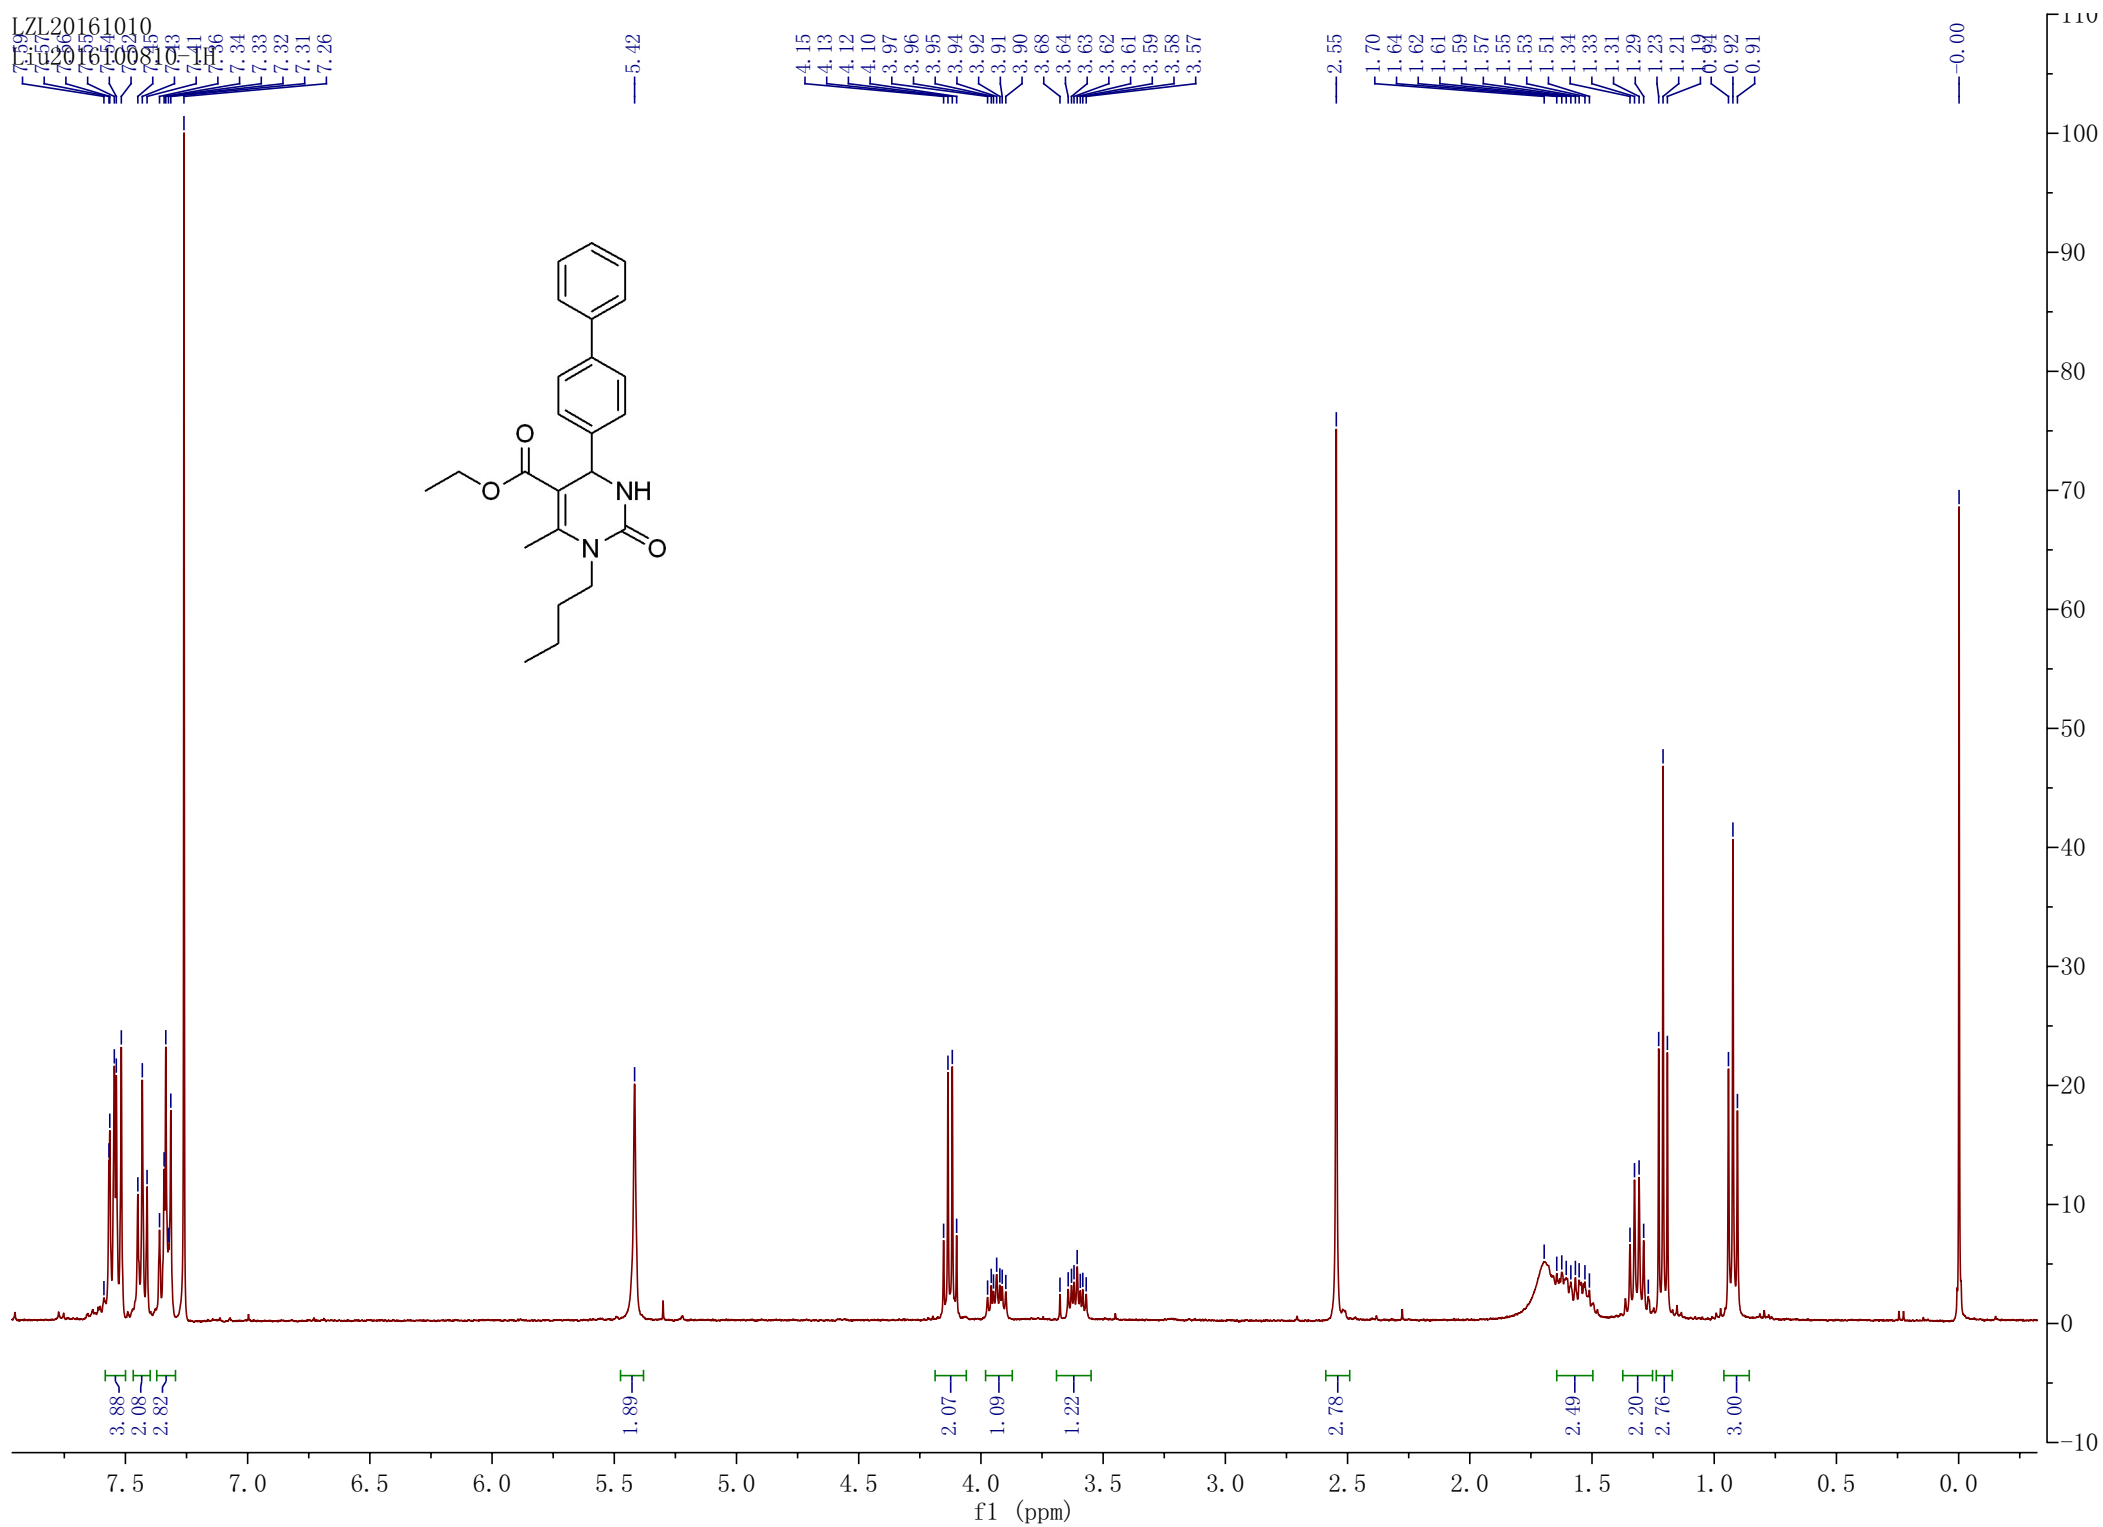

Supplement: s1 [file s1]

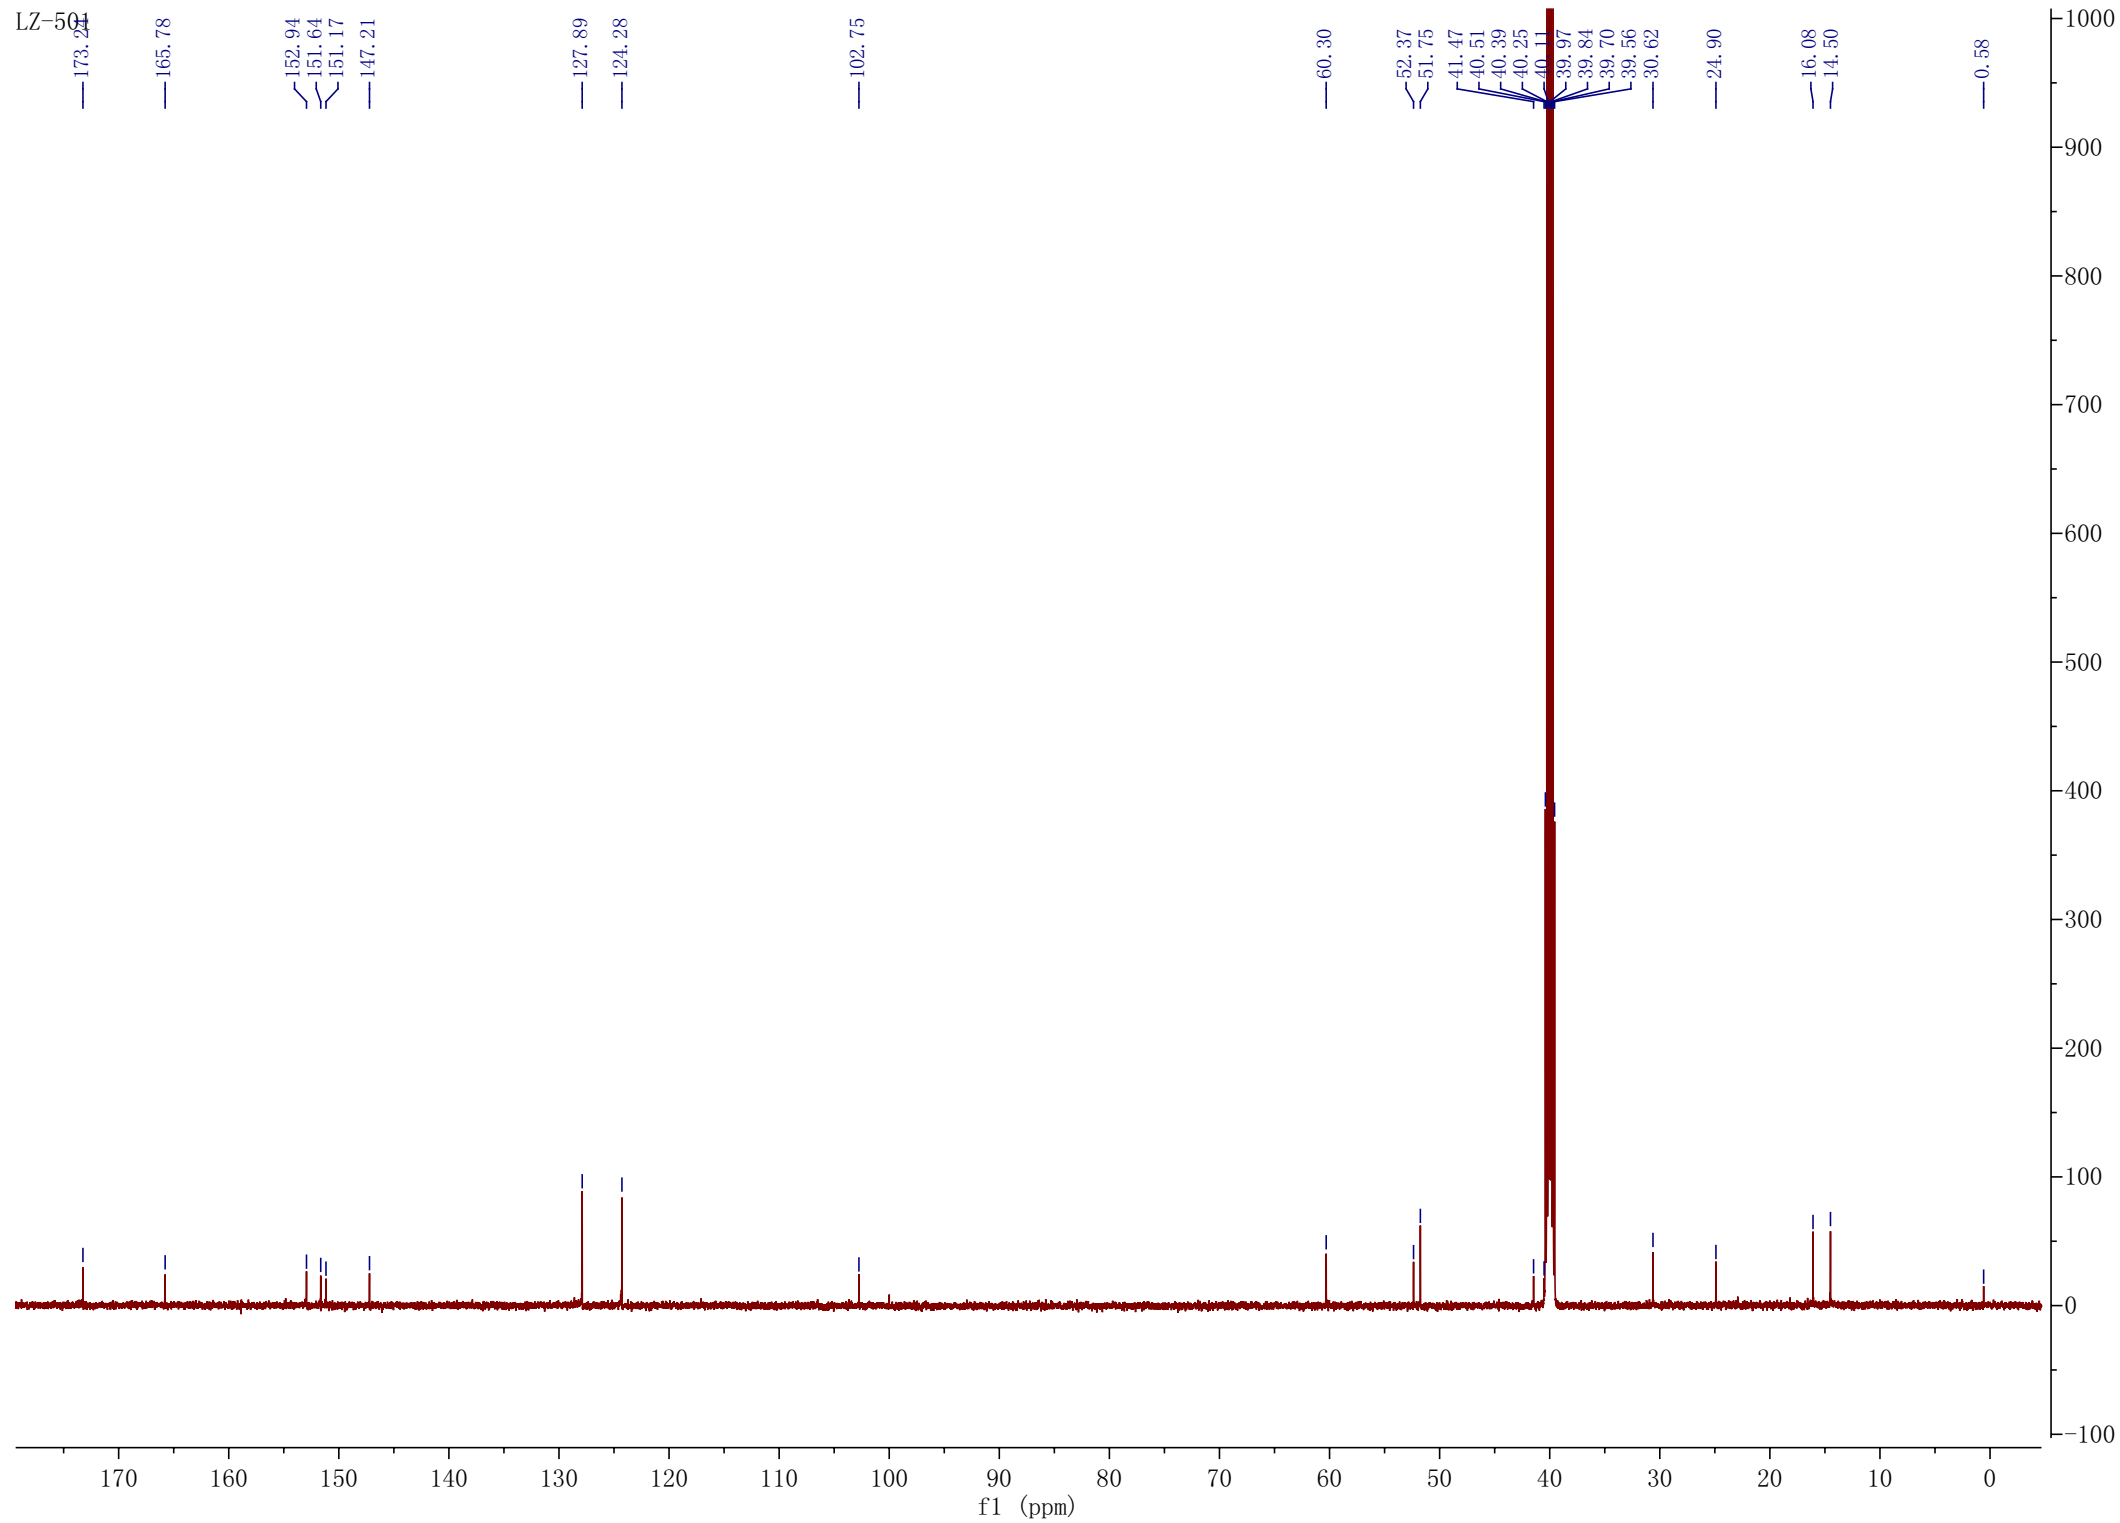

Supplement: s1 [file s1]

LZL20160425  
Liu2016042503-1H

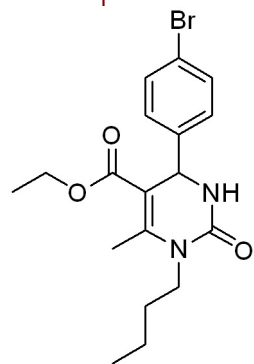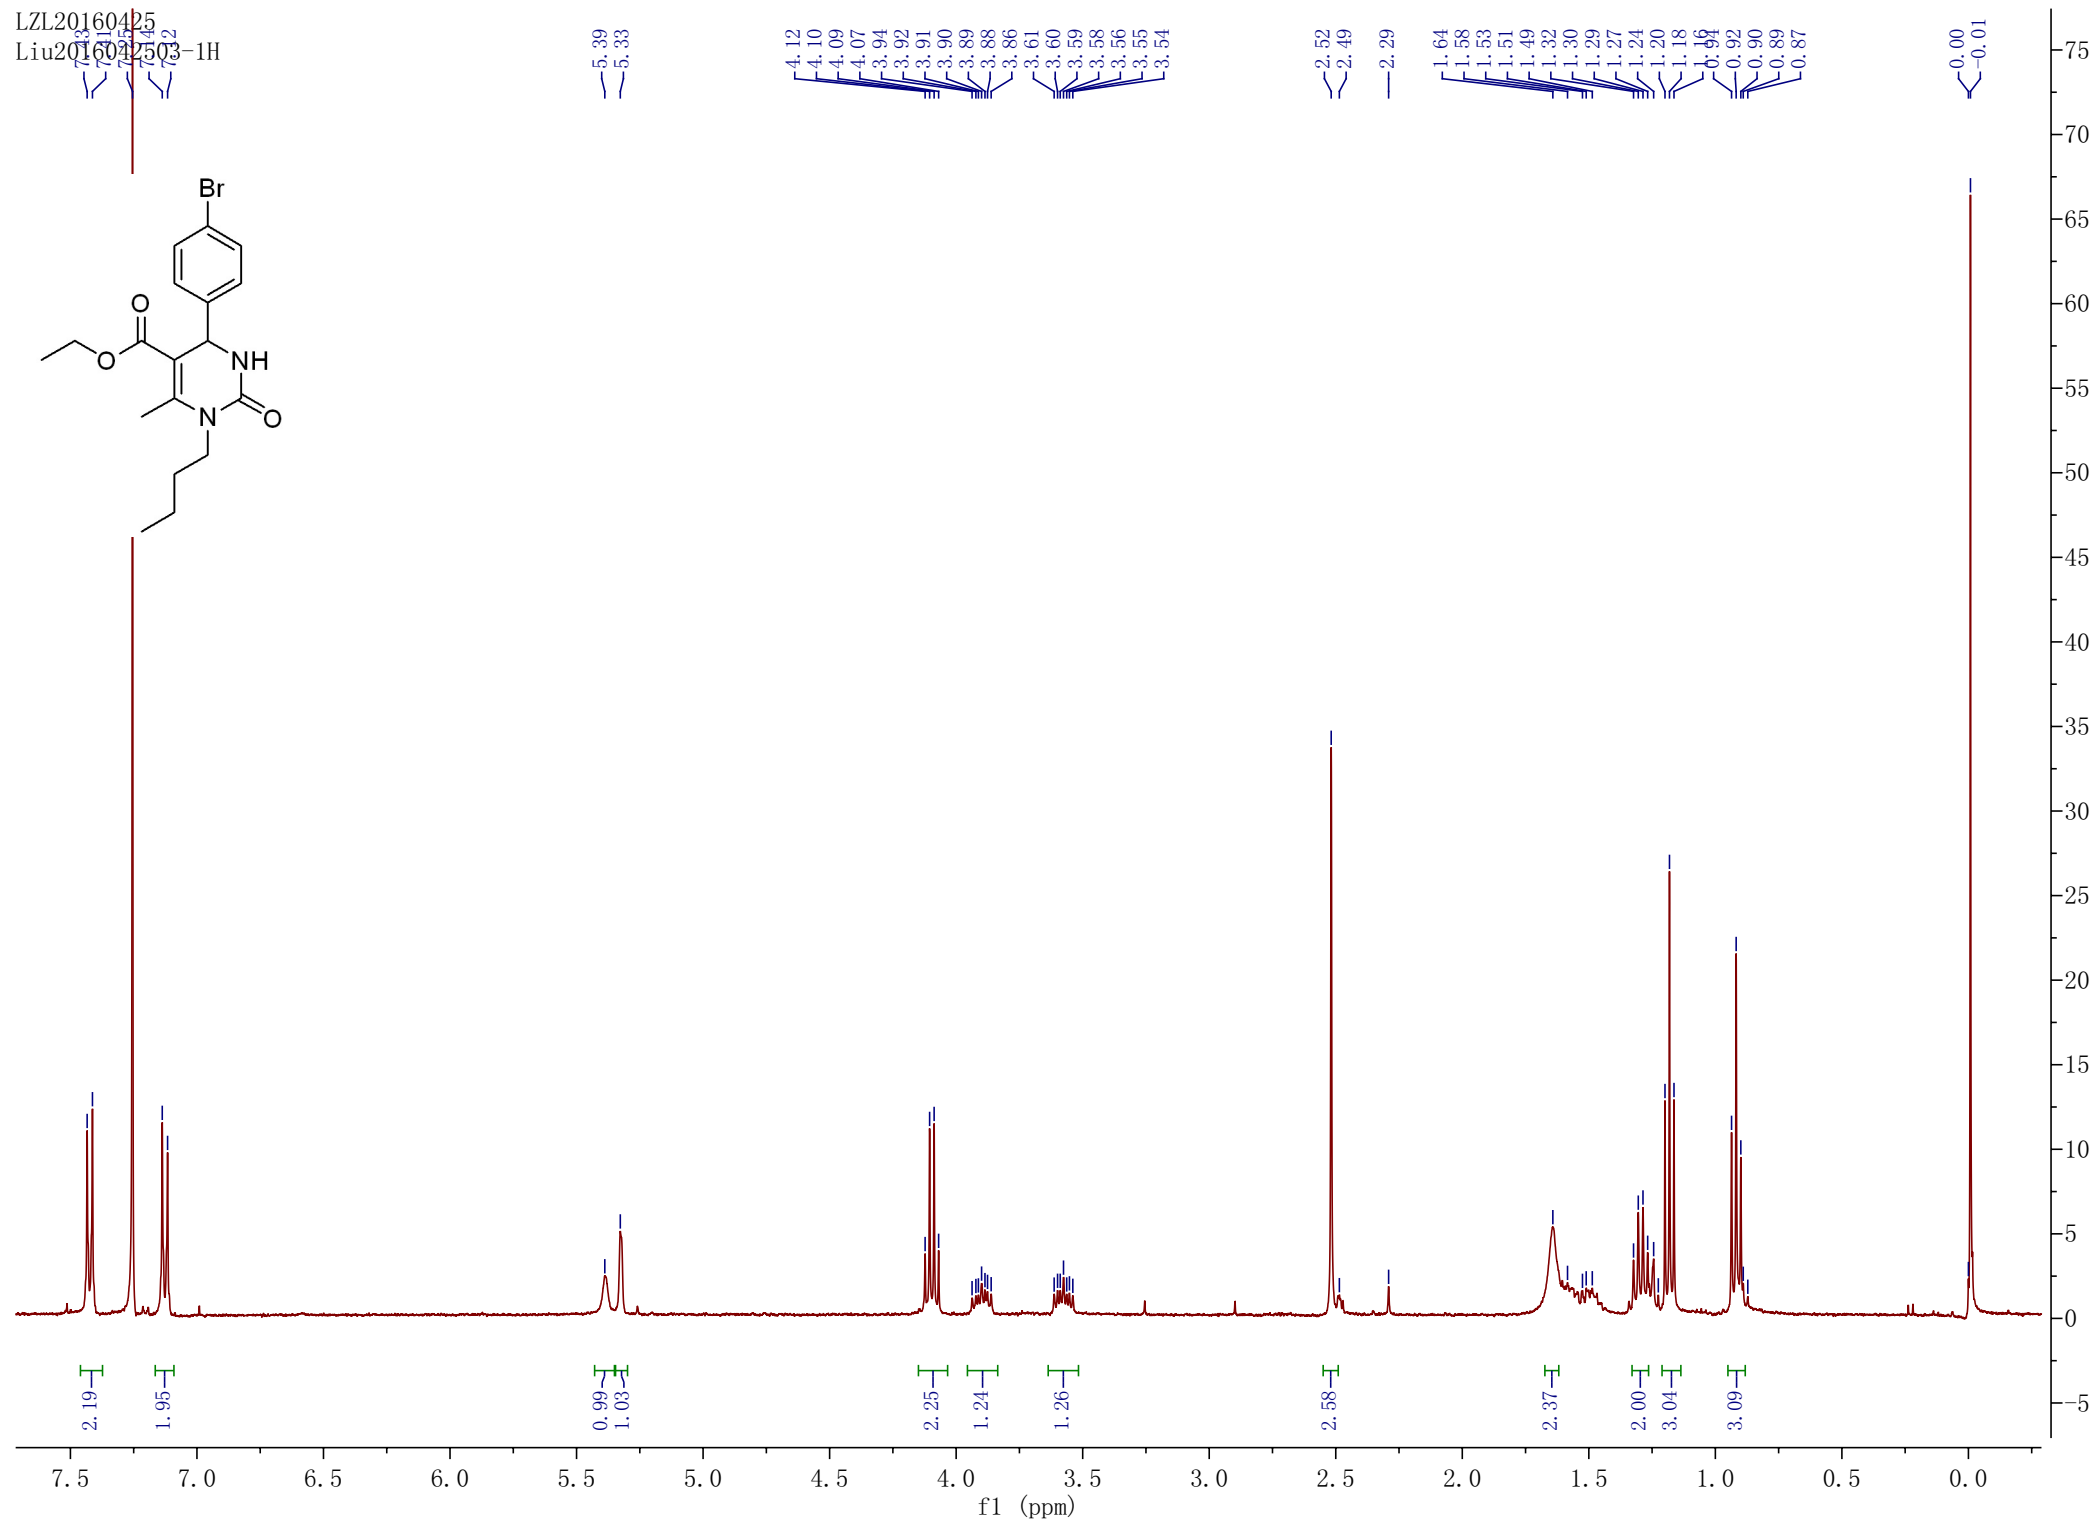

Supplement: s1 [file s1]

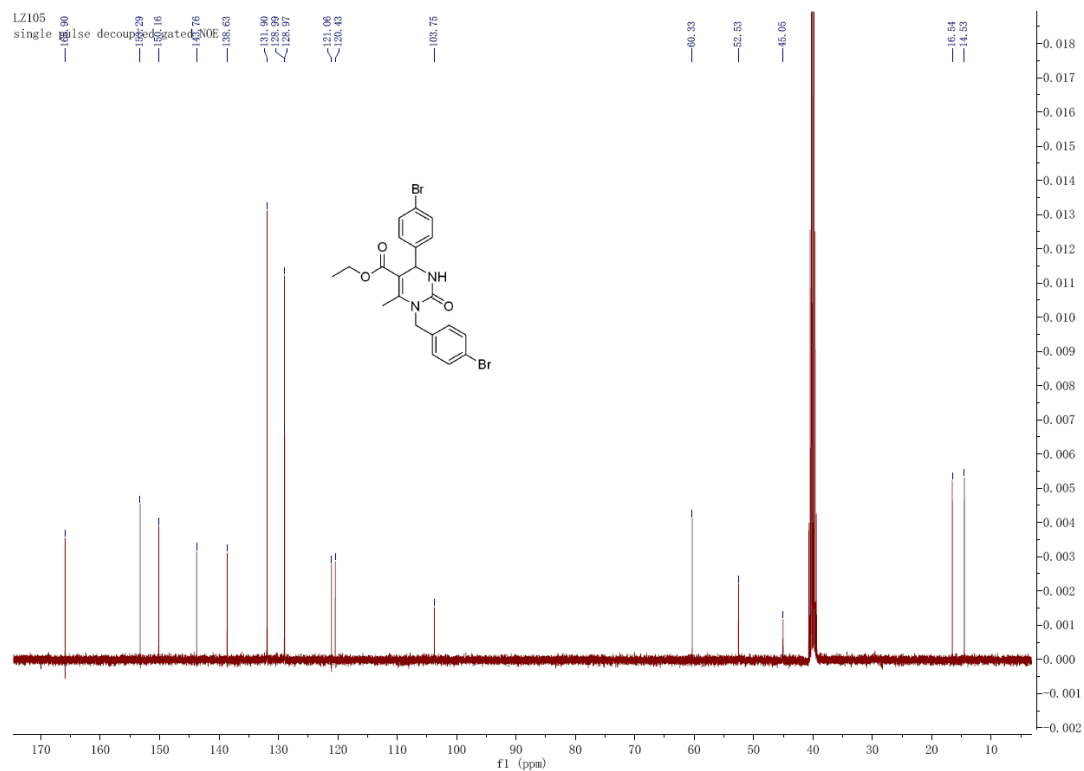

Supplement: s1 [file s1]

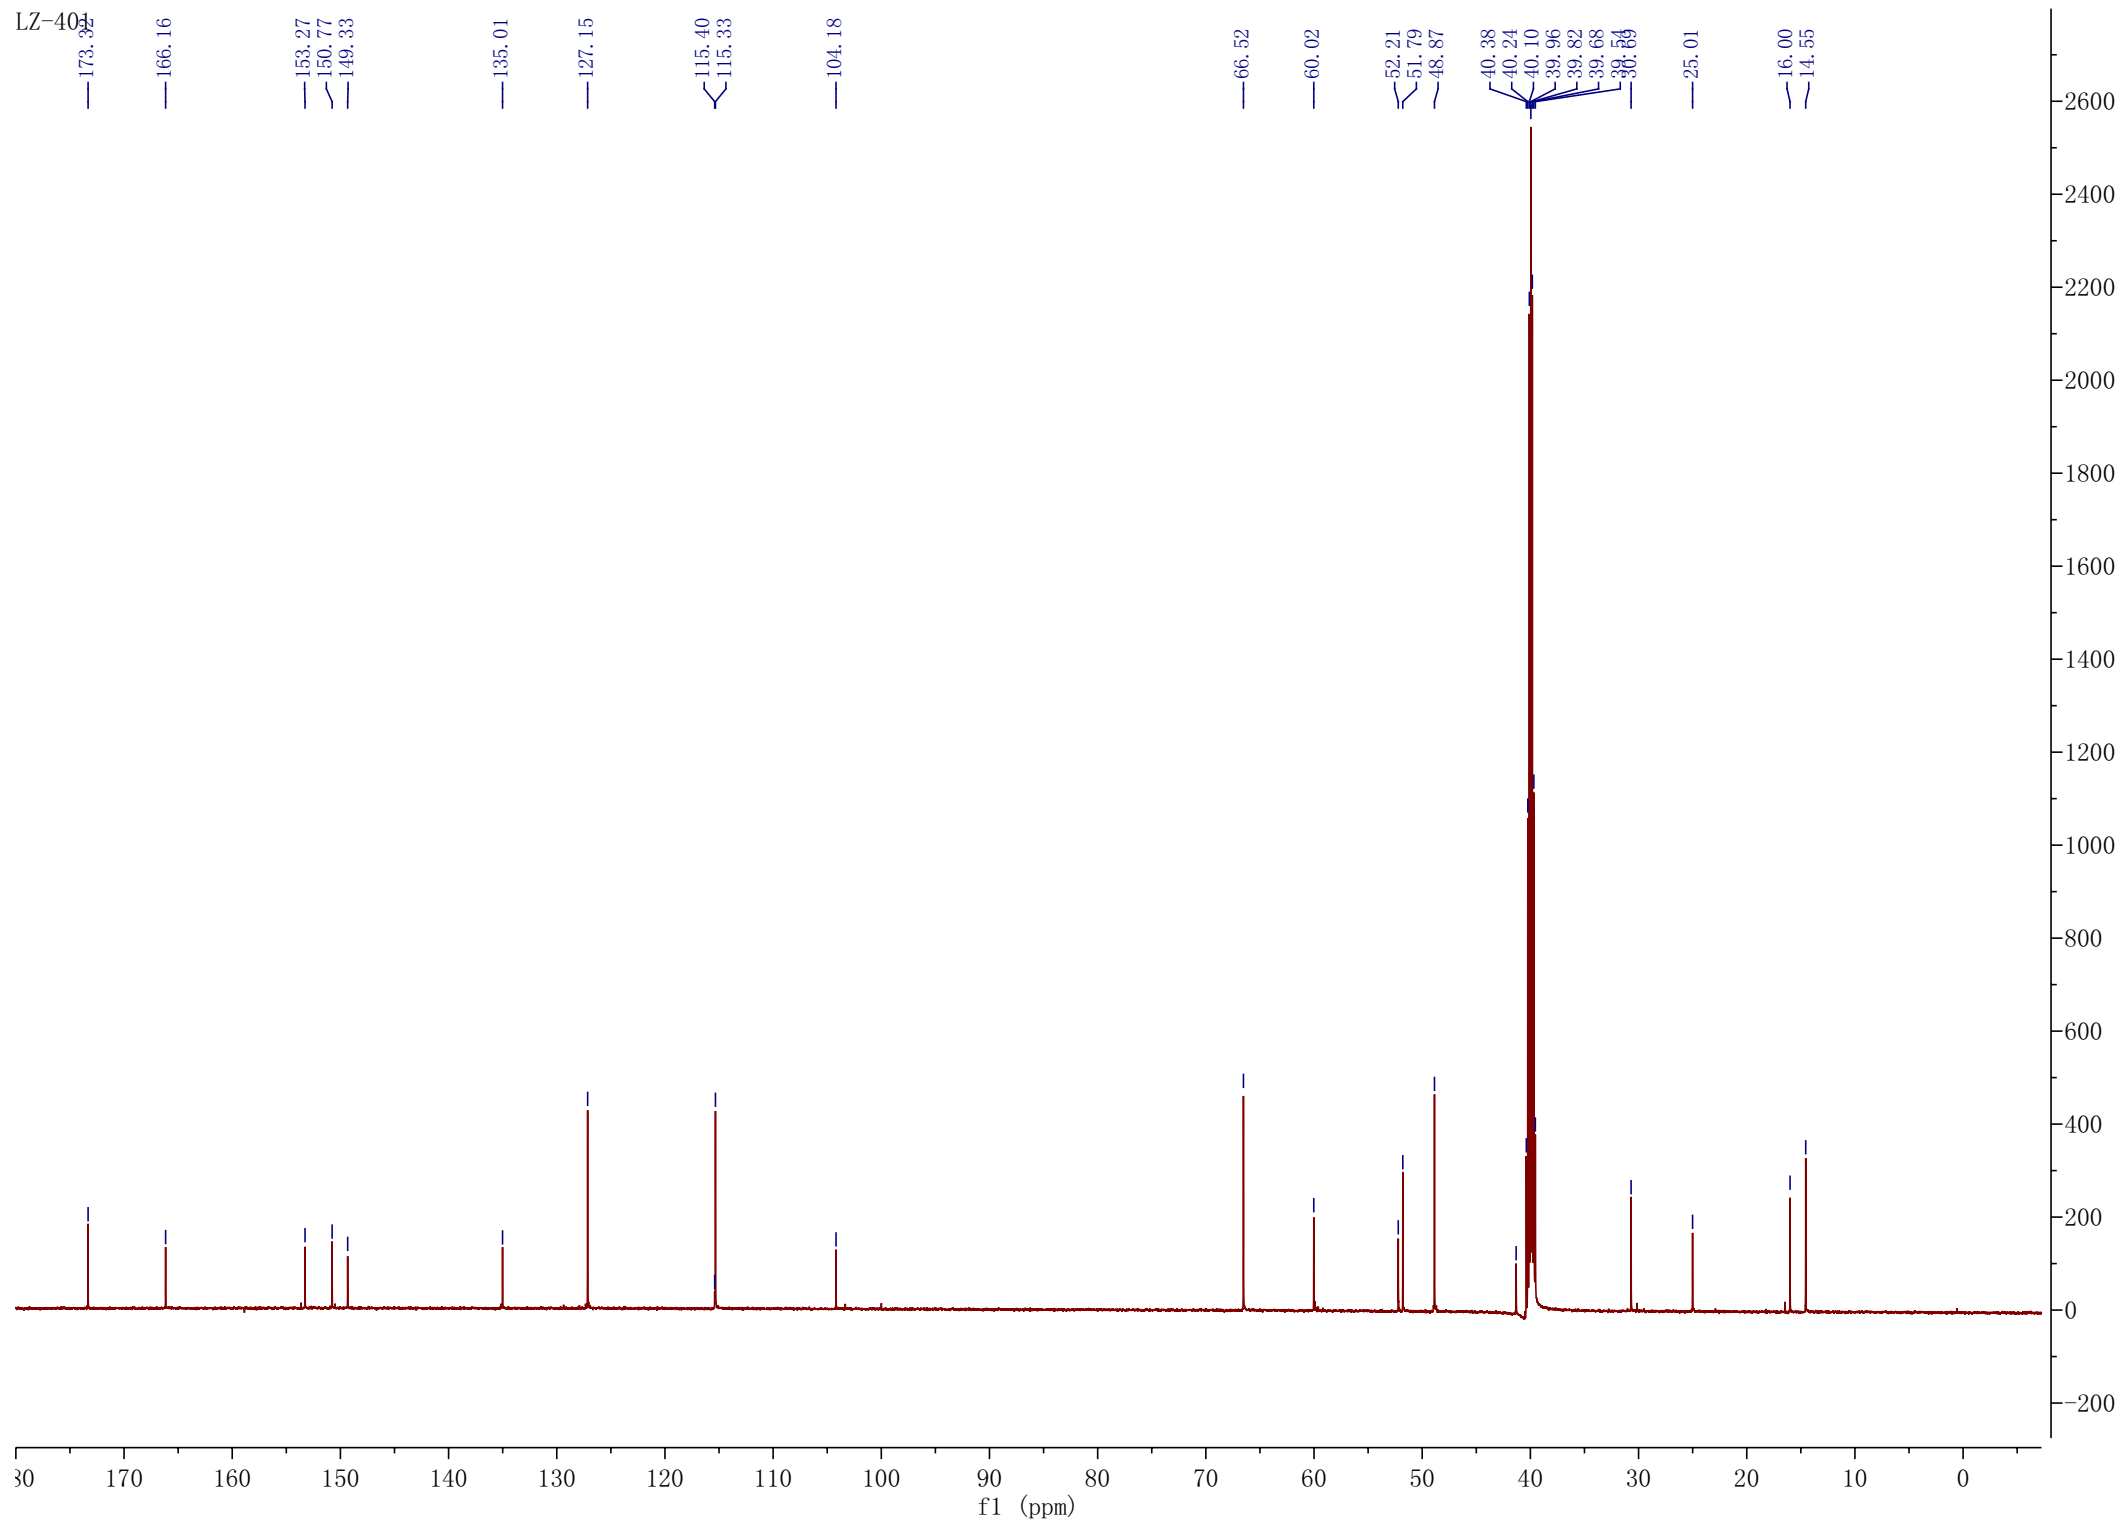

Supplement: s1 [file s1]

LZL20160615  
Liu2016061502-1H

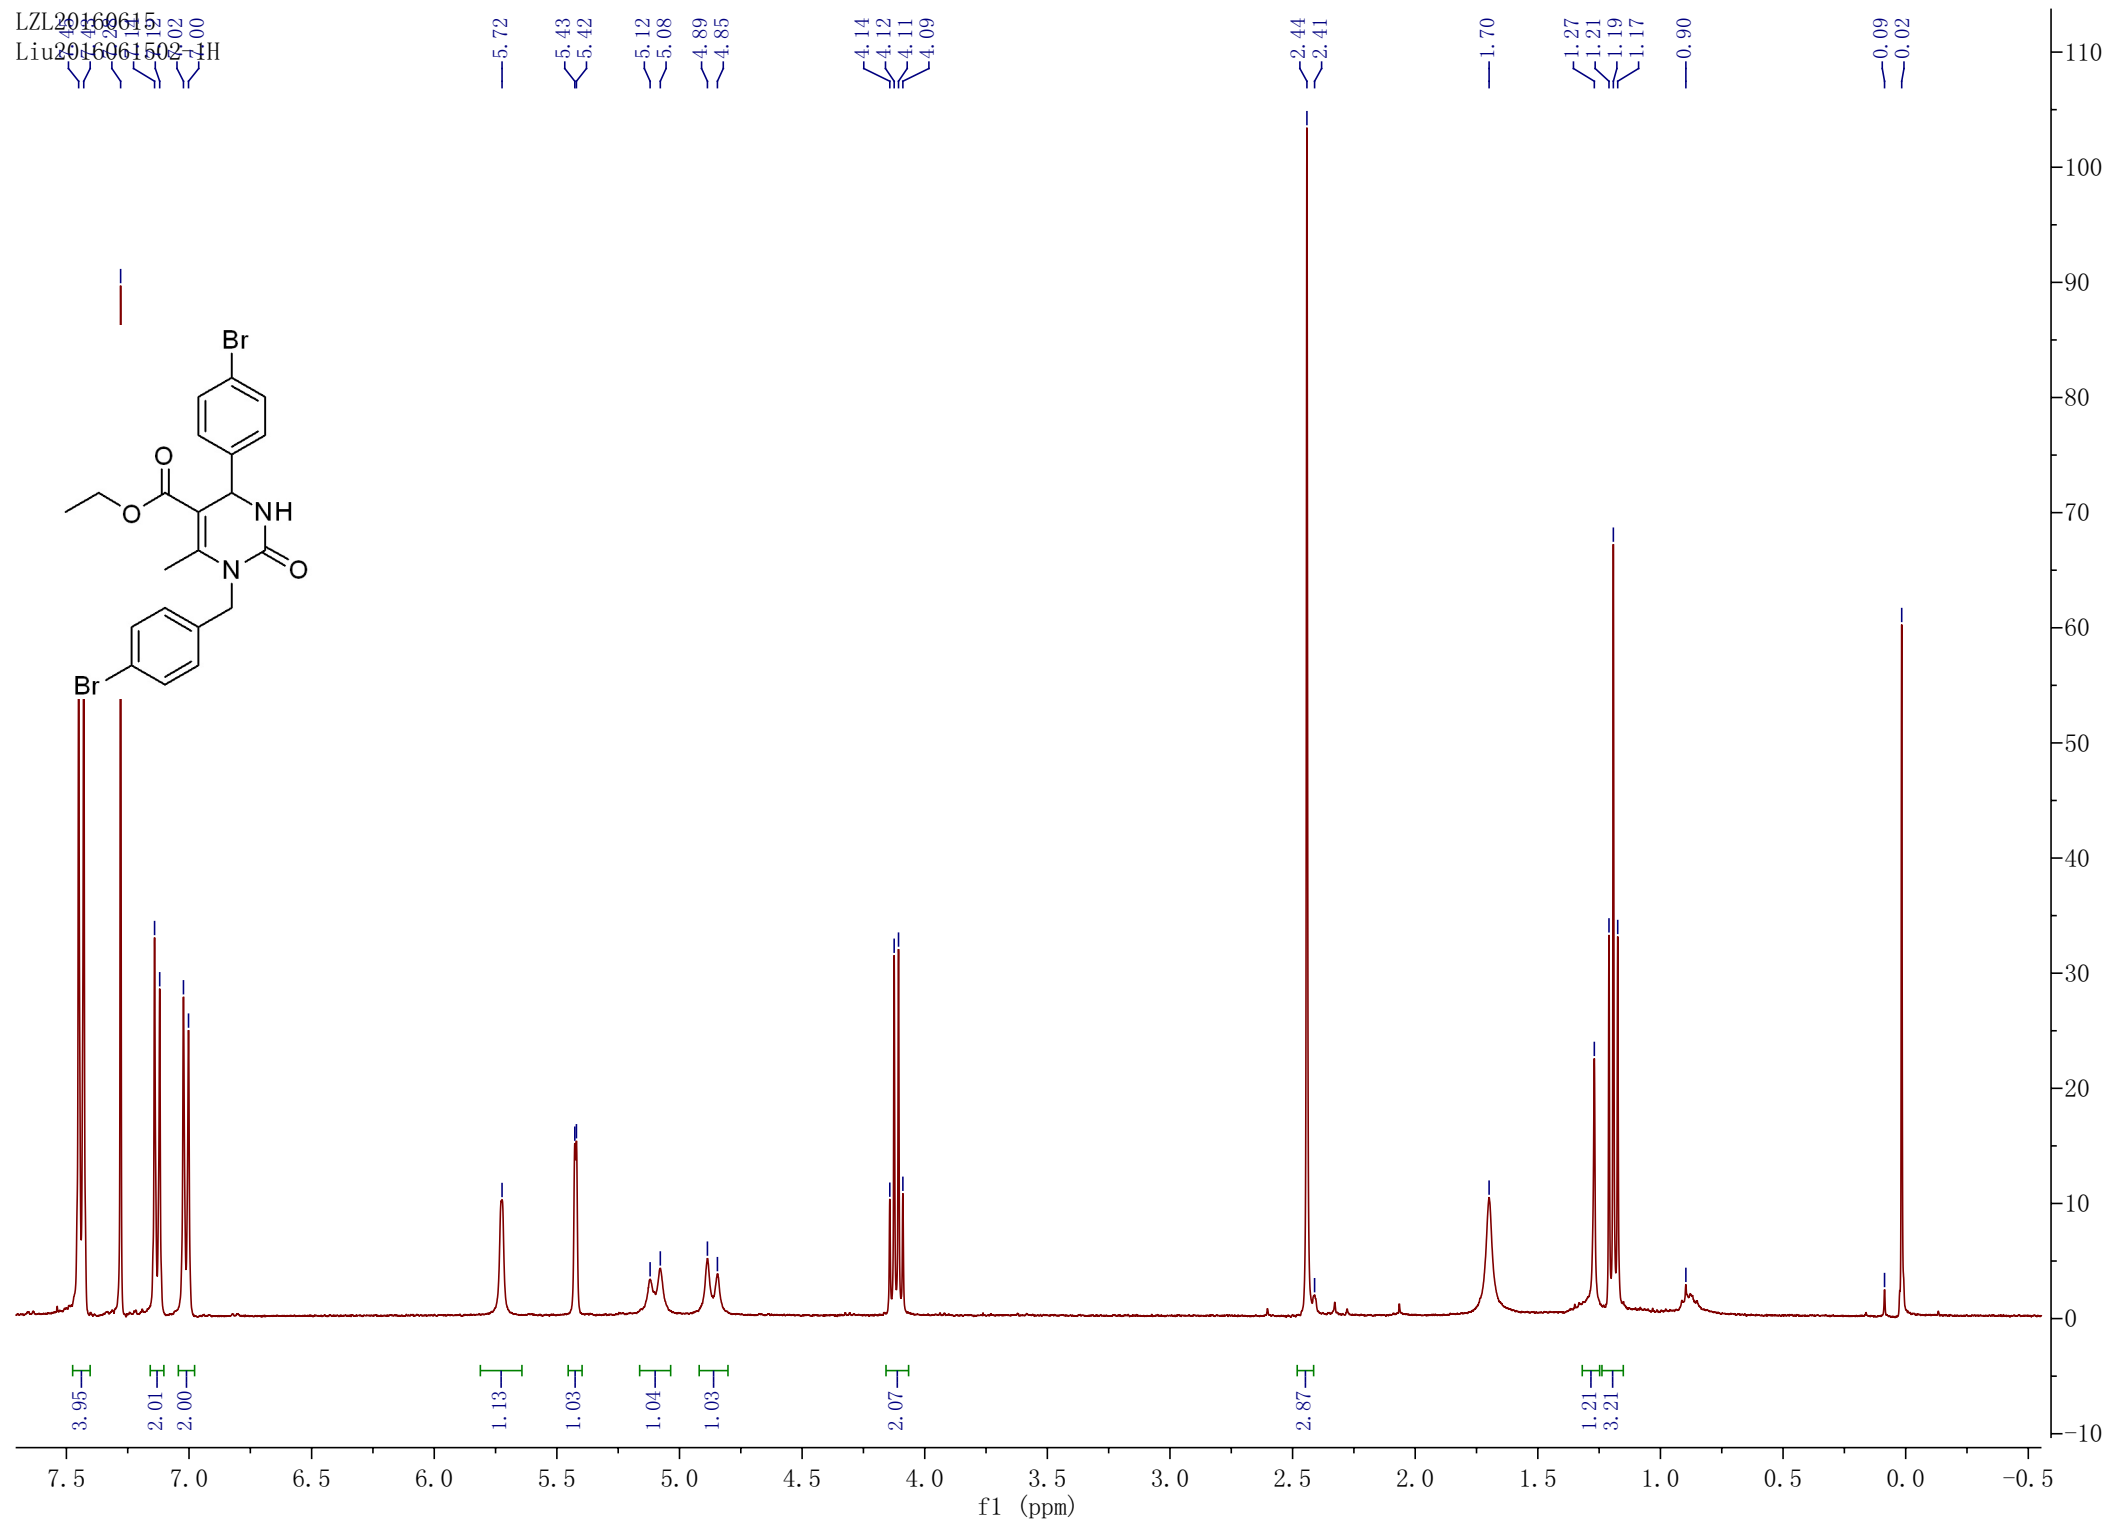

Supplement: s1 [file s1]

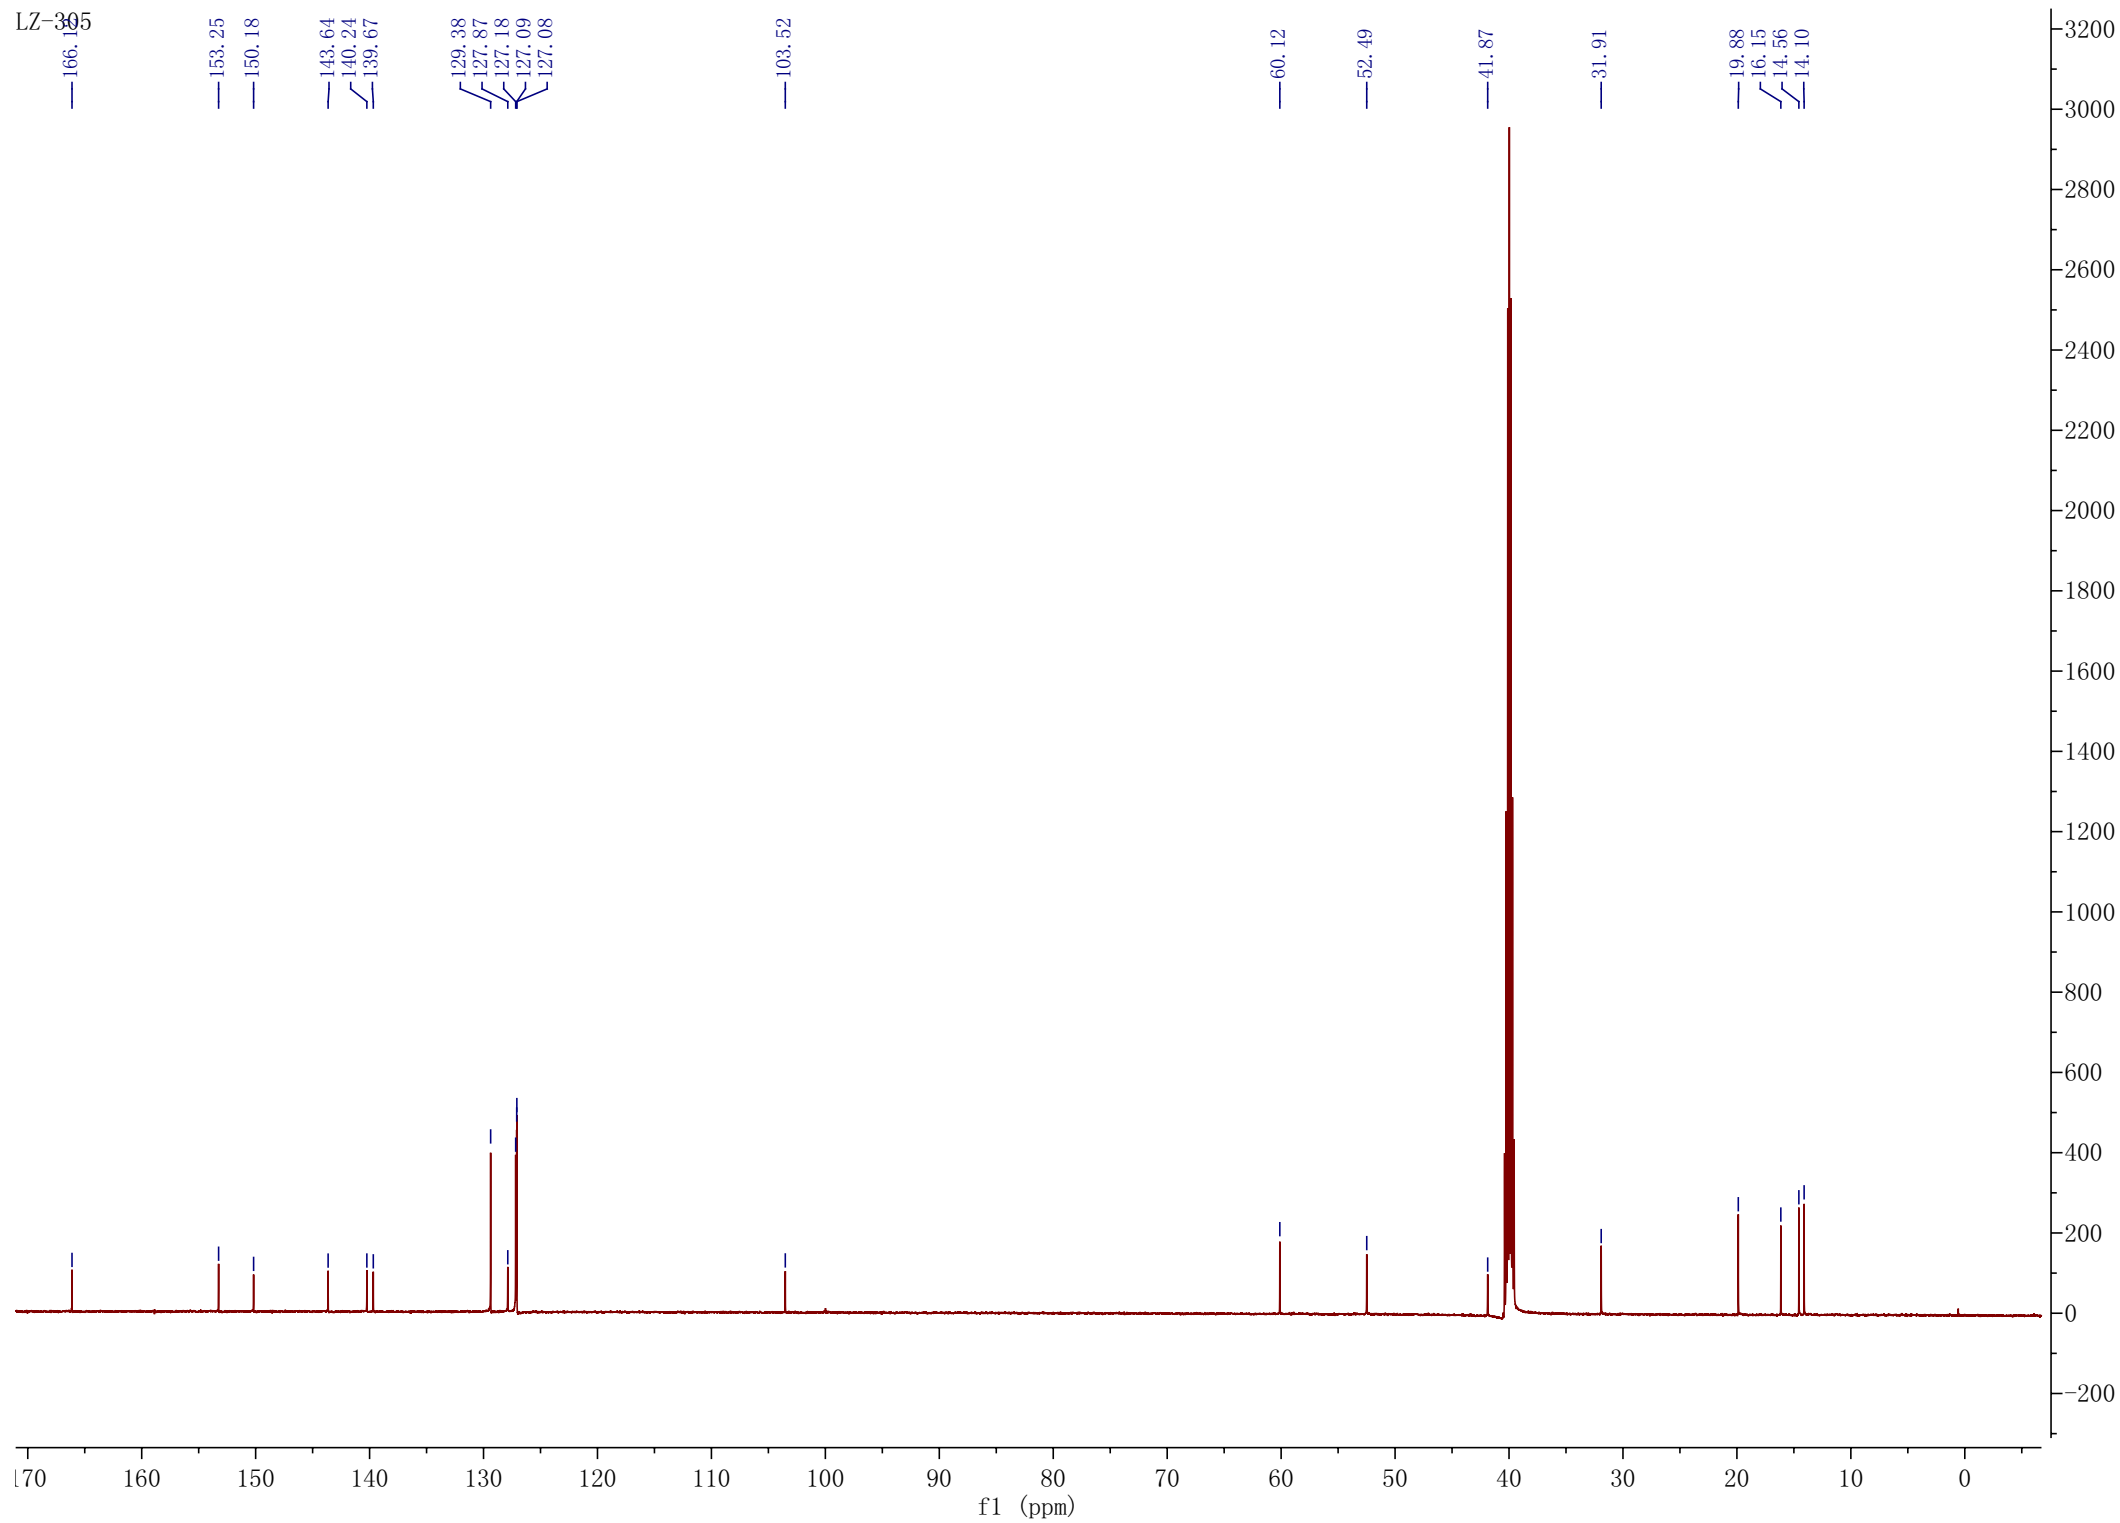

Supplement: s1 [file s1]

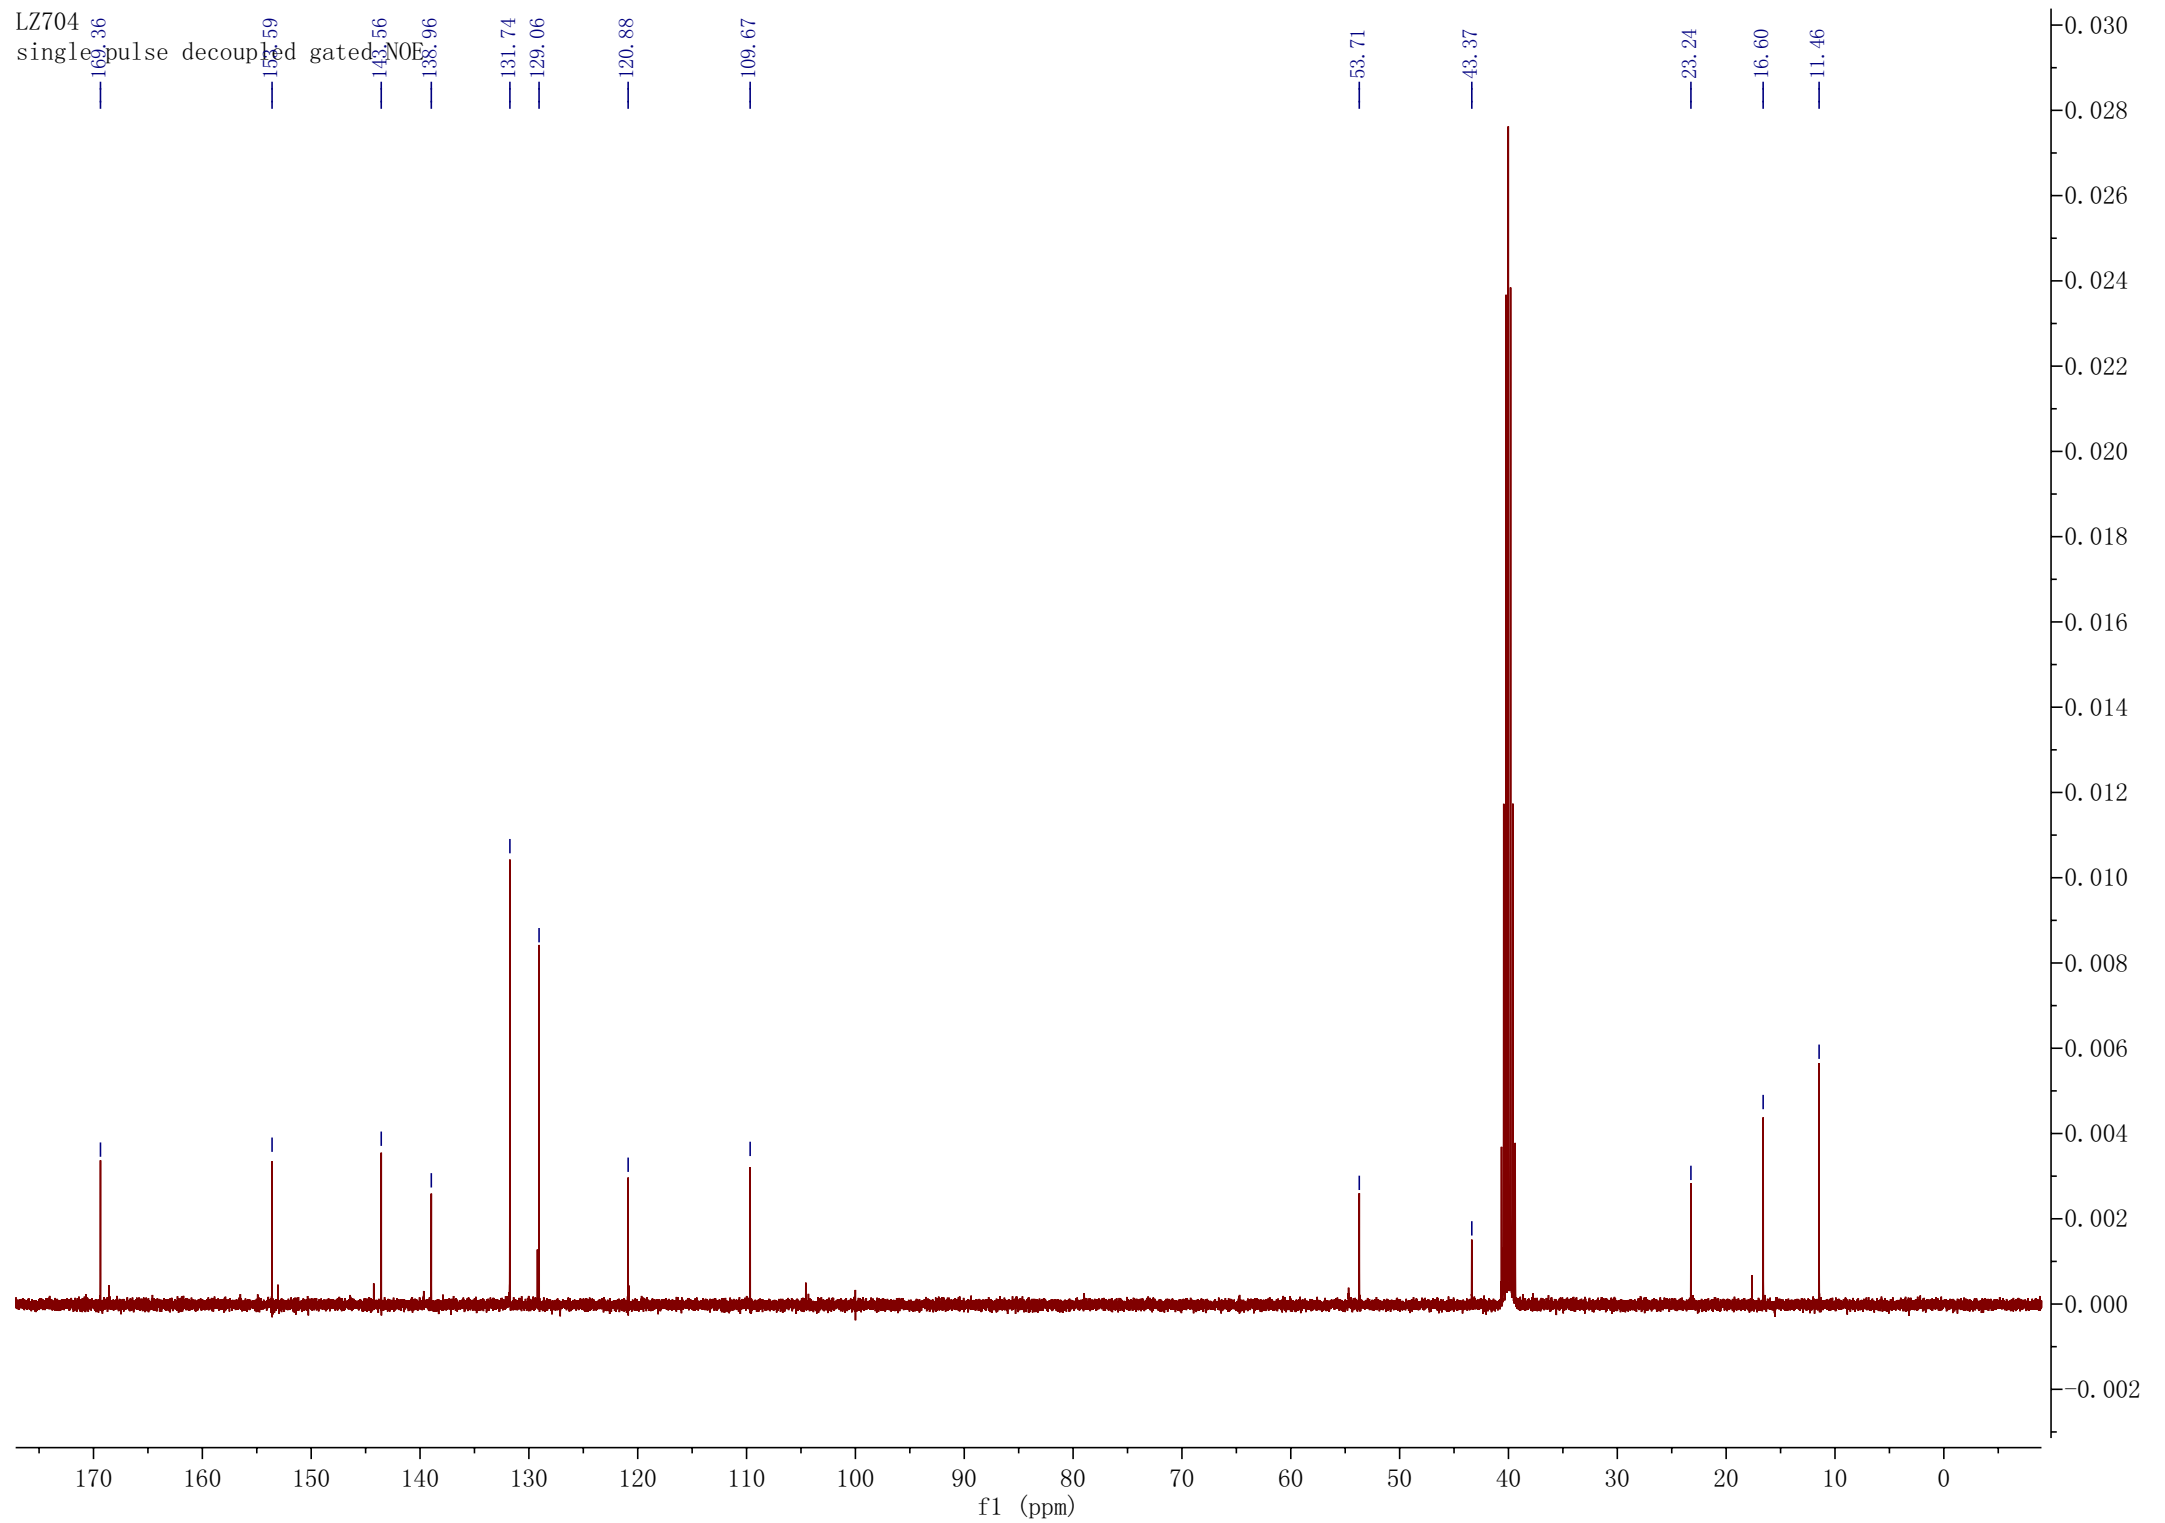

Supplement: s1 [file s1]

Liu2017041404-IH

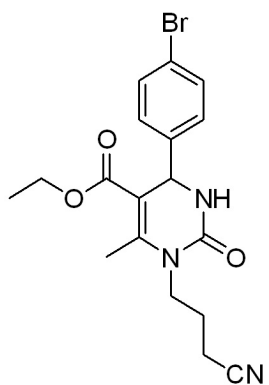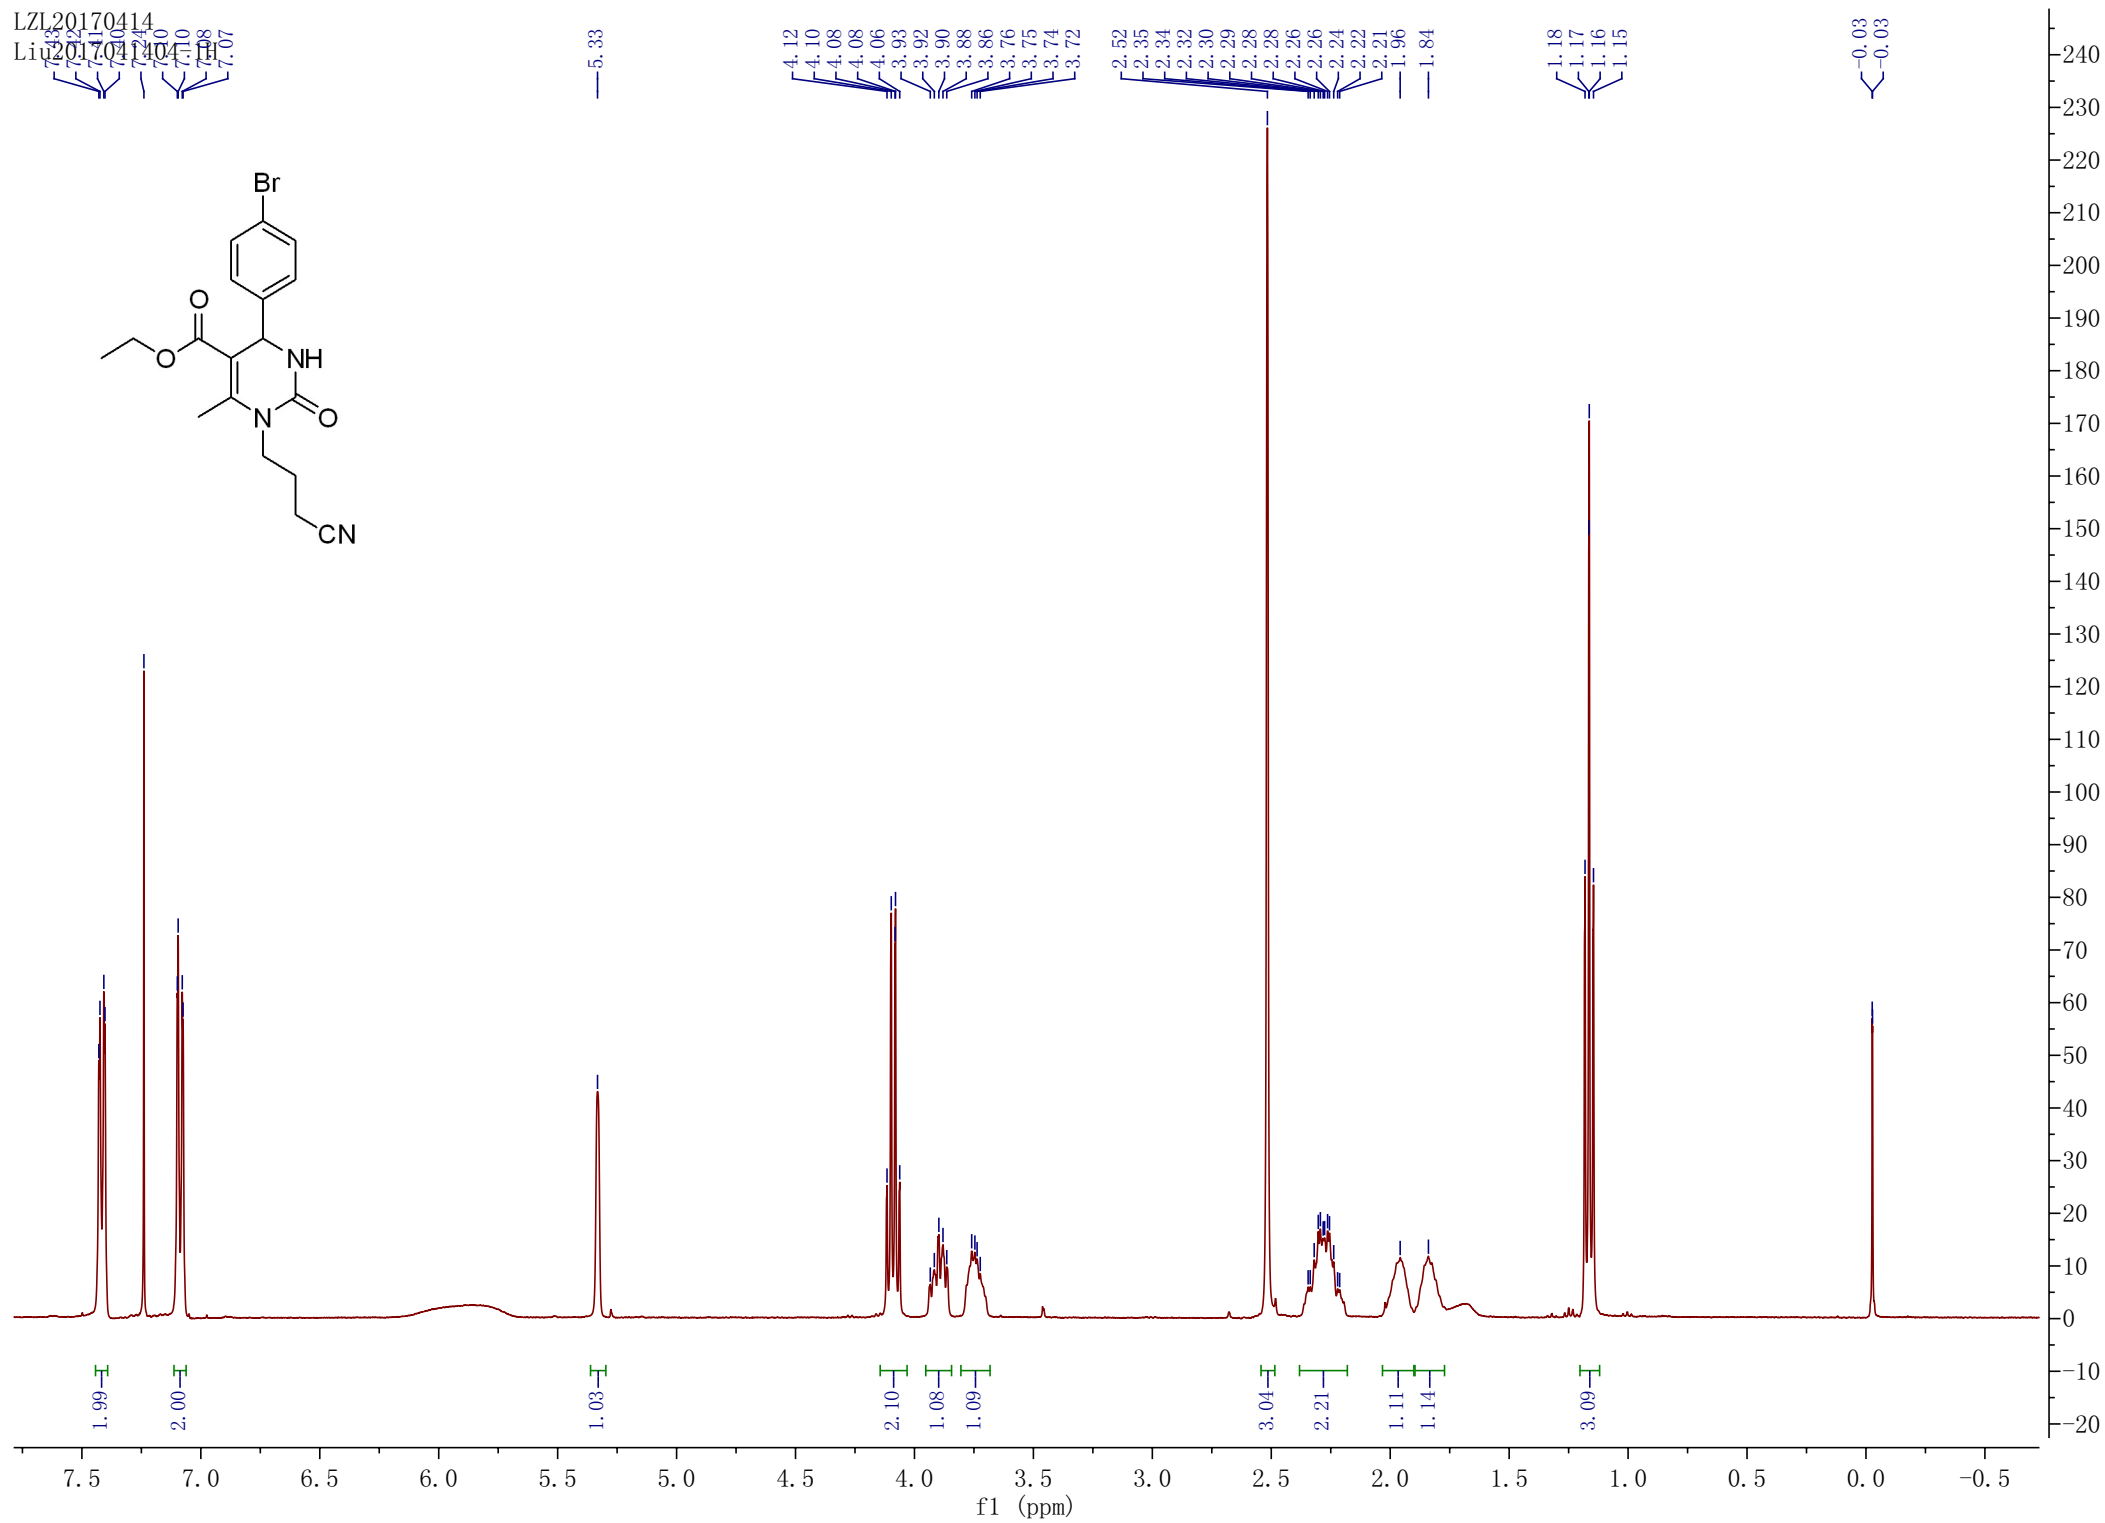

Supplement: s1 [file s1]

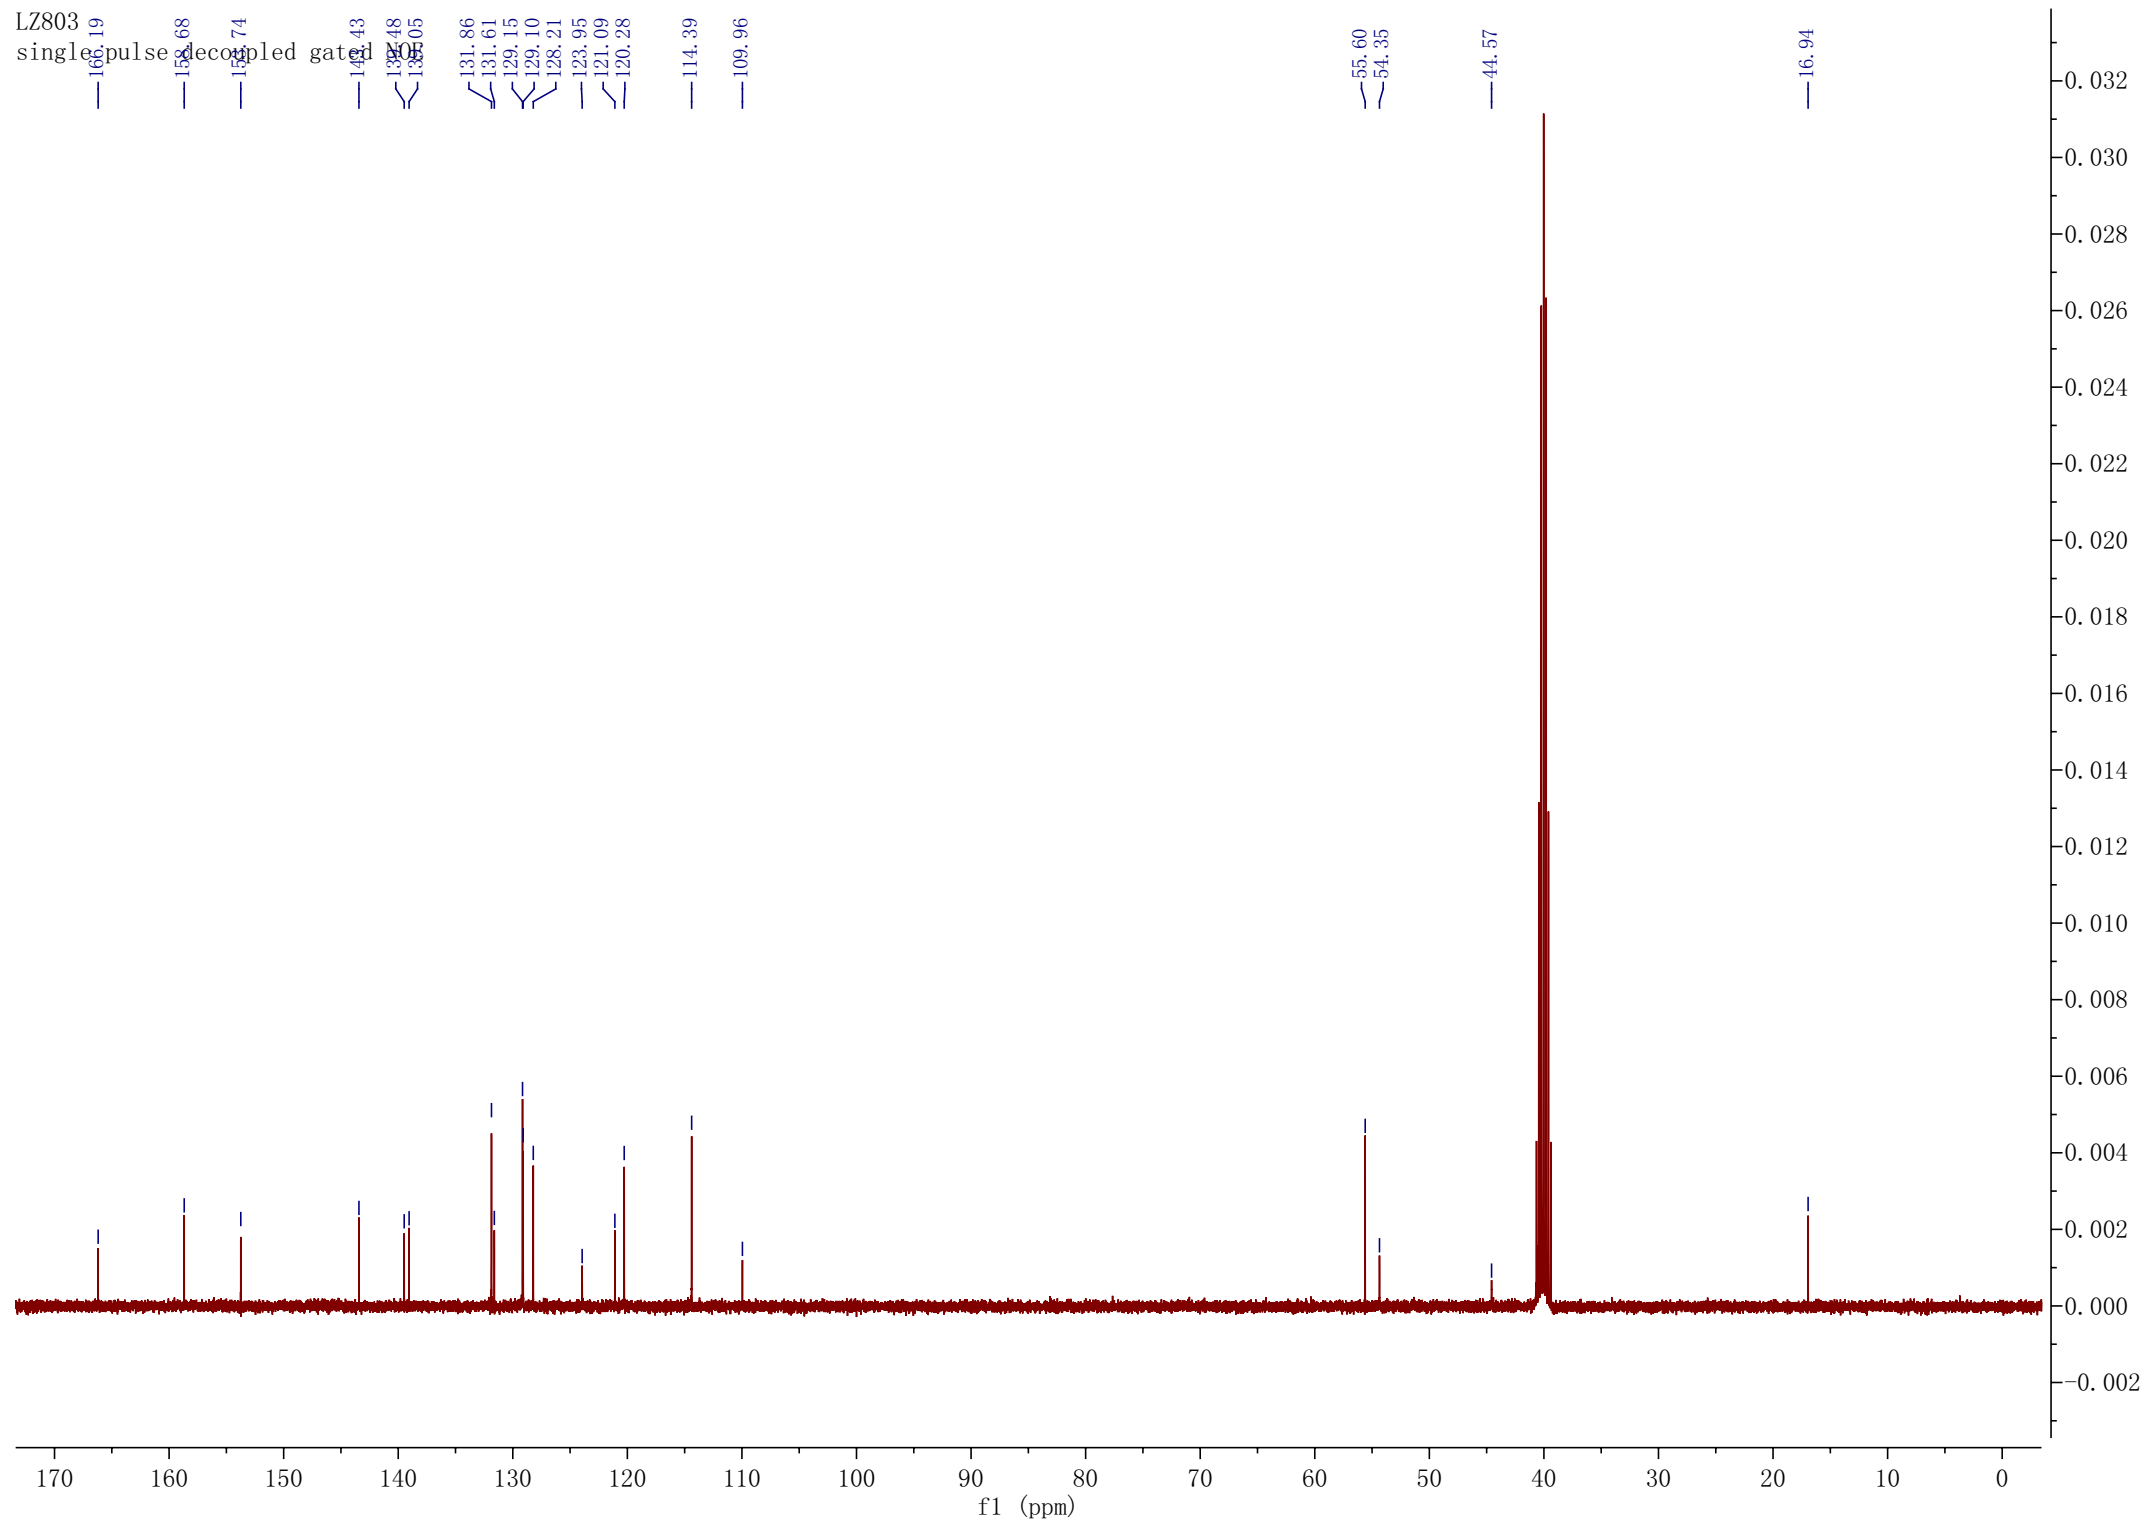

Supplement: s1 [file s1]

LZL20161009  
Liu2016100804-1

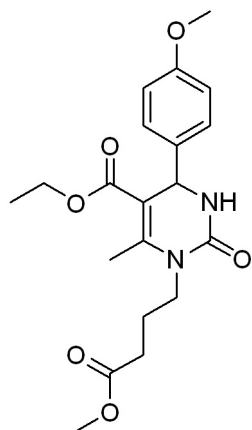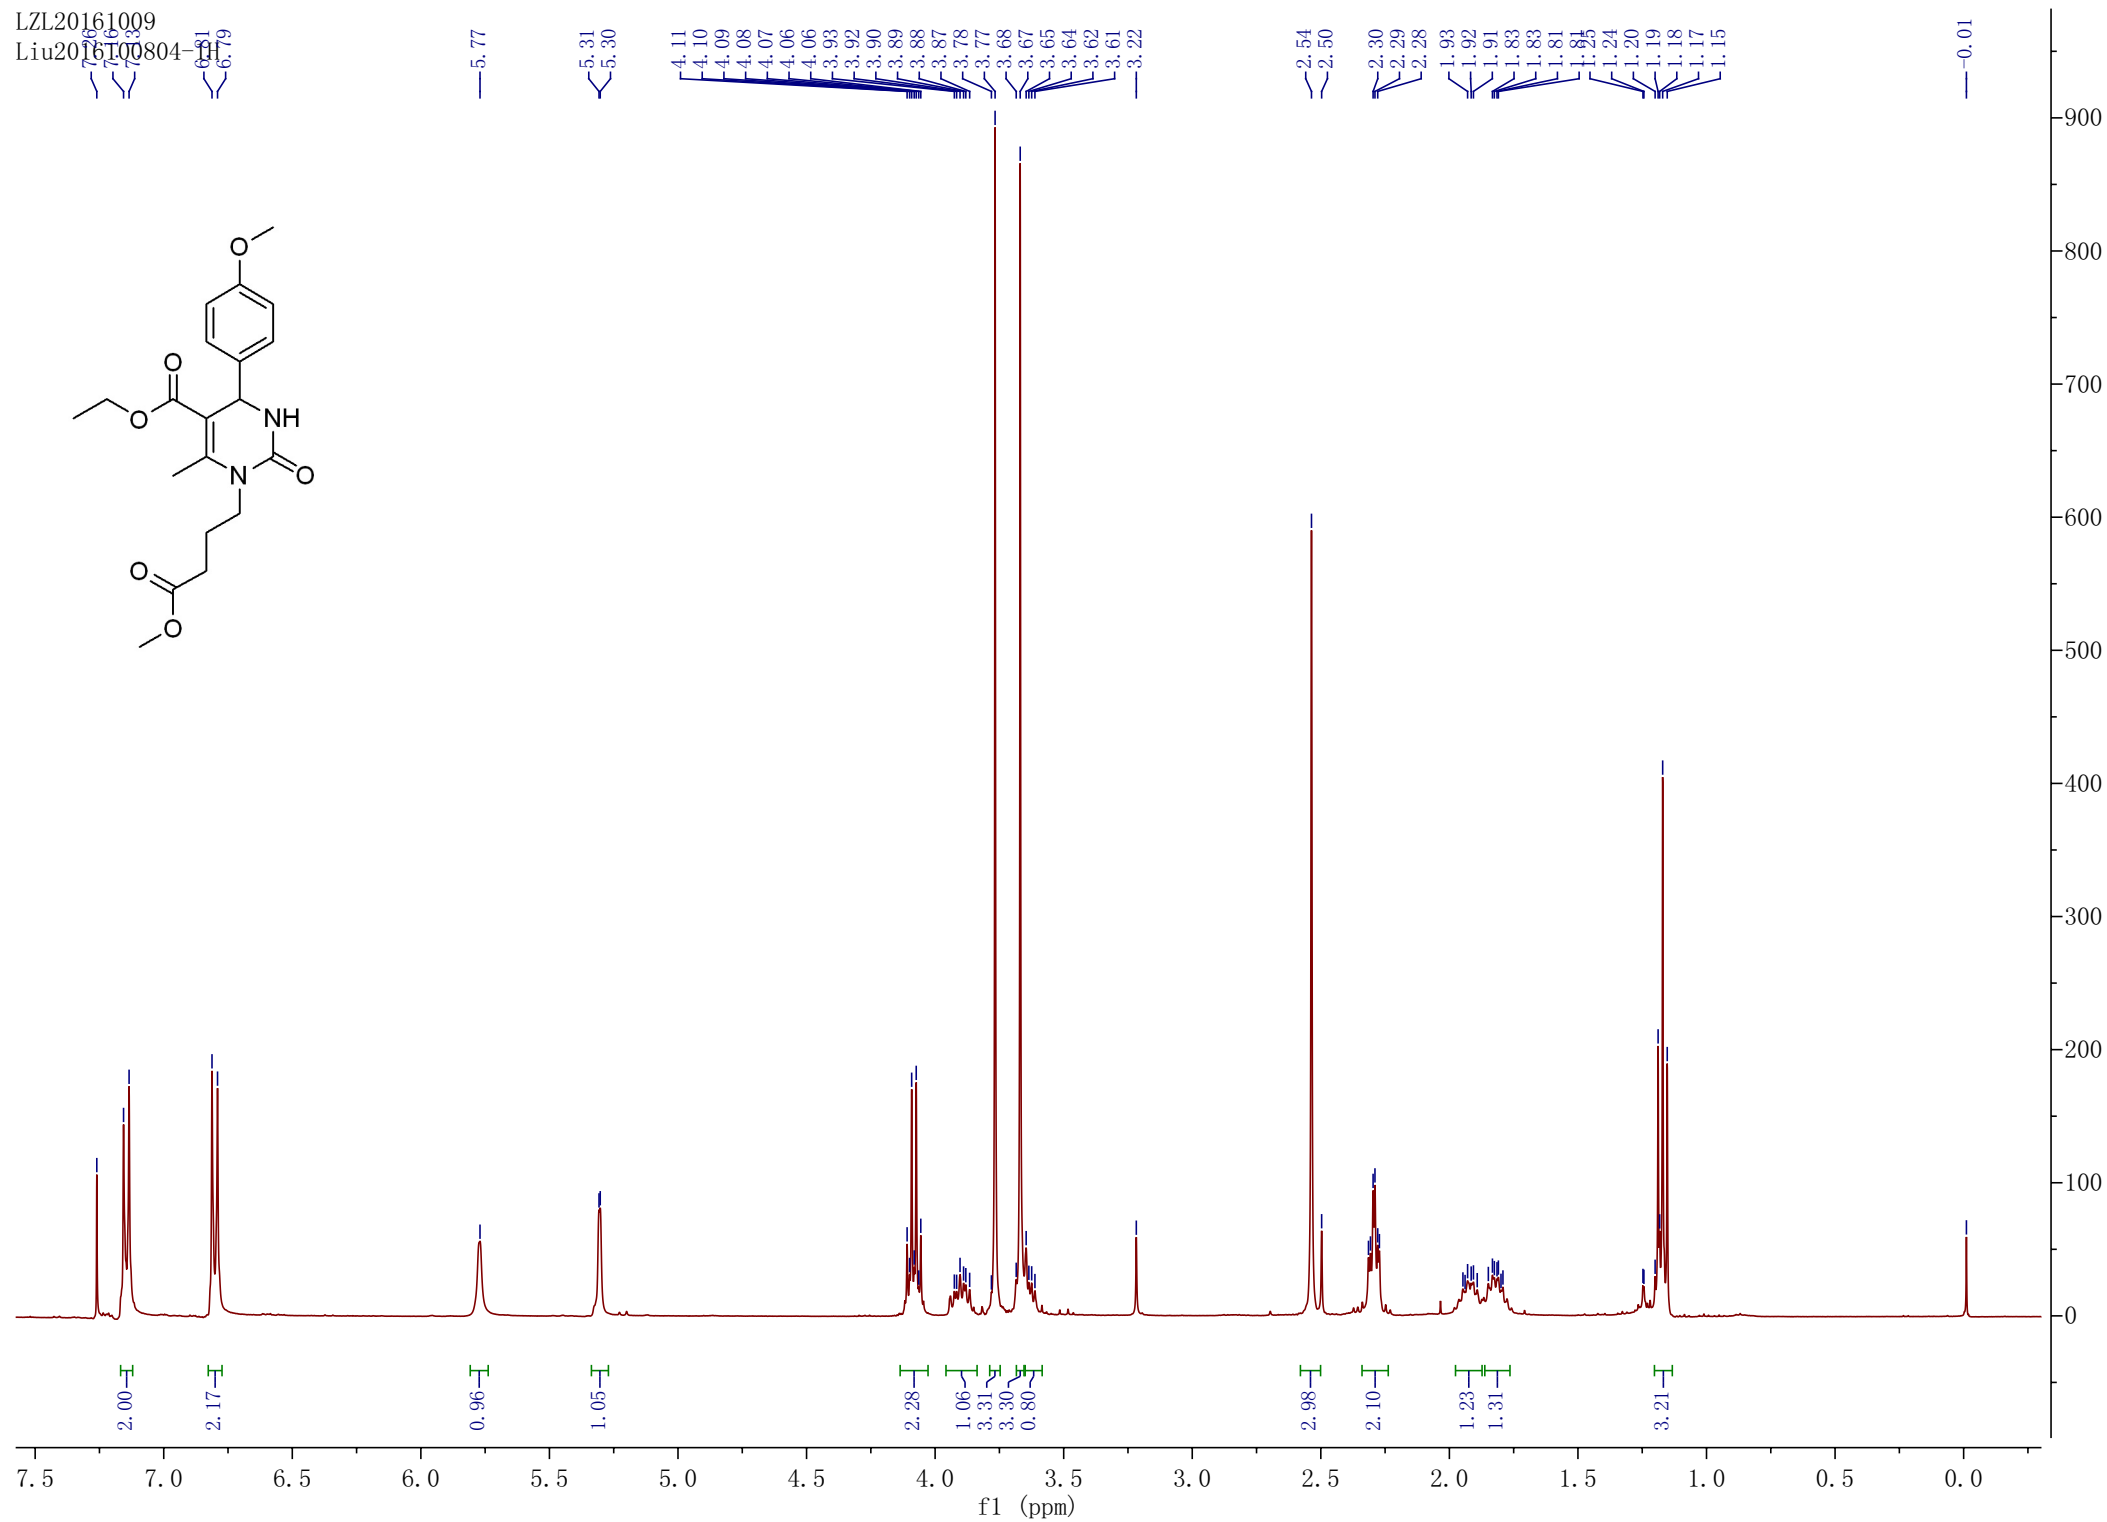

Supplement: s1 [file s1]
